# Supplementary material
Source: bioRxiv or medRxiv preprint supplement (https://medrxiv.org/highwire/filestream/79142/field_highwire_adjunct_files/2/2020.05.02.20084673-3.pdf)
Supplement: Supplementary file [file 2020.05.02.20084673-3.pdf]

|                   | <b>p_val</b> | <b>avg_logFC</b> | <b>pct.1</b> | <b>pct.2</b> | <b>p_val_adj</b> | <b>seurat_clust</b> |
|-------------------|--------------|------------------|--------------|--------------|------------------|---------------------|
| <b>C1QC</b>       | 8.94E-122    | -0.4178032       | 0.727        | 0.074        | 1.79E-118        | 0                   |
| <b>FCGR3A</b>     | 1.27E-77     | -0.2714226       | 0.734        | 0.125        | 2.54E-74         | 0                   |
| <b>C1QB</b>       | 4.17E-76     | -0.4575751       | 0.634        | 0.099        | 8.34E-73         | 0                   |
| <b>HLA-DMB</b>    | 1.17E-64     | -0.2540995       | 0.293        | 0.073        | 2.34E-61         | 0                   |
| <b>C1QA</b>       | 4.62E-60     | -0.3073741       | 0.648        | 0.114        | 9.24E-57         | 0                   |
| <b>AC103591.3</b> | 9.75E-57     | -0.2886829       | 0.794        | 0.102        | 1.95E-53         | 0                   |
| <b>P2RY13</b>     | 2.03E-54     | -0.3020527       | 0.809        | 0.121        | 4.05E-51         | 0                   |
| <b>SMIM25</b>     | 3.98E-42     | -0.2847641       | 0.361        | 0.156        | 7.96E-39         | 0                   |
| <b>CCL3L1</b>     | 5.29E-39     | -0.4084756       | 0.953        | 0.3          | 1.06E-35         | 0                   |
| <b>MEF2C</b>      | 5.51E-37     | -0.3576721       | 0.927        | 0.281        | 1.10E-33         | 0                   |
| <b>RHOB</b>       | 1.43E-35     | -0.3692985       | 0.803        | 0.168        | 2.87E-32         | 0                   |
| <b>HES4</b>       | 7.75E-35     | -0.3715166       | 0.832        | 0.214        | 1.55E-31         | 0                   |
| <b>HIST1H1D</b>   | 1.58E-34     | -0.2501897       | 0.874        | 0.251        | 3.16E-31         | 0                   |
| <b>LIPA</b>       | 2.67E-31     | -0.2962896       | 0.386        | 0.129        | 5.34E-28         | 0                   |
| <b>DUSP6</b>      | 1.23E-23     | -0.3201799       | 0.891        | 0.301        | 2.47E-20         | 0                   |
| <b>NR4A2</b>      | 2.61E-23     | -0.2503004       | 0.94         | 0.352        | 5.22E-20         | 0                   |
| <b>AREG</b>       | 2.96E-16     | -0.6046328       | 1            | 0.412        | 5.92E-13         | 0                   |
| <b>XIST</b>       | 7.79E-14     | -0.3638533       | 0.809        | 0.27         | 1.56E-10         | 0                   |
| <b>IL1B</b>       | 7.83E-14     | -0.3537619       | 0.789        | 0.253        | 1.57E-10         | 0                   |
| <b>LILRB2</b>     | 1.03E-13     | -0.3652414       | 0.566        | 0.373        | 2.05E-10         | 0                   |
| <b>AC020916.1</b> | 2.35E-12     | -0.4577463       | 0.765        | 0.229        | 4.70E-09         | 0                   |

|                 |            |            |       |       |            |   |
|-----------------|------------|------------|-------|-------|------------|---|
| <b>MYL9</b>     | 1.26E-10   | 0.25321932 | 0.406 | 0.009 | 2.51E-07   | 0 |
| <b>TAGLN2</b>   | 1.74E-10   | 0.31865603 | 0.858 | 0.471 | 3.48E-07   | 0 |
| <b>MX1</b>      | 3.15E-10   | 0.27496279 | 0.444 | 0.078 | 6.31E-07   | 0 |
| <b>S100A12</b>  | 9.34E-10   | 0.33584764 | 0.934 | 0.694 | 1.87E-06   | 0 |
| <b>FABP5</b>    | 1.02E-09   | -0.5984517 | 0.679 | 0.15  | 2.03E-06   | 0 |
| <b>MT-CYB</b>   | 4.29E-07   | -0.2507279 | 0.964 | 0.926 | 0.00085827 | 0 |
| <b>CTSC</b>     | 4.51E-07   | -0.3015515 | 0.736 | 0.245 | 0.00090206 | 0 |
| <b>ZFP36L2</b>  | 1.39E-06   | -0.3042871 | 0.965 | 0.48  | 0.00278484 | 0 |
| <b>H1FX</b>     | 5.03E-05   | -0.3026965 | 0.729 | 0.531 | 0.10055574 | 0 |
| <b>SGK1</b>     | 6.11E-05   | -0.3052721 | 0.707 | 0.232 | 0.12218812 | 0 |
| <b>MT-ND6</b>   | 0.00013471 | -0.3371457 | 0.681 | 0.203 | 0.26941857 | 0 |
| <b>APOBEC3A</b> | 0.03868626 | 0.2635256  | 0.537 | 0.152 | 1          | 0 |
| <b>LGALS2</b>   | 0.05053918 | 0.2610873  | 0.514 | 0.093 | 1          | 0 |
| <b>ALOX5AP</b>  | 0.05582648 | -0.2932865 | 0.663 | 0.225 | 1          | 0 |
| <b>C5AR1</b>    | 0.0957702  | -0.2803736 | 0.636 | 0.29  | 1          | 0 |
| <b>IFITM2</b>   | 0.28960878 | -0.2799673 | 0.885 | 0.59  | 1          | 0 |
| <b>ATP1B3</b>   | 0.45636002 | -0.3689094 | 0.636 | 0.214 | 1          | 0 |
| <b>G0S2</b>     | 0.83057327 | 0.40249797 | 0.59  | 0.214 | 1          | 0 |
| <b>XIST1</b>    | 4.37E-64   | -0.4051312 | 0.778 | 0.09  | 8.74E-61   | 1 |
| <b>KLRB1</b>    | 9.33E-35   | -0.5097924 | 0.814 | 0.169 | 1.87E-31   | 1 |
| <b>S100A8</b>   | 3.24E-26   | -0.8871467 | 0.382 | 0.113 | 6.47E-23   | 1 |

|                    |            |            |       |       |            |   |
|--------------------|------------|------------|-------|-------|------------|---|
| <b>IFI44L</b>      | 9.16E-21   | 0.27191669 | 0.328 | 0.024 | 1.83E-17   | 1 |
| <b>RGCC</b>        | 6.41E-20   | -0.2916723 | 0.803 | 0.224 | 1.28E-16   | 1 |
| <b>PTGER4</b>      | 9.65E-18   | -0.2660795 | 0.808 | 0.236 | 1.93E-14   | 1 |
| <b>ANXA1</b>       | 2.21E-16   | -0.3315336 | 0.924 | 0.359 | 4.42E-13   | 1 |
| <b>RPL22L1</b>     | 5.43E-13   | -0.2595398 | 0.565 | 0.367 | 1.09E-09   | 1 |
| <b>AREG1</b>       | 1.97E-10   | -0.451984  | 0.827 | 0.314 | 3.95E-07   | 1 |
| <b>S100A4</b>      | 1.88E-09   | -0.4971855 | 0.915 | 0.738 | 3.77E-06   | 1 |
| <b>DUSP2</b>       | 1.27E-08   | -0.4782212 | 0.863 | 0.359 | 2.54E-05   | 1 |
| <b>CH25H</b>       | 4.63E-07   | -0.2925286 | 0.539 | 0.055 | 0.00092505 | 1 |
| <b>HMGB1</b>       | 1.45E-06   | -0.2952237 | 0.858 | 0.717 | 0.00289796 | 1 |
| <b>MT2A</b>        | 1.06E-05   | -0.4842262 | 0.736 | 0.256 | 0.02126962 | 1 |
| <b>SEC61G</b>      | 4.88E-05   | -0.2650275 | 0.835 | 0.381 | 0.09765694 | 1 |
| <b>IFITM21</b>     | 0.00027793 | -0.2506663 | 0.736 | 0.532 | 0.55586093 | 1 |
| <b>H1FX1</b>       | 0.013338   | -0.5149901 | 0.827 | 0.411 | 1          | 1 |
| <b>AL138963.3</b>  | 0.04360453 | 0.26896399 | 0.548 | 0.187 | 1          | 1 |
| <b>TMEM156</b>     | 0.04675996 | -0.3065187 | 0.553 | 0.162 | 1          | 1 |
| <b>CD3G</b>        | 0.20907097 | -0.284496  | 0.782 | 0.477 | 1          | 1 |
| <b>PRDM1</b>       | 0.40626428 | -0.286767  | 0.733 | 0.35  | 1          | 1 |
| <b>TNFSF9</b>      | 3.98E-132  | -0.2885356 | 0.909 | 0.074 | 7.96E-129  | 2 |
| <b>AC020916.11</b> | 1.46E-86   | -0.2653655 | 0.892 | 0.102 | 2.93E-83   | 2 |
| <b>IFI27</b>       | 1.22E-78   | 0.30714095 | 0.164 | 0.01  | 2.44E-75   | 2 |
| <b>IFI44L1</b>     | 1.16E-75   | 0.43451153 | 0.227 | 0.014 | 2.32E-72   | 2 |

|                   |          |            |       |       |            |   |
|-------------------|----------|------------|-------|-------|------------|---|
| <b>GZMK</b>       | 1.91E-59 | -0.444997  | 0.771 | 0.119 | 3.83E-56   | 2 |
| <b>XCL2</b>       | 2.60E-57 | -0.3684424 | 0.838 | 0.116 | 5.19E-54   | 2 |
| <b>XCL1</b>       | 6.63E-51 | -0.6817768 | 0.858 | 0.152 | 1.33E-47   | 2 |
| <b>CCL4L2</b>     | 7.77E-50 | -0.621651  | 0.825 | 0.119 | 1.55E-46   | 2 |
| <b>TENT5C</b>     | 1.22E-43 | -0.2796355 | 0.899 | 0.213 | 2.44E-40   | 2 |
| <b>S100A81</b>    | 1.74E-43 | -0.4546602 | 0.823 | 0.137 | 3.47E-40   | 2 |
| <b>COTL1</b>      | 9.23E-40 | -0.3194851 | 0.875 | 0.206 | 1.85E-36   | 2 |
| <b>ZBP1</b>       | 4.73E-39 | 0.2576169  | 0.328 | 0.13  | 9.47E-36   | 2 |
| <b>TNF</b>        | 7.13E-27 | -0.3365811 | 0.631 | 0.056 | 1.43E-23   | 2 |
| <b>CCL3L11</b>    | 5.02E-22 | -0.2796582 | 0.695 | 0.073 | 1.00E-18   | 2 |
| <b>LINC02446</b>  | 1.30E-18 | -0.2692474 | 0.818 | 0.239 | 2.61E-15   | 2 |
| <b>SNRPF</b>      | 6.75E-18 | -0.2952663 | 0.43  | 0.162 | 1.35E-14   | 2 |
| <b>HSH2D</b>      | 4.26E-16 | 0.28233956 | 0.413 | 0.12  | 8.52E-13   | 2 |
| <b>CCL3</b>       | 7.32E-15 | -0.4415959 | 0.797 | 0.236 | 1.46E-11   | 2 |
| <b>AC245014.3</b> | 5.55E-10 | -0.3733872 | 0.453 | 0.115 | 1.11E-06   | 2 |
| <b>ISG15</b>      | 1.74E-07 | 0.2538495  | 0.486 | 0.185 | 0.00034795 | 2 |
| <b>GZMA</b>       | 5.41E-07 | 0.33219671 | 0.996 | 0.705 | 0.00108159 | 2 |
| <b>IL7R</b>       | 6.21E-07 | -0.6216748 | 0.663 | 0.158 | 0.00124281 | 2 |
| <b>IFI6</b>       | 7.08E-07 | 0.34798704 | 0.462 | 0.102 | 0.00141569 | 2 |
| <b>MAP3K8</b>     | 2.43E-06 | -0.2554628 | 0.803 | 0.322 | 0.00485576 | 2 |
| <b>GADD45B</b>    | 4.79E-06 | -0.2970275 | 0.778 | 0.297 | 0.009583   | 2 |

|                    |            |            |       |       |            |   |
|--------------------|------------|------------|-------|-------|------------|---|
| <b>TUBB4B</b>      | 0.00012082 | -0.2568677 | 0.525 | 0.178 | 0.24163076 | 2 |
| <b>CCL4</b>        | 0.002782   | -0.5518276 | 0.998 | 0.573 | 1          | 2 |
| <b>HBA2</b>        | 0.00415507 | 0.28270697 | 0.101 | 0.003 | 1          | 2 |
| <b>HBB</b>         | 0.54290565 | 0.51817739 | 0.395 | 0.015 | 1          | 2 |
| <b>TNFAIP6</b>     | 3.18E-72   | -0.2725952 | 0.904 | 0.118 | 6.36E-69   | 3 |
| <b>PPBP</b>        | 2.64E-33   | -0.4000851 | 0.321 | 0.087 | 5.28E-30   | 3 |
| <b>AC103591.31</b> | 5.67E-13   | -0.4560859 | 0.84  | 0.275 | 1.13E-09   | 3 |
| <b>FCGR3A1</b>     | 1.18E-07   | -0.2809197 | 0.664 | 0.172 | 0.00023584 | 3 |
| <b>WARS</b>        | 4.12E-06   | -0.2640052 | 0.875 | 0.392 | 0.00823387 | 3 |
| <b>TMEM176A</b>    | 5.76E-06   | -0.2624806 | 0.64  | 0.451 | 0.01152516 | 3 |
| <b>IFITM3</b>      | 0.00052193 | -0.2655815 | 0.959 | 0.847 | 1          | 3 |
| <b>HLA-DRB5</b>    | 0.02522165 | -0.2597936 | 0.901 | 0.651 | 1          | 3 |
| <b>HLA-DPB1</b>    | 0.2864815  | -0.2816441 | 0.95  | 0.638 | 1          | 3 |
| <b>CALHM6</b>      | 0.80937266 | -0.2527273 | 0.904 | 0.564 | 1          | 3 |
| <b>GZMA1</b>       | 1.22E-69   | -0.3152751 | 0.937 | 0.117 | 2.43E-66   | 4 |
| <b>TRBV5-5</b>     | 2.12E-66   | 0.25276451 | 0.124 | 0.003 | 4.23E-63   | 4 |
| <b>TRAV38-2DV</b>  | 3.97E-46   | -0.2571413 | 0.783 | 0.021 | 7.94E-43   | 4 |
| <b>TRBV5-1</b>     | 5.60E-12   | -0.2644149 | 0.396 | 0.091 | 1.12E-08   | 4 |
| <b>PRDX1</b>       | 5.44E-10   | -0.3032759 | 0.939 | 0.374 | 1.09E-06   | 4 |
| <b>S100A11</b>     | 1.36E-09   | -0.4318213 | 0.907 | 0.338 | 2.72E-06   | 4 |
| <b>COTL11</b>      | 1.98E-08   | -0.3421936 | 0.904 | 0.821 | 3.95E-05   | 4 |
| <b>TRAV12-2</b>    | 3.67E-08   | -0.2569758 | 0.553 | 0.034 | 7.35E-05   | 4 |

|                    |            |            |       |       |            |   |
|--------------------|------------|------------|-------|-------|------------|---|
| <b>TRBV29-1</b>    | 2.00E-06   | 0.27143995 | 0.384 | 0.01  | 0.00399593 | 4 |
| <b>ERH</b>         | 2.06E-06   | -0.2637981 | 0.583 | 0.366 | 0.00412451 | 4 |
| <b>MIR4435-2HC</b> | 1.72E-05   | -0.3248017 | 0.732 | 0.216 | 0.03438748 | 4 |
| <b>S100A41</b>     | 3.93E-05   | -0.2778348 | 0.997 | 0.977 | 0.07851922 | 4 |
| <b>MT-CO1</b>      | 4.07E-05   | -0.3471755 | 1     | 1     | 0.08148604 | 4 |
| <b>PFN1</b>        | 0.0001659  | -0.2740778 | 0.997 | 0.987 | 0.33179006 | 4 |
| <b>PPIA</b>        | 0.0002323  | -0.2527187 | 0.97  | 0.932 | 0.46459488 | 4 |
| <b>GAPDH</b>       | 0.00024996 | -0.3133406 | 0.99  | 0.935 | 0.4999218  | 4 |
| <b>IL32</b>        | 0.00028043 | -0.3295136 | 1     | 0.971 | 0.56085457 | 4 |
| <b>ACTB</b>        | 0.0002853  | -0.3069968 | 1     | 1     | 0.5706013  | 4 |
| <b>TRBV10-3</b>    | 0.00034026 | -0.3294473 | 0.437 | 0.021 | 0.68052584 | 4 |
| <b>MT-CO3</b>      | 0.00056722 | -0.2665439 | 1     | 0.997 | 1          | 4 |
| <b>HMGB11</b>      | 0.00059017 | -0.2521351 | 0.98  | 0.878 | 1          | 4 |
| <b>S100A6</b>      | 0.00245604 | -0.3350419 | 0.982 | 0.948 | 1          | 4 |
| <b>ATP5MC3</b>     | 0.00798083 | -0.2727064 | 0.735 | 0.509 | 1          | 4 |
| <b>ABRACL</b>      | 0.01109681 | -0.259011  | 0.952 | 0.491 | 1          | 4 |
| <b>MT2A1</b>       | 0.01461511 | -0.753668  | 0.763 | 0.491 | 1          | 4 |
| <b>H1FX2</b>       | 0.02179396 | -0.4455924 | 0.937 | 0.504 | 1          | 4 |
| <b>SH2D1A</b>      | 0.02220763 | -0.2695314 | 0.533 | 0.156 | 1          | 4 |
| <b>DUSP21</b>      | 0.02591572 | -0.3152462 | 0.927 | 0.527 | 1          | 4 |
| <b>S100A82</b>     | 0.03523702 | -0.5715622 | 0.508 | 0.104 | 1          | 4 |

|                 |            |            |       |       |           |   |
|-----------------|------------|------------|-------|-------|-----------|---|
| <b>TRBV7-9</b>  | 0.04802129 | -0.3411901 | 0.48  | 0.06  | 1         | 4 |
| <b>HSPD1</b>    | 0.12483761 | -0.2648372 | 0.902 | 0.483 | 1         | 4 |
| <b>KLRB11</b>   | 0.22423523 | -0.3493222 | 0.775 | 0.481 | 1         | 4 |
| <b>MT1X</b>     | 0.33604698 | -0.2871342 | 0.596 | 0.21  | 1         | 4 |
| <b>CORO1B</b>   | 0.34005355 | -0.2982902 | 0.808 | 0.522 | 1         | 4 |
| <b>VDAC1</b>    | 0.34523689 | -0.2632472 | 0.697 | 0.353 | 1         | 4 |
| <b>STMN1</b>    | 0.46450804 | -0.2811464 | 0.578 | 0.114 | 1         | 4 |
| <b>TXN</b>      | 0.79397931 | -0.3021872 | 0.874 | 0.545 | 1         | 4 |
| <b>IGLV2-8</b>  | 1.54E-118  | -0.5271091 | 0.917 | 0.016 | 3.08E-115 | 5 |
| <b>IGLV6-57</b> | 1.38E-106  | -0.3837683 | 0.867 | 0.021 | 2.76E-103 | 5 |
| <b>IGKV2-29</b> | 1.77E-93   | -0.5655212 | 0.947 | 0.049 | 3.54E-90  | 5 |
| <b>MT2A2</b>    | 3.77E-91   | -0.7272862 | 0.96  | 0.061 | 7.55E-88  | 5 |
| <b>IGLV1-40</b> | 6.71E-84   | -0.4087359 | 0.927 | 0.047 | 1.34E-80  | 5 |
| <b>IGLV2-11</b> | 2.65E-81   | -0.3748275 | 0.87  | 0.035 | 5.30E-78  | 5 |
| <b>CST3</b>     | 1.52E-80   | -0.4171102 | 0.897 | 0.04  | 3.05E-77  | 5 |
| <b>IGLV1-51</b> | 7.66E-66   | -0.6322691 | 0.853 | 0.04  | 1.53E-62  | 5 |
| <b>IGHV3-49</b> | 3.26E-56   | 0.25218365 | 0.803 | 0.019 | 6.52E-53  | 5 |
| <b>IGKV1-9</b>  | 3.39E-49   | -0.2916503 | 0.74  | 0.021 | 6.78E-46  | 5 |
| <b>CNFN</b>     | 6.25E-49   | -0.3558497 | 0.93  | 0.143 | 1.25E-45  | 5 |
| <b>XIST2</b>    | 5.05E-47   | -0.414309  | 0.997 | 0.207 | 1.01E-43  | 5 |
| <b>IGHV1-3</b>  | 8.89E-44   | -0.2768013 | 0.773 | 0.021 | 1.78E-40  | 5 |
| <b>IFI44L2</b>  | 8.54E-42   | 0.4011261  | 0.22  | 0.021 | 1.71E-38  | 5 |

|                  |          |            |       |       |          |   |
|------------------|----------|------------|-------|-------|----------|---|
| <b>NCR3</b>      | 7.83E-40 | -0.2547645 | 0.873 | 0.124 | 1.57E-36 | 5 |
| <b>LINC01781</b> | 2.87E-37 | -0.4873064 | 0.957 | 0.209 | 5.74E-34 | 5 |
| <b>PPBP1</b>     | 1.49E-34 | -0.4242453 | 0.663 | 0.028 | 2.97E-31 | 5 |
| <b>HSPD11</b>    | 7.23E-29 | -0.2676769 | 0.907 | 0.204 | 1.45E-25 | 5 |
| <b>LGALS1</b>    | 7.86E-28 | -0.3269437 | 0.84  | 0.146 | 1.57E-24 | 5 |
| <b>GZMB</b>      | 1.13E-27 | 0.48284145 | 0.283 | 0.002 | 2.25E-24 | 5 |
| <b>GADD45B1</b>  | 4.92E-26 | 0.32849238 | 0.893 | 0.232 | 9.84E-23 | 5 |
| <b>HIST1H1D1</b> | 5.37E-23 | -0.2695228 | 0.9   | 0.228 | 1.07E-19 | 5 |
| <b>GPR183</b>    | 3.32E-18 | -0.2596122 | 0.877 | 0.239 | 6.63E-15 | 5 |
| <b>VDAC11</b>    | 2.44E-14 | -0.259065  | 0.76  | 0.143 | 4.87E-11 | 5 |
| <b>LINC01480</b> | 5.62E-14 | -0.3784361 | 0.74  | 0.124 | 1.12E-10 | 5 |
| <b>PA2G4</b>     | 1.78E-13 | -0.3128779 | 0.82  | 0.218 | 3.56E-10 | 5 |
| <b>S100A10</b>   | 3.70E-13 | -0.4859162 | 0.953 | 0.345 | 7.39E-10 | 5 |
| <b>S100A83</b>   | 5.53E-13 | -1.1892745 | 0.403 | 0.131 | 1.11E-09 | 5 |
| <b>ID3</b>       | 1.04E-11 | -0.3936996 | 0.71  | 0.106 | 2.07E-08 | 5 |
| <b>HIST1H1E</b>  | 3.19E-11 | -0.366242  | 0.987 | 0.39  | 6.37E-08 | 5 |
| <b>IGLV2-14</b>  | 6.49E-11 | -0.5533299 | 0.68  | 0.075 | 1.30E-07 | 5 |
| <b>IGLV3-21</b>  | 8.87E-11 | -0.2832448 | 0.38  | 0.033 | 1.77E-07 | 5 |
| <b>PNOC</b>      | 9.14E-11 | -0.2924034 | 0.73  | 0.138 | 1.83E-07 | 5 |
| <b>H1FX3</b>     | 1.79E-09 | -0.4806624 | 0.923 | 0.354 | 3.58E-06 | 5 |
| <b>SOX4</b>      | 2.40E-09 | 0.55149533 | 0.637 | 0.035 | 4.81E-06 | 5 |



|                    |            |            |       |       |            |   |
|--------------------|------------|------------|-------|-------|------------|---|
| <b>S100A42</b>     | 2.92E-09   | -0.5953525 | 0.927 | 0.354 | 5.85E-06   | 5 |
| <b>WDR74</b>       | 4.34E-08   | -0.2994122 | 0.867 | 0.333 | 8.68E-05   | 5 |
| <b>SMIM14</b>      | 1.61E-07   | -0.3576151 | 0.763 | 0.214 | 0.00032199 | 5 |
| <b>AC103591.32</b> | 2.84E-07   | -0.3160666 | 0.82  | 0.308 | 0.00056792 | 5 |
| <b>CD79B</b>       | 3.17E-07   | -0.2567043 | 0.983 | 0.453 | 0.00063481 | 5 |
| <b>AC020916.12</b> | 3.41E-07   | -0.2581518 | 0.65  | 0.075 | 0.00068213 | 5 |
| <b>PSMA3</b>       | 1.03E-06   | 0.27568571 | 0.423 | 0.061 | 0.00206674 | 5 |
| <b>IGKV3-20</b>    | 1.46E-06   | -0.8342068 | 0.647 | 0.08  | 0.00291414 | 5 |
| <b>FAM30A</b>      | 3.90E-06   | -0.3612965 | 0.757 | 0.23  | 0.00779826 | 5 |
| <b>IGLV3-1</b>     | 1.25E-05   | -0.6484364 | 0.617 | 0.049 | 0.02491545 | 5 |
| <b>MT-ND4L</b>     | 8.80E-05   | 0.25399291 | 1     | 0.93  | 0.17596217 | 5 |
| <b>S100A61</b>     | 0.00034357 | -0.366883  | 0.877 | 0.406 | 0.68713307 | 5 |
| <b>IGKV3-11</b>    | 0.00105717 | -0.3894642 | 0.603 | 0.068 | 1          | 5 |
| <b>HSPA5</b>       | 0.00166982 | 0.36890767 | 0.72  | 0.296 | 1          | 5 |
| <b>TIMP1</b>       | 0.06158031 | -0.2696278 | 0.44  | 0.047 | 1          | 5 |
| <b>IGKV3-15</b>    | 0.08817144 | -0.5925174 | 0.59  | 0.099 | 1          | 5 |
| <b>AC233755.1</b>  | 0.12564322 | -0.3402054 | 0.303 | 0.023 | 1          | 5 |
| <b>HMGB2</b>       | 0.22575392 | -0.3680774 | 0.65  | 0.204 | 1          | 5 |
| <b>TMEM1561</b>    | 0.32477835 | -0.3540786 | 0.713 | 0.298 | 1          | 5 |
| <b>IGHV4-39</b>    | 0.42234406 | -0.3638993 | 0.497 | 0.035 | 1          | 5 |
| <b>IGKC</b>        | 0.4510412  | -0.3954849 | 0.667 | 0.317 | 1          | 5 |
| <b>COTL12</b>      | 0.48280412 | -0.344594  | 0.727 | 0.399 | 1          | 5 |

|                   |            |            |       |       |          |   |
|-------------------|------------|------------|-------|-------|----------|---|
| <b>IFITM22</b>    | 0.54284166 | -0.3139542 | 0.767 | 0.383 | 1        | 5 |
| <b>PLPP5</b>      | 0.8393866  | -0.33547   | 0.693 | 0.317 | 1        | 5 |
| <b>HIST1H4C</b>   | 0.89814909 | -0.2606485 | 0.677 | 0.298 | 1        | 5 |
| <b>TRBV6-2</b>    | 3.49E-60   | 0.38040707 | 0.903 | 0.005 | 6.98E-57 | 6 |
| <b>PRDX11</b>     | 1.52E-57   | -0.257429  | 0.984 | 0.049 | 3.03E-54 | 6 |
| <b>JAML</b>       | 3.09E-54   | -0.302276  | 0.962 | 0.039 | 6.17E-51 | 6 |
| <b>YWHAQ</b>      | 6.78E-49   | 0.32556495 | 0.968 | 0.069 | 1.36E-45 | 6 |
| <b>CORO1B1</b>    | 1.50E-47   | -0.3904933 | 0.957 | 0.078 | 3.00E-44 | 6 |
| <b>IFNG</b>       | 3.50E-46   | -0.3849829 | 0.844 | 0.049 | 6.99E-43 | 6 |
| <b>ATP2B1-AS1</b> | 5.53E-46   | -0.3222308 | 0.973 | 0.083 | 1.11E-42 | 6 |
| <b>JPT1</b>       | 6.60E-46   | -0.3661186 | 0.962 | 0.074 | 1.32E-42 | 6 |
| <b>GZMK1</b>      | 1.19E-45   | -0.7365507 | 0.989 | 0.098 | 2.39E-42 | 6 |
| <b>CTSC1</b>      | 8.58E-44   | -0.2578365 | 0.984 | 0.103 | 1.72E-40 | 6 |
| <b>Z93241.1</b>   | 9.45E-44   | -0.4950503 | 0.952 | 0.074 | 1.89E-40 | 6 |
| <b>KLF10</b>      | 1.38E-43   | -0.4236013 | 0.973 | 0.093 | 2.77E-40 | 6 |
| <b>ADTRP</b>      | 4.67E-43   | -0.424142  | 0.124 | 0.034 | 9.34E-40 | 6 |
| <b>EGR1</b>       | 1.70E-40   | -0.5904567 | 0.952 | 0.088 | 3.40E-37 | 6 |
| <b>ID1</b>        | 2.69E-39   | -0.2838278 | 0.876 | 0.025 | 5.39E-36 | 6 |
| <b>TUBA1B</b>     | 4.02E-39   | -0.4062606 | 1     | 0.137 | 8.04E-36 | 6 |
| <b>GZMA2</b>      | 7.88E-39   | -0.7532343 | 0.93  | 0.093 | 1.58E-35 | 6 |
| <b>NOLC1</b>      | 2.77E-38   | -0.2777652 | 0.129 | 0.044 | 5.55E-35 | 6 |

|                    |          |            |       |       |          |   |
|--------------------|----------|------------|-------|-------|----------|---|
| <b>ATF5</b>        | 1.00E-37 | 0.2640318  | 0.145 | 0.005 | 2.01E-34 | 6 |
| <b>PDCD5</b>       | 1.98E-37 | -0.4605915 | 0.882 | 0.078 | 3.96E-34 | 6 |
| <b>LAT</b>         | 1.47E-36 | -0.3357465 | 0.989 | 0.142 | 2.94E-33 | 6 |
| <b>UBA5</b>        | 2.84E-36 | 0.25565673 | 0.758 | 0.01  | 5.69E-33 | 6 |
| <b>SELL</b>        | 1.58E-34 | -0.2621794 | 0.957 | 0.127 | 3.16E-31 | 6 |
| <b>CYTOR</b>       | 5.43E-34 | -0.3132971 | 0.935 | 0.108 | 1.09E-30 | 6 |
| <b>HIST1H4C1</b>   | 1.08E-32 | -0.5880159 | 0.984 | 0.157 | 2.16E-29 | 6 |
| <b>MIR4435-2HC</b> | 6.60E-32 | -0.273476  | 0.726 | 0.039 | 1.32E-28 | 6 |
| <b>CDC25B</b>      | 6.50E-31 | -0.2618881 | 0.892 | 0.083 | 1.30E-27 | 6 |
| <b>ATAD5</b>       | 1.39E-30 | 0.30210775 | 0.145 | 0     | 2.78E-27 | 6 |
| <b>CCND2</b>       | 1.33E-29 | 0.27963436 | 0.903 | 0.108 | 2.67E-26 | 6 |
| <b>MX11</b>        | 4.81E-29 | 0.52361839 | 0.188 | 0.015 | 9.63E-26 | 6 |
| <b>PSMA4</b>       | 8.02E-29 | -0.2783888 | 0.866 | 0.069 | 1.60E-25 | 6 |
| <b>EIF4A3</b>      | 1.72E-28 | -0.2800785 | 0.887 | 0.093 | 3.43E-25 | 6 |
| <b>PSMB2</b>       | 5.72E-27 | 0.26750866 | 0.21  | 0.039 | 1.14E-23 | 6 |
| <b>IFI61</b>       | 1.20E-26 | 0.26134328 | 0.21  | 0.039 | 2.41E-23 | 6 |
| <b>TGFBR3</b>      | 2.71E-26 | -0.3212826 | 0.199 | 0.054 | 5.42E-23 | 6 |
| <b>TRAC</b>        | 7.15E-25 | 0.33856508 | 0.22  | 0.02  | 1.43E-21 | 6 |
| <b>HLA-DRB1</b>    | 1.00E-24 | -0.4793362 | 0.903 | 0.132 | 2.00E-21 | 6 |
| <b>LST1</b>        | 2.28E-24 | -0.3077632 | 0.554 | 0.02  | 4.56E-21 | 6 |
| <b>AC020916.13</b> | 2.97E-24 | -0.3046117 | 0.586 | 0.044 | 5.93E-21 | 6 |
| <b>TSHZ2</b>       | 5.72E-24 | 0.35753404 | 0.882 | 0.127 | 1.14E-20 | 6 |

|                    |          |            |       |       |          |   |
|--------------------|----------|------------|-------|-------|----------|---|
| <b>CCL5</b>        | 6.46E-21 | -0.4264455 | 0.919 | 0.176 | 1.29E-17 | 6 |
| <b>S100A101</b>    | 7.49E-21 | -0.4493582 | 0.946 | 0.201 | 1.50E-17 | 6 |
| <b>IFI44L3</b>     | 7.99E-21 | 0.60827709 | 0.247 | 0.025 | 1.60E-17 | 6 |
| <b>TNF1</b>        | 4.25E-20 | -0.3627714 | 0.258 | 0.064 | 8.50E-17 | 6 |
| <b>HSH2D1</b>      | 4.64E-20 | 0.25975144 | 0.253 | 0.025 | 9.27E-17 | 6 |
| <b>H2AFV</b>       | 3.50E-19 | 0.33963601 | 0.844 | 0.127 | 7.00E-16 | 6 |
| <b>TOMM40</b>      | 6.38E-19 | 0.38250689 | 0.226 | 0     | 1.28E-15 | 6 |
| <b>MT2A3</b>       | 1.93E-18 | -0.400958  | 0.812 | 0.088 | 3.85E-15 | 6 |
| <b>TRBC1</b>       | 4.99E-18 | 0.30483404 | 0.274 | 0.049 | 9.97E-15 | 6 |
| <b>AC103591.33</b> | 1.09E-17 | -0.5608945 | 0.301 | 0.152 | 2.18E-14 | 6 |
| <b>TRBV4-2</b>     | 1.11E-17 | 0.40943188 | 0.581 | 0.01  | 2.21E-14 | 6 |
| <b>MARCKSL1</b>    | 1.38E-17 | -0.2521551 | 0.489 | 0.029 | 2.76E-14 | 6 |
| <b>C1QBP</b>       | 2.92E-17 | 0.31731432 | 0.753 | 0.034 | 5.84E-14 | 6 |
| <b>MCM6</b>        | 3.14E-17 | 0.37520131 | 0.737 | 0.01  | 6.28E-14 | 6 |
| <b>SNAP23</b>      | 1.45E-16 | 0.25409026 | 0.263 | 0.01  | 2.90E-13 | 6 |
| <b>ANXA2R</b>      | 2.28E-16 | -0.3976237 | 0.763 | 0.054 | 4.55E-13 | 6 |
| <b>GTF3C6</b>      | 3.58E-16 | -0.3561281 | 0.742 | 0.044 | 7.16E-13 | 6 |
| <b>MAP3K81</b>     | 4.31E-16 | -0.2740125 | 0.296 | 0.074 | 8.61E-13 | 6 |
| <b>ITM2A</b>       | 5.46E-16 | 0.39827073 | 0.801 | 0.108 | 1.09E-12 | 6 |
| <b>TRBV24-1</b>    | 4.27E-15 | -0.2513829 | 0.269 | 0.015 | 8.53E-12 | 6 |
| <b>MAFF</b>        | 7.51E-15 | -0.2514316 | 0.742 | 0.039 | 1.50E-11 | 6 |

|                  |          |            |       |       |            |   |
|------------------|----------|------------|-------|-------|------------|---|
| <b>HIST1H1D2</b> | 3.87E-14 | -0.3904309 | 1     | 0.304 | 7.73E-11   | 6 |
| <b>PPA1</b>      | 9.45E-14 | 0.27084431 | 0.731 | 0.039 | 1.89E-10   | 6 |
| <b>TRBV19</b>    | 6.73E-13 | 0.27054273 | 0.688 | 0.015 | 1.35E-09   | 6 |
| <b>DNMT1</b>     | 7.10E-13 | -0.281659  | 0.737 | 0.054 | 1.42E-09   | 6 |
| <b>IL7R1</b>     | 8.45E-13 | 0.68510013 | 1     | 0.451 | 1.69E-09   | 6 |
| <b>ACAT2</b>     | 1.54E-12 | -0.2798823 | 0.715 | 0.034 | 3.07E-09   | 6 |
| <b>RPN1</b>      | 1.57E-12 | 0.32585792 | 0.753 | 0.083 | 3.14E-09   | 6 |
| <b>APOBEC3G</b>  | 3.77E-11 | -0.2591903 | 0.387 | 0.02  | 7.53E-08   | 6 |
| <b>TRBV12-3</b>  | 1.27E-10 | -0.253282  | 0.145 | 0.005 | 2.54E-07   | 6 |
| <b>PRF1</b>      | 1.27E-10 | -0.3722485 | 0.661 | 0.049 | 2.55E-07   | 6 |
| <b>CTSW</b>      | 1.74E-10 | -0.6266122 | 0.355 | 0.093 | 3.48E-07   | 6 |
| <b>SGK11</b>     | 3.70E-10 | -0.2776648 | 0.36  | 0.103 | 7.41E-07   | 6 |
| <b>SRP9</b>      | 8.39E-10 | -0.290805  | 0.36  | 0.088 | 1.68E-06   | 6 |
| <b>IFNG-AS1</b>  | 6.38E-09 | -0.2592611 | 0.661 | 0.029 | 1.28E-05   | 6 |
| <b>MIF</b>       | 6.44E-09 | -0.3913002 | 0.78  | 0.157 | 1.29E-05   | 6 |
| <b>PRDM11</b>    | 6.83E-09 | 0.2644473  | 0.919 | 0.348 | 1.37E-05   | 6 |
| <b>IDH2</b>      | 3.16E-08 | 0.38140504 | 0.683 | 0.049 | 6.32E-05   | 6 |
| <b>ENC1</b>      | 3.49E-08 | -0.2847398 | 0.14  | 0.044 | 6.98E-05   | 6 |
| <b>RRM1</b>      | 3.83E-08 | 0.34130183 | 0.672 | 0.034 | 7.65E-05   | 6 |
| <b>TRBV20-1</b>  | 6.84E-08 | -0.5602933 | 0.376 | 0.069 | 0.0001369  | 6 |
| <b>HMGB12</b>    | 1.52E-07 | -0.5019731 | 0.575 | 0.485 | 0.00030388 | 6 |
| <b>HIST1H2BC</b> | 1.66E-07 | -0.3834393 | 0.237 | 0.034 | 0.00033275 | 6 |

|                |            |            |       |       |            |   |
|----------------|------------|------------|-------|-------|------------|---|
| <b>CCL41</b>   | 2.30E-07   | -0.9450276 | 0.441 | 0.078 | 0.00045997 | 6 |
| <b>KLRG1</b>   | 3.01E-06   | -0.4544733 | 0.409 | 0.098 | 0.00602135 | 6 |
| <b>HNRNPF</b>  | 3.59E-06   | 0.28240024 | 0.645 | 0.029 | 0.00717831 | 6 |
| <b>DUSP22</b>  | 4.44E-06   | -0.5131936 | 0.978 | 0.402 | 0.00888219 | 6 |
| <b>CST7</b>    | 5.64E-06   | -0.3643069 | 0.688 | 0.093 | 0.01127941 | 6 |
| <b>CCL4L21</b> | 1.60E-05   | -0.2833039 | 0.188 | 0.015 | 0.03201661 | 6 |
| <b>HLA-DRA</b> | 1.92E-05   | -0.3720366 | 0.29  | 0.039 | 0.03844229 | 6 |
| <b>CITED2</b>  | 1.99E-05   | -0.4256218 | 0.694 | 0.113 | 0.03973177 | 6 |
| <b>HSPE1</b>   | 4.01E-05   | -0.3490033 | 0.419 | 0.083 | 0.08018681 | 6 |
| <b>ANXA11</b>  | 6.92E-05   | 0.28888216 | 0.651 | 0.069 | 0.13849447 | 6 |
| <b>LDHA</b>    | 9.15E-05   | -0.3318289 | 0.78  | 0.235 | 0.18292824 | 6 |
| <b>TUFM</b>    | 0.00011023 | 0.27165287 | 0.409 | 0.039 | 0.22046147 | 6 |
| <b>FTH1</b>    | 0.00011903 | 0.40356697 | 0.984 | 0.554 | 0.23805346 | 6 |
| <b>NRIP1</b>   | 0.00017523 | 0.27312205 | 0.328 | 0.01  | 0.35046335 | 6 |
| <b>PSMB9</b>   | 0.00017676 | -0.5446004 | 0.446 | 0.118 | 0.35352323 | 6 |
| <b>GBP1</b>    | 0.00023046 | -0.2863188 | 0.559 | 0.059 | 0.46092668 | 6 |
| <b>DTHD1</b>   | 0.00081697 | -0.2834755 | 0.296 | 0.054 | 1          | 6 |
| <b>RAN</b>     | 0.00099982 | -0.2719777 | 0.473 | 0.152 | 1          | 6 |
| <b>NCF1</b>    | 0.00136081 | -0.3380007 | 0.435 | 0.054 | 1          | 6 |
| <b>MIR22HG</b> | 0.00147834 | -0.3083995 | 0.602 | 0.034 | 1          | 6 |
| <b>CD7</b>     | 0.00163636 | 0.27306621 | 0.629 | 0.074 | 1          | 6 |

|                  |            |            |       |       |   |   |
|------------------|------------|------------|-------|-------|---|---|
| <b>NKG7</b>      | 0.00173433 | -0.5447433 | 0.586 | 0.093 | 1 | 6 |
| <b>BCL2A1</b>    | 0.00175957 | -0.3903807 | 0.613 | 0.049 | 1 | 6 |
| <b>GALM</b>      | 0.00221424 | -0.3219767 | 0.43  | 0.044 | 1 | 6 |
| <b>CALU</b>      | 0.00306953 | -0.3118233 | 0.435 | 0.044 | 1 | 6 |
| <b>HSPA8</b>     | 0.00424648 | -0.3369678 | 0.516 | 0.216 | 1 | 6 |
| <b>TMSB4X</b>    | 0.00452586 | 0.32817996 | 0.989 | 0.569 | 1 | 6 |
| <b>MAL</b>       | 0.01160955 | -0.2631215 | 0.457 | 0.059 | 1 | 6 |
| <b>CD69</b>      | 0.02499701 | -0.3681255 | 0.919 | 0.75  | 1 | 6 |
| <b>TIMP11</b>    | 0.04961663 | -0.2646063 | 0.527 | 0.049 | 1 | 6 |
| <b>CRTAM</b>     | 0.05005667 | -0.3350929 | 0.183 | 0.034 | 1 | 6 |
| <b>NCL</b>       | 0.06078309 | -0.2758884 | 0.575 | 0.26  | 1 | 6 |
| <b>ZFP36</b>     | 0.06531404 | -0.2654109 | 0.989 | 0.608 | 1 | 6 |
| <b>TRBV9</b>     | 0.06742527 | -0.2728394 | 0.296 | 0.015 | 1 | 6 |
| <b>PFN11</b>     | 0.09132936 | -0.3691796 | 0.737 | 0.289 | 1 | 6 |
| <b>HNRNPA2B1</b> | 0.09868096 | -0.2568407 | 0.774 | 0.569 | 1 | 6 |
| <b>AREG2</b>     | 0.10891259 | -0.5844084 | 0.608 | 0.108 | 1 | 6 |
| <b>ALG5</b>      | 0.13223451 | 0.25118828 | 0.538 | 0.015 | 1 | 6 |
| <b>SNRPG</b>     | 0.13703866 | -0.353354  | 0.608 | 0.113 | 1 | 6 |
| <b>MT-ND61</b>   | 0.13771437 | -0.5033379 | 0.731 | 0.289 | 1 | 6 |
| <b>NR4A21</b>    | 0.20335228 | -0.7508861 | 0.591 | 0.23  | 1 | 6 |
| <b>CANX</b>      | 0.29290559 | -0.3457761 | 0.532 | 0.123 | 1 | 6 |
| <b>MT-ATP8</b>   | 0.32737376 | -0.4809918 | 1     | 0.681 | 1 | 6 |

|                    |            |            |       |       |            |   |
|--------------------|------------|------------|-------|-------|------------|---|
| <b>HSPA51</b>      | 0.36685604 | -0.4202657 | 0.694 | 0.397 | 1          | 6 |
| <b>HACD3</b>       | 0.61063573 | 0.28996237 | 0.306 | 0.015 | 1          | 6 |
| <b>CORO1A</b>      | 0.62420497 | -0.3769576 | 0.581 | 0.176 | 1          | 6 |
| <b>PASK</b>        | 0.66560219 | -0.3361597 | 0.5   | 0.039 | 1          | 6 |
| <b>CD8A</b>        | 0.6707684  | -0.302769  | 0.548 | 0.078 | 1          | 6 |
| <b>TMPO</b>        | 0.74265862 | 0.64558196 | 0.511 | 0.044 | 1          | 6 |
| <b>TUBA4A</b>      | 0.81939869 | -0.2837867 | 0.559 | 0.127 | 1          | 6 |
| <b>MIR181A1HC</b>  | 0.8980611  | -0.3804386 | 0.543 | 0.088 | 1          | 6 |
| <b>TIMM50</b>      | 0.95098386 | 0.32435544 | 0.505 | 0.015 | 1          | 6 |
| <b>HLA-DQA1</b>    | 1.98E-14   | -0.2689229 | 0.894 | 0.198 | 3.96E-11   | 7 |
| <b>KLRB12</b>      | 2.08E-12   | -0.3414921 | 0.331 | 0.129 | 4.15E-09   | 7 |
| <b>TRGV2</b>       | 4.46E-11   | -0.2674919 | 0.894 | 0.233 | 8.91E-08   | 7 |
| <b>CCL4L22</b>     | 2.25E-08   | -0.6311913 | 0.972 | 0.337 | 4.50E-05   | 7 |
| <b>XCL11</b>       | 6.21E-07   | 0.49983958 | 0.725 | 0.129 | 0.00124237 | 7 |
| <b>ANXA2</b>       | 3.39E-06   | 0.30753489 | 0.88  | 0.366 | 0.00678622 | 7 |
| <b>AL138963.31</b> | 1.07E-05   | 0.25375322 | 0.415 | 0.163 | 0.02139786 | 7 |
| <b>TRBC11</b>      | 0.00021725 | -0.2643921 | 0.521 | 0.337 | 0.43449351 | 7 |
| <b>S100A84</b>     | 0.00159655 | -0.4551409 | 0.451 | 0.104 | 1          | 7 |
| <b>PPBP2</b>       | 0.01141139 | 0.3277552  | 0.57  | 0.03  | 1          | 7 |
| <b>GNLY</b>        | 0.02629125 | -0.4790033 | 0.782 | 0.317 | 1          | 7 |
| <b>IL7R2</b>       | 0.31402829 | -0.270252  | 0.81  | 0.436 | 1          | 7 |



|                    |            |            |       |       |            |   |
|--------------------|------------|------------|-------|-------|------------|---|
| <b>CCL42</b>       | 0.61699665 | -0.3361786 | 1     | 0.757 | 1          | 7 |
| <b>GZMB1</b>       | 0.67874492 | -0.4214924 | 0.704 | 0.312 | 1          | 7 |
| <b>GZMH</b>        | 0.8519085  | -0.299485  | 0.923 | 0.609 | 1          | 7 |
| <b>PLEK</b>        | 0.92333037 | -0.2793711 | 0.908 | 0.535 | 1          | 7 |
| <b>IL6</b>         | 2.10E-37   | 0.30277417 | 0.898 | 0.011 | 4.19E-34   | 8 |
| <b>STAB1</b>       | 2.08E-20   | 0.29974668 | 0.205 | 0.011 | 4.17E-17   | 8 |
| <b>CD691</b>       | 2.79E-15   | -0.2544464 | 0.875 | 0.126 | 5.57E-12   | 8 |
| <b>AREG3</b>       | 2.12E-10   | -0.266209  | 0.989 | 0.282 | 4.23E-07   | 8 |
| <b>CCL20</b>       | 5.19E-08   | 0.28071251 | 0.455 | 0.011 | 0.00010373 | 8 |
| <b>HLA-DRB51</b>   | 4.42E-05   | 0.35337295 | 0.909 | 0.552 | 0.08849479 | 8 |
| <b>MT-ATP81</b>    | 9.29E-05   | 0.26173942 | 1     | 0.534 | 0.18573283 | 8 |
| <b>XIST3</b>       | 0.00013229 | -0.2871152 | 0.875 | 0.282 | 0.26457324 | 8 |
| <b>FERMT3</b>      | 0.00021202 | -0.2882889 | 0.545 | 0.385 | 0.42404426 | 8 |
| <b>HLA-DPB11</b>   | 0.00022052 | 0.31532028 | 0.989 | 0.724 | 0.44104292 | 8 |
| <b>MT2A4</b>       | 0.00023692 | -0.3626535 | 1     | 0.977 | 0.47384447 | 8 |
| <b>RNF144B</b>     | 0.00037757 | 0.32282509 | 0.943 | 0.471 | 0.75513695 | 8 |
| <b>CD74</b>        | 0.00047452 | 0.34540536 | 0.989 | 0.983 | 0.94904371 | 8 |
| <b>CCT8</b>        | 0.00052393 | -0.2964117 | 0.545 | 0.379 | 1          | 8 |
| <b>AL138963.32</b> | 0.00055646 | 0.49230975 | 0.42  | 0.144 | 1          | 8 |
| <b>C1QC1</b>       | 0.00063378 | -0.3610573 | 0.977 | 0.425 | 1          | 8 |
| <b>GSTP1</b>       | 0.00085525 | -0.2792257 | 0.977 | 0.948 | 1          | 8 |
| <b>HLA-DRA1</b>    | 0.00093218 | 0.32400543 | 1     | 0.925 | 1          | 8 |

|                  |            |            |       |       |   |   |
|------------------|------------|------------|-------|-------|---|---|
| <b>HLA-DPA1</b>  | 0.00099922 | 0.26934468 | 1     | 0.856 | 1 | 8 |
| <b>MS4A6A</b>    | 0.00112279 | 0.30018772 | 0.818 | 0.397 | 1 | 8 |
| <b>BLVRB</b>     | 0.00117175 | -0.3982349 | 0.784 | 0.684 | 1 | 8 |
| <b>RANBP1</b>    | 0.00135846 | -0.2927951 | 0.545 | 0.339 | 1 | 8 |
| <b>MT-ND4L1</b>  | 0.00304515 | 0.2646899  | 0.989 | 0.943 | 1 | 8 |
| <b>NINJ1</b>     | 0.00335703 | 0.26238871 | 0.875 | 0.603 | 1 | 8 |
| <b>CD163</b>     | 0.00774364 | -0.3073751 | 0.943 | 0.414 | 1 | 8 |
| <b>HSPE11</b>    | 0.00981685 | -0.296381  | 0.932 | 0.391 | 1 | 8 |
| <b>ETS2</b>      | 0.01647712 | -0.2835912 | 0.875 | 0.695 | 1 | 8 |
| <b>IGSF6</b>     | 0.01846499 | 0.25678201 | 0.898 | 0.667 | 1 | 8 |
| <b>TIMP12</b>    | 0.02488218 | -0.3533118 | 1     | 0.989 | 1 | 8 |
| <b>SULT1A1</b>   | 0.02835858 | 0.28582177 | 0.727 | 0.293 | 1 | 8 |
| <b>HPRT1</b>     | 0.03507271 | -0.2665514 | 0.568 | 0.264 | 1 | 8 |
| <b>S100A85</b>   | 0.0370919  | -0.2778901 | 0.955 | 0.897 | 1 | 8 |
| <b>H1FX4</b>     | 0.04507163 | -0.2726025 | 0.648 | 0.471 | 1 | 8 |
| <b>RPS27L</b>    | 0.05451594 | -0.2664178 | 0.966 | 0.799 | 1 | 8 |
| <b>MTRNR2L12</b> | 0.05760253 | 0.27674092 | 0.989 | 0.862 | 1 | 8 |
| <b>SLC25A25</b>  | 0.06546698 | -0.2972673 | 0.773 | 0.58  | 1 | 8 |
| <b>FBP1</b>      | 0.09117027 | -0.2747241 | 0.75  | 0.575 | 1 | 8 |
| <b>SSR4</b>      | 0.09176755 | -0.2723833 | 0.886 | 0.69  | 1 | 8 |
| <b>JAML1</b>     | 0.18387421 | 0.28284613 | 0.648 | 0.23  | 1 | 8 |

|                  |            |            |       |       |          |   |
|------------------|------------|------------|-------|-------|----------|---|
| <b>XRCC5</b>     | 0.24623558 | -0.2532583 | 0.92  | 0.477 | 1        | 8 |
| <b>MT1E</b>      | 0.26387712 | -0.5262534 | 0.682 | 0.374 | 1        | 8 |
| <b>IL1B1</b>     | 0.30048307 | 0.4531563  | 0.545 | 0.305 | 1        | 8 |
| <b>TMEM14C</b>   | 0.46712143 | -0.3096538 | 0.977 | 0.523 | 1        | 8 |
| <b>CXCL2</b>     | 0.57455038 | 0.46700804 | 0.614 | 0.207 | 1        | 8 |
| <b>CKLF</b>      | 0.63113489 | -0.2946861 | 0.795 | 0.385 | 1        | 8 |
| <b>HMGB21</b>    | 0.76234978 | -0.3195183 | 1     | 0.598 | 1        | 8 |
| <b>IFI271</b>    | 0.82663273 | -0.750534  | 1     | 0.58  | 1        | 8 |
| <b>TMEM176B</b>  | 0.95836779 | 0.3137295  | 0.545 | 0.195 | 1        | 8 |
| <b>DUSP61</b>    | 4.07E-40   | 0.38946463 | 0.99  | 0.009 | 8.14E-37 | 9 |
| <b>IGKV2-291</b> | 1.26E-38   | -0.7382866 | 1     | 0.026 | 2.52E-35 | 9 |
| <b>SERPINA1</b>  | 2.63E-38   | 0.49638507 | 0.96  | 0.009 | 5.26E-35 | 9 |
| <b>IGKV2-30</b>  | 3.79E-37   | -3.6754025 | 1     | 0.034 | 7.57E-34 | 9 |
| <b>IGHV3-15</b>  | 2.96E-34   | -2.4454987 | 0.939 | 0.026 | 5.93E-31 | 9 |
| <b>IGKV1-5</b>   | 9.98E-34   | -3.8694949 | 0.98  | 0.043 | 2.00E-30 | 9 |
| <b>HIST1H2AL</b> | 3.26E-32   | -0.4951432 | 0.051 | 0.103 | 6.53E-29 | 9 |
| <b>IGHV4-59</b>  | 5.46E-31   | -0.3722079 | 0.96  | 0.043 | 1.09E-27 | 9 |
| <b>IGHV1-2</b>   | 1.89E-30   | -3.7205117 | 1     | 0.077 | 3.78E-27 | 9 |
| <b>IGHV1-18</b>  | 2.48E-30   | -3.2722683 | 0.99  | 0.068 | 4.97E-27 | 9 |
| <b>IGLV3-25</b>  | 5.38E-30   | -0.8156787 | 0.909 | 0.009 | 1.08E-26 | 9 |
| <b>NR4A22</b>    | 2.66E-29   | 0.65880431 | 0.99  | 0.077 | 5.32E-26 | 9 |
| <b>HIST1H2AG</b> | 3.85E-29   | -0.3099789 | 0.99  | 0.077 | 7.70E-26 | 9 |

|                  |          |            |       |       |          |   |
|------------------|----------|------------|-------|-------|----------|---|
| <b>HIST1H2BF</b> | 5.37E-29 | -0.2855607 | 0.939 | 0.06  | 1.07E-25 | 9 |
| <b>SLAMF7</b>    | 1.94E-28 | -0.3485301 | 0.091 | 0.256 | 3.89E-25 | 9 |
| <b>TUBB4B1</b>   | 4.61E-28 | -0.6049268 | 0.101 | 0.222 | 9.23E-25 | 9 |
| <b>IGHV3-74</b>  | 4.85E-28 | -1.3458273 | 0.101 | 0.06  | 9.69E-25 | 9 |
| <b>DUT</b>       | 6.39E-28 | -0.4250906 | 0.101 | 0.222 | 1.28E-24 | 9 |
| <b>NASP</b>      | 1.18E-27 | -0.4095451 | 0.101 | 0.248 | 2.36E-24 | 9 |
| <b>HBB1</b>      | 2.23E-27 | 3.84888163 | 0.869 | 0     | 4.45E-24 | 9 |
| <b>CYC1</b>      | 2.36E-27 | -0.2709477 | 0.101 | 0.248 | 4.73E-24 | 9 |
| <b>PSMA6</b>     | 3.58E-27 | -0.409073  | 0.111 | 0.291 | 7.15E-24 | 9 |
| <b>SLC25A37</b>  | 8.28E-27 | 0.3697303  | 0.111 | 0.043 | 1.66E-23 | 9 |
| <b>UBE2S</b>     | 9.21E-27 | -0.2617257 | 0.111 | 0.137 | 1.84E-23 | 9 |
| <b>HIST1H2AM</b> | 1.80E-26 | -0.2812148 | 0.97  | 0.094 | 3.60E-23 | 9 |
| <b>H1FX5</b>     | 3.26E-26 | -0.889141  | 0.111 | 0.376 | 6.51E-23 | 9 |
| <b>IGKV1-91</b>  | 3.58E-26 | -3.2462389 | 0.889 | 0.051 | 7.15E-23 | 9 |
| <b>NDUFAF3</b>   | 4.52E-26 | -0.3362021 | 0.121 | 0.316 | 9.05E-23 | 9 |
| <b>TIMM10</b>    | 4.77E-26 | -0.2924141 | 0.121 | 0.222 | 9.53E-23 | 9 |
| <b>CCT2</b>      | 5.12E-26 | -0.2830642 | 0.111 | 0.265 | 1.02E-22 | 9 |
| <b>SEC61G1</b>   | 5.44E-26 | -1.1712902 | 0.121 | 0.504 | 1.09E-22 | 9 |
| <b>SEC13</b>     | 5.83E-26 | -0.5551329 | 0.121 | 0.342 | 1.17E-22 | 9 |
| <b>TXNDC17</b>   | 6.02E-26 | -0.5295495 | 0.121 | 0.316 | 1.20E-22 | 9 |
| <b>HSPE12</b>    | 7.77E-26 | -0.7111097 | 0.111 | 0.376 | 1.55E-22 | 9 |

|                 |          |            |       |       |          |   |
|-----------------|----------|------------|-------|-------|----------|---|
| <b>LMAN1</b>    | 8.11E-26 | -0.8873144 | 0.121 | 0.496 | 1.62E-22 | 9 |
| <b>IGLV1-47</b> | 1.11E-25 | -3.9472752 | 0.121 | 0.085 | 2.21E-22 | 9 |
| <b>ANXA6</b>    | 1.36E-25 | -0.3305605 | 0.121 | 0.291 | 2.73E-22 | 9 |
| <b>IGHV3-30</b> | 1.95E-25 | -1.2803405 | 0.939 | 0.06  | 3.91E-22 | 9 |
| <b>CD27</b>     | 2.57E-25 | -0.7144561 | 0.131 | 0.393 | 5.13E-22 | 9 |
| <b>TNFAIP2</b>  | 3.16E-25 | 0.3797071  | 0.869 | 0.017 | 6.31E-22 | 9 |
| <b>CALU1</b>    | 4.87E-25 | -0.3305188 | 0.131 | 0.282 | 9.74E-22 | 9 |
| <b>SPCS3</b>    | 7.67E-25 | -0.9826974 | 0.131 | 0.521 | 1.53E-21 | 9 |
| <b>SEL1L3</b>   | 1.27E-24 | -0.4082922 | 0.131 | 0.274 | 2.53E-21 | 9 |
| <b>HNRNPAB</b>  | 1.42E-24 | -0.6212327 | 0.141 | 0.274 | 2.85E-21 | 9 |
| <b>SNRPB</b>    | 1.46E-24 | -0.586357  | 0.141 | 0.299 | 2.92E-21 | 9 |
| <b>AREG4</b>    | 1.83E-24 | -0.2616479 | 0.949 | 0.077 | 3.67E-21 | 9 |
| <b>HIST1H4H</b> | 3.41E-24 | -0.3678583 | 0.939 | 0.085 | 6.82E-21 | 9 |
| <b>RPS27L1</b>  | 4.31E-24 | -0.50526   | 0.141 | 0.385 | 8.61E-21 | 9 |
| <b>PPIB</b>     | 7.24E-24 | -1.2894891 | 0.162 | 0.607 | 1.45E-20 | 9 |
| <b>IGKV2-24</b> | 7.88E-24 | -2.6800341 | 0.111 | 0.026 | 1.58E-20 | 9 |
| <b>THBS1</b>    | 8.40E-24 | 0.38572085 | 0.131 | 0.009 | 1.68E-20 | 9 |
| <b>ENO1</b>     | 1.05E-23 | -0.783744  | 0.152 | 0.333 | 2.10E-20 | 9 |
| <b>EIF2S2</b>   | 1.19E-23 | -0.3909396 | 0.141 | 0.359 | 2.37E-20 | 9 |
| <b>HMGA1</b>    | 1.19E-23 | -0.2895214 | 0.141 | 0.214 | 2.38E-20 | 9 |
| <b>SNRPF1</b>   | 1.25E-23 | -0.4062908 | 0.121 | 0.265 | 2.50E-20 | 9 |
| <b>CCL31</b>    | 2.33E-23 | -0.4377228 | 0.939 | 0.077 | 4.67E-20 | 9 |

|                  |          |            |       |       |          |   |
|------------------|----------|------------|-------|-------|----------|---|
| <b>FABP51</b>    | 2.78E-23 | -0.7056422 | 0.111 | 0.316 | 5.57E-20 | 9 |
| <b>NCF11</b>     | 2.93E-23 | -0.3469072 | 0.141 | 0.385 | 5.86E-20 | 9 |
| <b>HELLS</b>     | 3.34E-23 | -0.4379044 | 0.101 | 0.188 | 6.69E-20 | 9 |
| <b>MTDH</b>      | 3.69E-23 | -0.847812  | 0.152 | 0.479 | 7.39E-20 | 9 |
| <b>H2AFV1</b>    | 4.18E-23 | -0.430337  | 0.152 | 0.35  | 8.35E-20 | 9 |
| <b>ODC1</b>      | 4.33E-23 | -0.2772737 | 0.101 | 0.231 | 8.67E-20 | 9 |
| <b>ATP5F1A</b>   | 5.22E-23 | -0.5879314 | 0.152 | 0.35  | 1.04E-19 | 9 |
| <b>SRP91</b>     | 6.30E-23 | -0.2688641 | 0.152 | 0.256 | 1.26E-19 | 9 |
| <b>MRPL51</b>    | 1.41E-22 | -0.2643112 | 0.111 | 0.333 | 2.81E-19 | 9 |
| <b>HIST1H2AE</b> | 2.26E-22 | -0.441285  | 1     | 0.137 | 4.53E-19 | 9 |
| <b>HSPD12</b>    | 2.64E-22 | -0.8143033 | 0.172 | 0.376 | 5.27E-19 | 9 |
| <b>H2AFZ</b>     | 3.43E-22 | -0.8812882 | 0.172 | 0.376 | 6.85E-19 | 9 |
| <b>DERL1</b>     | 4.02E-22 | -0.46137   | 0.172 | 0.368 | 8.05E-19 | 9 |
| <b>HIST2H2AC</b> | 5.65E-22 | -0.3381527 | 0.162 | 0.162 | 1.13E-18 | 9 |
| <b>DUSP23</b>    | 1.07E-21 | 0.33309404 | 0.96  | 0.111 | 2.15E-18 | 9 |
| <b>IGHV6-1</b>   | 2.40E-21 | -1.5242477 | 0.96  | 0.111 | 4.80E-18 | 9 |
| <b>PRDX12</b>    | 3.01E-21 | -0.5503308 | 0.182 | 0.393 | 6.03E-18 | 9 |
| <b>HYOU1</b>     | 4.09E-21 | -0.2534948 | 0.111 | 0.274 | 8.17E-18 | 9 |
| <b>CENPW</b>     | 4.22E-21 | -0.2783233 | 0.99  | 0.145 | 8.43E-18 | 9 |
| <b>ACTG1</b>     | 9.49E-21 | -1.0778985 | 0.192 | 0.462 | 1.90E-17 | 9 |
| <b>TPI1</b>      | 1.20E-20 | -0.8294714 | 0.121 | 0.402 | 2.41E-17 | 9 |

|                   |          |            |       |       |          |   |
|-------------------|----------|------------|-------|-------|----------|---|
| <b>AL355075.4</b> | 2.14E-20 | -0.2975617 | 0.859 | 0.06  | 4.28E-17 | 9 |
| <b>HLA-DPA11</b>  | 4.60E-20 | -0.4773734 | 0.192 | 0.308 | 9.20E-17 | 9 |
| <b>AIF1</b>       | 7.69E-20 | 0.29430724 | 0.172 | 0.043 | 1.54E-16 | 9 |
| <b>IFITM23</b>    | 1.03E-19 | 0.39644683 | 0.172 | 0.094 | 2.05E-16 | 9 |
| <b>IGLV3-11</b>   | 1.41E-19 | -2.5788384 | 0.97  | 0.137 | 2.83E-16 | 9 |
| <b>SSR41</b>      | 2.32E-19 | -1.3133065 | 0.273 | 0.59  | 4.64E-16 | 9 |
| <b>IGHG2</b>      | 4.94E-19 | -1.8896493 | 0.919 | 0.128 | 9.88E-16 | 9 |
| <b>SLC2A6</b>     | 5.43E-19 | -0.2633224 | 0.869 | 0.06  | 1.09E-15 | 9 |
| <b>FAM30A1</b>    | 5.82E-19 | -0.3637615 | 0.939 | 0.145 | 1.16E-15 | 9 |
| <b>HSPA81</b>     | 2.91E-18 | -0.6259505 | 0.232 | 0.402 | 5.83E-15 | 9 |
| <b>PTTG1</b>      | 4.82E-18 | -0.4268688 | 0.111 | 0.222 | 9.63E-15 | 9 |
| <b>HIST1H2AH</b>  | 5.27E-18 | -0.2640751 | 0.889 | 0.111 | 1.05E-14 | 9 |
| <b>CHEK1</b>      | 5.37E-18 | -0.2543081 | 0.909 | 0.103 | 1.07E-14 | 9 |
| <b>HM13</b>       | 6.22E-18 | -0.5845019 | 0.242 | 0.47  | 1.24E-14 | 9 |
| <b>HIST1H2AC</b>  | 6.93E-18 | -0.3482049 | 0.869 | 0.077 | 1.39E-14 | 9 |
| <b>LYN</b>        | 7.06E-18 | -0.3188825 | 0.929 | 0.137 | 1.41E-14 | 9 |
| <b>ADA</b>        | 9.85E-18 | -0.2886064 | 0.97  | 0.162 | 1.97E-14 | 9 |
| <b>PLEK1</b>      | 1.20E-17 | -0.3486778 | 0.96  | 0.145 | 2.41E-14 | 9 |
| <b>CDC25B1</b>    | 1.32E-17 | -0.3155003 | 0.99  | 0.171 | 2.65E-14 | 9 |
| <b>MT2A5</b>      | 1.77E-17 | -0.6046156 | 1     | 0.179 | 3.54E-14 | 9 |
| <b>CD741</b>      | 5.19E-17 | -0.6353871 | 0.232 | 0.564 | 1.04E-13 | 9 |
| <b>DNMT11</b>     | 5.72E-17 | -0.3793333 | 0.96  | 0.154 | 1.14E-13 | 9 |

|                 |          |            |       |       |          |   |
|-----------------|----------|------------|-------|-------|----------|---|
| <b>MCM7</b>     | 6.81E-17 | -0.3093109 | 0.96  | 0.154 | 1.36E-13 | 9 |
| <b>S100A102</b> | 7.94E-17 | -0.4500068 | 0.242 | 0.376 | 1.59E-13 | 9 |
| <b>TUBA1B1</b>  | 8.25E-17 | -0.8454725 | 0.232 | 0.291 | 1.65E-13 | 9 |
| <b>SLC17A9</b>  | 3.93E-16 | -0.3813903 | 0.97  | 0.171 | 7.87E-13 | 9 |
| <b>SMC1A</b>    | 5.56E-16 | -0.2832156 | 0.98  | 0.179 | 1.11E-12 | 9 |
| <b>ADSL</b>     | 5.68E-16 | -0.2808575 | 0.96  | 0.162 | 1.14E-12 | 9 |
| <b>IGHA2</b>    | 6.87E-16 | -2.1464289 | 0.99  | 0.188 | 1.37E-12 | 9 |
| <b>CDKN2A</b>   | 7.83E-16 | -0.2801483 | 0.99  | 0.188 | 1.57E-12 | 9 |
| <b>COTL13</b>   | 1.88E-15 | -0.2751913 | 0.263 | 0.35  | 3.75E-12 | 9 |
| <b>SPI1</b>     | 2.05E-15 | -0.397456  | 0.889 | 0.111 | 4.11E-12 | 9 |
| <b>EEF1A1</b>   | 2.33E-15 | -1.0374629 | 0.323 | 0.598 | 4.67E-12 | 9 |
| <b>SOD2</b>     | 3.02E-15 | -0.2617267 | 1     | 0.205 | 6.03E-12 | 9 |
| <b>TMED10</b>   | 4.88E-15 | -0.7804075 | 0.283 | 0.453 | 9.76E-12 | 9 |
| <b>PTCH2</b>    | 8.17E-15 | -0.5217235 | 0.97  | 0.197 | 1.63E-11 | 9 |
| <b>SH2D2A</b>   | 1.27E-14 | 0.31213589 | 0.182 | 0     | 2.54E-11 | 9 |
| <b>IGKV4-1</b>  | 1.48E-14 | -1.150509  | 0.97  | 0.188 | 2.97E-11 | 9 |
| <b>CKAP2</b>    | 2.38E-14 | -0.2545001 | 0.99  | 0.205 | 4.76E-11 | 9 |
| <b>IGHG4</b>    | 2.82E-14 | -2.8133584 | 1     | 0.214 | 5.64E-11 | 9 |
| <b>MYDGF</b>    | 3.71E-14 | -0.989508  | 0.354 | 0.513 | 7.41E-11 | 9 |
| <b>TUBB</b>     | 4.01E-14 | -0.5194892 | 0.212 | 0.231 | 8.02E-11 | 9 |
| <b>IGHG3</b>    | 1.11E-13 | -2.0414883 | 0.99  | 0.214 | 2.23E-10 | 9 |



|                  |          |            |       |       |          |   |
|------------------|----------|------------|-------|-------|----------|---|
| <b>HIST1H1B</b>  | 1.45E-13 | -0.6299107 | 1     | 0.222 | 2.90E-10 | 9 |
| <b>VIM</b>       | 1.88E-13 | -0.455483  | 0.293 | 0.462 | 3.76E-10 | 9 |
| <b>SEMA4A</b>    | 3.76E-13 | -0.3054562 | 0.97  | 0.205 | 7.53E-10 | 9 |
| <b>ERLEC1</b>    | 9.08E-13 | -0.6732961 | 0.384 | 0.496 | 1.82E-09 | 9 |
| <b>MT-CO11</b>   | 9.44E-13 | 0.84990083 | 1     | 0.991 | 1.89E-09 | 9 |
| <b>IGHM</b>      | 1.13E-12 | -4.3044719 | 1     | 0.231 | 2.25E-09 | 9 |
| <b>CPNE5</b>     | 3.24E-12 | -0.409288  | 1     | 0.239 | 6.48E-09 | 9 |
| <b>MTRNR2L12</b> | 4.06E-12 | 0.97307593 | 1     | 0.949 | 8.11E-09 | 9 |
| <b>Z93241.11</b> | 4.33E-12 | -0.7222125 | 0.99  | 0.231 | 8.66E-09 | 9 |
| <b>CBWD1</b>     | 5.50E-12 | -0.3253615 | 1     | 0.239 | 1.10E-08 | 9 |
| <b>SLC38A5</b>   | 6.64E-12 | -0.3669197 | 0.949 | 0.205 | 1.33E-08 | 9 |
| <b>KLF101</b>    | 1.28E-11 | -0.3131881 | 1     | 0.248 | 2.57E-08 | 9 |
| <b>LSM4</b>      | 1.37E-11 | -0.305486  | 0.99  | 0.239 | 2.75E-08 | 9 |
| <b>SSRP1</b>     | 1.46E-11 | -0.2553712 | 0.909 | 0.171 | 2.91E-08 | 9 |
| <b>MT-CO31</b>   | 1.92E-11 | 0.77313021 | 1     | 1     | 3.83E-08 | 9 |
| <b>GPR35</b>     | 2.17E-11 | 0.29390609 | 0.354 | 0     | 4.35E-08 | 9 |
| <b>CD320</b>     | 4.84E-11 | -0.5348342 | 0.323 | 0.282 | 9.68E-08 | 9 |
| <b>RHOB1</b>     | 5.46E-11 | -0.3878738 | 0.929 | 0.222 | 1.09E-07 | 9 |
| <b>COMTD1</b>    | 5.93E-11 | -0.2931441 | 0.98  | 0.239 | 1.19E-07 | 9 |
| <b>HSH2D2</b>    | 8.06E-11 | -0.4895107 | 0.081 | 0.265 | 1.61E-07 | 9 |
| <b>NAAA</b>      | 1.06E-10 | 0.25980137 | 0.798 | 0.077 | 2.11E-07 | 9 |
| <b>PFN12</b>     | 1.07E-10 | -0.6432438 | 0.394 | 0.504 | 2.15E-07 | 9 |

|                    |          |            |       |       |          |   |
|--------------------|----------|------------|-------|-------|----------|---|
| <b>IGLC3</b>       | 1.28E-10 | -2.0333363 | 0.96  | 0.231 | 2.57E-07 | 9 |
| <b>LGALS11</b>     | 1.65E-10 | -0.962953  | 0.394 | 0.419 | 3.29E-07 | 9 |
| <b>MT-CO2</b>      | 1.77E-10 | 0.7363092  | 1     | 0.991 | 3.54E-07 | 9 |
| <b>UCHL5</b>       | 2.02E-10 | -0.269873  | 0.99  | 0.256 | 4.04E-07 | 9 |
| <b>FAM136A</b>     | 3.75E-10 | -0.4054947 | 1     | 0.265 | 7.49E-07 | 9 |
| <b>ISOC2</b>       | 4.68E-10 | -0.3457449 | 0.929 | 0.239 | 9.37E-07 | 9 |
| <b>MTHFD2</b>      | 4.70E-10 | -0.4695994 | 0.111 | 0.282 | 9.40E-07 | 9 |
| <b>MT-CYB1</b>     | 5.85E-10 | 0.67367859 | 1     | 0.957 | 1.17E-06 | 9 |
| <b>FTL</b>         | 6.27E-10 | -0.304806  | 0.354 | 0.547 | 1.25E-06 | 9 |
| <b>TUBA4A1</b>     | 6.51E-10 | -0.2697733 | 0.97  | 0.248 | 1.30E-06 | 9 |
| <b>NUCKS1</b>      | 7.73E-10 | -0.3543527 | 0.97  | 0.248 | 1.55E-06 | 9 |
| <b>FDPS</b>        | 1.21E-09 | -0.3206234 | 1     | 0.274 | 2.42E-06 | 9 |
| <b>STOML2</b>      | 1.32E-09 | -0.2964812 | 0.96  | 0.248 | 2.64E-06 | 9 |
| <b>LRRC59</b>      | 1.62E-09 | -0.424406  | 0.97  | 0.256 | 3.25E-06 | 9 |
| <b>SEC11C</b>      | 2.45E-09 | -0.9389347 | 0.121 | 0.521 | 4.90E-06 | 9 |
| <b>PRMT1</b>       | 2.88E-09 | -0.313223  | 0.949 | 0.239 | 5.76E-06 | 9 |
| <b>HNRNPR</b>      | 4.09E-09 | -0.3392273 | 1     | 0.282 | 8.18E-06 | 9 |
| <b>PSMA41</b>      | 5.08E-09 | -0.401895  | 1     | 0.282 | 1.02E-05 | 9 |
| <b>MT-ND4L2</b>    | 5.63E-09 | 0.58236598 | 1     | 0.966 | 1.13E-05 | 9 |
| <b>MT-ATP6</b>     | 6.25E-09 | 0.52199721 | 1     | 0.974 | 1.25E-05 | 9 |
| <b>AC245014.31</b> | 9.29E-09 | -0.6909409 | 0.99  | 0.282 | 1.86E-05 | 9 |

|                    |          |            |       |       |            |   |
|--------------------|----------|------------|-------|-------|------------|---|
| <b>TLN1</b>        | 1.01E-08 | 0.28708311 | 0.343 | 0.205 | 2.03E-05   | 9 |
| <b>PLPP51</b>      | 1.07E-08 | -0.5219161 | 0.121 | 0.359 | 2.15E-05   | 9 |
| <b>S100A86</b>     | 1.29E-08 | 0.52421969 | 0.303 | 0.103 | 2.58E-05   | 9 |
| <b>PARP1</b>       | 1.33E-08 | -0.4511627 | 0.98  | 0.274 | 2.66E-05   | 9 |
| <b>NUCB2</b>       | 1.36E-08 | -0.2912242 | 1     | 0.291 | 2.72E-05   | 9 |
| <b>SNRPE</b>       | 2.06E-08 | -0.4989883 | 0.121 | 0.308 | 4.13E-05   | 9 |
| <b>MDH1</b>        | 3.22E-08 | -0.3390821 | 0.98  | 0.282 | 6.43E-05   | 9 |
| <b>TCF4</b>        | 3.30E-08 | -0.3402248 | 0.98  | 0.282 | 6.60E-05   | 9 |
| <b>TMPO1</b>       | 3.39E-08 | -0.4929238 | 0.98  | 0.282 | 6.77E-05   | 9 |
| <b>XIST4</b>       | 3.64E-08 | -0.9864471 | 1     | 0.291 | 7.28E-05   | 9 |
| <b>CD38</b>        | 3.70E-08 | -0.8533388 | 0.141 | 0.487 | 7.40E-05   | 9 |
| <b>EIF4A31</b>     | 3.76E-08 | -0.5494371 | 0.97  | 0.274 | 7.53E-05   | 9 |
| <b>PPM1G</b>       | 3.80E-08 | -0.4629227 | 0.394 | 0.282 | 7.60E-05   | 9 |
| <b>IDH21</b>       | 4.69E-08 | -0.3374569 | 0.121 | 0.291 | 9.38E-05   | 9 |
| <b>CACYBP</b>      | 4.81E-08 | -0.6224804 | 0.99  | 0.291 | 9.62E-05   | 9 |
| <b>CCT6A</b>       | 4.88E-08 | -0.4039514 | 0.99  | 0.291 | 9.76E-05   | 9 |
| <b>OSTC</b>        | 5.72E-08 | -0.8181061 | 0.111 | 0.436 | 0.00011433 | 9 |
| <b>TNFRSF17</b>    | 9.23E-08 | -0.7845634 | 0.111 | 0.427 | 0.0001847  | 9 |
| <b>ANXA21</b>      | 1.03E-07 | 0.27063027 | 0.96  | 0.282 | 0.00020527 | 9 |
| <b>SLC9A3R1</b>    | 1.55E-07 | -0.3389629 | 0.131 | 0.222 | 0.0003105  | 9 |
| <b>MIR4435-2HC</b> | 1.64E-07 | -0.3143404 | 0.99  | 0.299 | 0.0003277  | 9 |
| <b>ATP5F1B</b>     | 1.84E-07 | -0.4634309 | 0.444 | 0.376 | 0.00036862 | 9 |

|                 |          |            |       |       |            |   |
|-----------------|----------|------------|-------|-------|------------|---|
| <b>CCT3</b>     | 3.15E-07 | -0.4604766 | 0.111 | 0.299 | 0.0006298  | 9 |
| <b>CDK2AP2</b>  | 3.32E-07 | -0.3585834 | 0.919 | 0.265 | 0.00066405 | 9 |
| <b>YIF1B</b>    | 3.45E-07 | -0.3652237 | 0.97  | 0.299 | 0.00069098 | 9 |
| <b>ANKRD28</b>  | 3.63E-07 | -0.4728037 | 0.444 | 0.35  | 0.0007266  | 9 |
| <b>LYZ</b>      | 3.87E-07 | 0.75654781 | 0.707 | 0.034 | 0.00077475 | 9 |
| <b>TOR3A</b>    | 4.78E-07 | -0.4470533 | 0.919 | 0.274 | 0.00095516 | 9 |
| <b>XRCC51</b>   | 5.00E-07 | -0.3165916 | 0.98  | 0.308 | 0.00100085 | 9 |
| <b>S100A62</b>  | 5.72E-07 | -0.3116043 | 0.99  | 0.333 | 0.00114416 | 9 |
| <b>MLEC</b>     | 6.21E-07 | -0.305787  | 0.97  | 0.299 | 0.00124197 | 9 |
| <b>YWHAQ1</b>   | 6.47E-07 | -0.4354146 | 1     | 0.316 | 0.00129456 | 9 |
| <b>CTSB</b>     | 8.10E-07 | 0.25200505 | 0.758 | 0.103 | 0.00162064 | 9 |
| <b>TPD52</b>    | 8.20E-07 | -0.4112541 | 0.97  | 0.299 | 0.00163923 | 9 |
| <b>PDE4B</b>    | 8.75E-07 | -0.4155429 | 0.96  | 0.291 | 0.00174926 | 9 |
| <b>CCND21</b>   | 1.24E-06 | -0.5434871 | 1     | 0.325 | 0.00248925 | 9 |
| <b>DECR1</b>    | 1.26E-06 | -0.4039068 | 0.97  | 0.299 | 0.00252918 | 9 |
| <b>LMAN2</b>    | 1.57E-06 | -0.6410787 | 0.131 | 0.419 | 0.00313621 | 9 |
| <b>PSMB21</b>   | 1.63E-06 | -0.4082177 | 1     | 0.325 | 0.00325956 | 9 |
| <b>EAF2</b>     | 1.69E-06 | -0.3907302 | 0.97  | 0.316 | 0.00337832 | 9 |
| <b>SNRPD3</b>   | 1.82E-06 | -0.4898126 | 1     | 0.325 | 0.00364409 | 9 |
| <b>S100A43</b>  | 1.86E-06 | -0.3629322 | 1     | 0.35  | 0.00372577 | 9 |
| <b>GADD45B2</b> | 2.40E-06 | -0.3827233 | 1     | 0.333 | 0.00480711 | 9 |

|                    |          |            |       |       |            |   |
|--------------------|----------|------------|-------|-------|------------|---|
| <b>KDELR2</b>      | 2.78E-06 | -0.6429229 | 0.111 | 0.385 | 0.0055564  | 9 |
| <b>PSMA5</b>       | 2.94E-06 | -0.4940005 | 0.111 | 0.359 | 0.00587051 | 9 |
| <b>TXNDC5</b>      | 3.06E-06 | -0.6186937 | 0.101 | 0.368 | 0.0061174  | 9 |
| <b>IGLL5</b>       | 3.98E-06 | -0.9277609 | 0.111 | 0.368 | 0.00796711 | 9 |
| <b>CD79B1</b>      | 4.17E-06 | -0.4328389 | 0.96  | 0.316 | 0.00833021 | 9 |
| <b>MAP3K82</b>     | 4.28E-06 | -0.5284518 | 1     | 0.333 | 0.00855125 | 9 |
| <b>ERH1</b>        | 4.64E-06 | -0.6255066 | 0.162 | 0.376 | 0.00928476 | 9 |
| <b>PDCD51</b>      | 5.07E-06 | -0.5538399 | 1     | 0.333 | 0.01014819 | 9 |
| <b>FCRL5</b>       | 5.24E-06 | -0.6681665 | 1     | 0.333 | 0.01047783 | 9 |
| <b>ATF3</b>        | 6.38E-06 | -0.3178388 | 0.111 | 0.094 | 0.01275388 | 9 |
| <b>CD79A</b>       | 6.82E-06 | -0.8387733 | 0.101 | 0.342 | 0.0136411  | 9 |
| <b>CRELD2</b>      | 7.07E-06 | -0.5165705 | 0.111 | 0.368 | 0.01414172 | 9 |
| <b>VDAC12</b>      | 7.35E-06 | -0.5890851 | 1     | 0.333 | 0.01469541 | 9 |
| <b>CTSH</b>        | 7.59E-06 | -0.4357339 | 0.091 | 0.333 | 0.01517539 | 9 |
| <b>RAN1</b>        | 8.58E-06 | -0.6735402 | 1     | 0.342 | 0.017167   | 9 |
| <b>SRPRB</b>       | 9.66E-06 | -0.2634597 | 0.081 | 0.291 | 0.01932992 | 9 |
| <b>ALG51</b>       | 1.18E-05 | -0.4298781 | 0.111 | 0.342 | 0.02366861 | 9 |
| <b>ITGB7</b>       | 1.43E-05 | -0.3891957 | 0.939 | 0.299 | 0.02854968 | 9 |
| <b>CDK6</b>        | 1.69E-05 | -0.2845784 | 0.091 | 0.162 | 0.0337115  | 9 |
| <b>AC103591.34</b> | 1.80E-05 | -0.7701895 | 0.97  | 0.325 | 0.0360127  | 9 |
| <b>C1QBP1</b>      | 2.36E-05 | -0.6608336 | 0.141 | 0.342 | 0.0472039  | 9 |
| <b>HMGB22</b>      | 2.43E-05 | -0.9862981 | 0.97  | 0.325 | 0.04863042 | 9 |

|                  |            |            |       |       |            |   |
|------------------|------------|------------|-------|-------|------------|---|
| <b>ABRACL1</b>   | 2.59E-05   | -0.3062599 | 0.101 | 0.222 | 0.05179796 | 9 |
| <b>NDUFB6</b>    | 2.78E-05   | -0.5998884 | 0.111 | 0.342 | 0.05553386 | 9 |
| <b>PPP1CA</b>    | 2.92E-05   | -0.4470778 | 0.99  | 0.342 | 0.05842885 | 9 |
| <b>PSMB8</b>     | 3.31E-05   | -0.5037889 | 1     | 0.35  | 0.06617019 | 9 |
| <b>SRM</b>       | 3.57E-05   | -0.6863604 | 0.111 | 0.333 | 0.07145054 | 9 |
| <b>PRDX4</b>     | 3.77E-05   | -0.587491  | 0.182 | 0.427 | 0.07532509 | 9 |
| <b>PGAM1</b>     | 4.45E-05   | -0.4083487 | 0.96  | 0.342 | 0.08897975 | 9 |
| <b>RNASE6</b>    | 4.63E-05   | -0.4793265 | 0.111 | 0.333 | 0.09256349 | 9 |
| <b>MT-ND62</b>   | 6.06E-05   | 0.42452703 | 0.869 | 0.744 | 0.12119911 | 9 |
| <b>IGLV2-141</b> | 6.81E-05   | -2.7676057 | 0.02  | 0.12  | 0.1362293  | 9 |
| <b>HMGN2</b>     | 7.41E-05   | -0.693906  | 0.97  | 0.342 | 0.14828135 | 9 |
| <b>GZMA3</b>     | 7.76E-05   | 0.31714195 | 0.333 | 0     | 0.15527027 | 9 |
| <b>TMED9</b>     | 8.93E-05   | -0.622094  | 0.141 | 0.359 | 0.17855656 | 9 |
| <b>S100A9</b>    | 0.00010479 | 1.07120168 | 0.374 | 0.085 | 0.2095757  | 9 |
| <b>PSMD8</b>     | 0.00011213 | -0.457514  | 0.333 | 0.333 | 0.22425978 | 9 |
| <b>CISD2</b>     | 0.00012164 | -0.3707113 | 0.081 | 0.265 | 0.24328716 | 9 |
| <b>MRPS34</b>    | 0.0001256  | -0.6012301 | 1     | 0.359 | 0.25119573 | 9 |
| <b>PPA11</b>     | 0.00013441 | -0.5938299 | 0.98  | 0.35  | 0.26882853 | 9 |
| <b>JPT11</b>     | 0.00027282 | -0.8099088 | 1     | 0.368 | 0.54564149 | 9 |
| <b>CCDC50</b>    | 0.00030244 | -0.3899451 | 0.081 | 0.239 | 0.60487316 | 9 |
| <b>MANF</b>      | 0.00030353 | -0.6647253 | 1     | 0.376 | 0.60705789 | 9 |

|                  |            |            |       |       |            |   |
|------------------|------------|------------|-------|-------|------------|---|
| <b>CKAP4</b>     | 0.00031197 | -0.3190364 | 0.111 | 0.256 | 0.62394078 | 9 |
| <b>SLIRP</b>     | 0.00031576 | -0.3139901 | 0.121 | 0.274 | 0.6315209  | 9 |
| <b>SSR1</b>      | 0.00035405 | -0.7171501 | 1     | 0.376 | 0.70810373 | 9 |
| <b>PSMB91</b>    | 0.0004716  | -0.4889073 | 1     | 0.376 | 0.9431922  | 9 |
| <b>FBL</b>       | 0.00052446 | -0.3852516 | 0.131 | 0.299 | 1          | 9 |
| <b>LDHA1</b>     | 0.00054887 | -0.468074  | 1     | 0.385 | 1          | 9 |
| <b>DNAJB11</b>   | 0.00061588 | -0.4947687 | 1     | 0.385 | 1          | 9 |
| <b>HIST1H1D3</b> | 0.00064241 | -1.2669519 | 0.97  | 0.359 | 1          | 9 |
| <b>PIM2</b>      | 0.0006547  | -0.5327786 | 0.98  | 0.368 | 1          | 9 |
| <b>ANP32E</b>    | 0.00069234 | -0.5006892 | 0.111 | 0.274 | 1          | 9 |
| <b>CCDC167</b>   | 0.0007042  | -0.4497386 | 0.111 | 0.282 | 1          | 9 |
| <b>STT3A</b>     | 0.00076545 | -0.402168  | 0.121 | 0.291 | 1          | 9 |
| <b>IGHG1</b>     | 0.00084479 | -2.3710382 | 1     | 0.385 | 1          | 9 |
| <b>ADI1</b>      | 0.00090025 | -0.2916205 | 0.091 | 0.239 | 1          | 9 |
| <b>ZBP11</b>     | 0.00090058 | -0.9635653 | 1     | 0.385 | 1          | 9 |
| <b>COPZ1</b>     | 0.00100122 | -0.3579088 | 0.111 | 0.274 | 1          | 9 |
| <b>TUFM1</b>     | 0.00106369 | -0.5557505 | 0.99  | 0.385 | 1          | 9 |
| <b>SLC25A5</b>   | 0.00113063 | -0.90329   | 0.273 | 0.402 | 1          | 9 |
| <b>CHPF</b>      | 0.00113629 | -0.3819411 | 0.111 | 0.282 | 1          | 9 |
| <b>WDR741</b>    | 0.00113811 | -0.583136  | 0.818 | 0.248 | 1          | 9 |
| <b>RANBP11</b>   | 0.00113909 | -0.406883  | 0.121 | 0.282 | 1          | 9 |
| <b>GGH</b>       | 0.00116909 | -0.3119352 | 0.111 | 0.274 | 1          | 9 |

|                   |            |            |       |       |   |   |
|-------------------|------------|------------|-------|-------|---|---|
| <b>GNG7</b>       | 0.00122767 | -0.3703843 | 0.111 | 0.265 | 1 | 9 |
| <b>C12orf75</b>   | 0.00125975 | -0.4361564 | 0.101 | 0.248 | 1 | 9 |
| <b>SSR3</b>       | 0.0012803  | -0.8628638 | 0.394 | 0.479 | 1 | 9 |
| <b>EZH2</b>       | 0.0012882  | -0.3124614 | 0.525 | 0.171 | 1 | 9 |
| <b>CYTOR1</b>     | 0.00129335 | -0.5184554 | 0.99  | 0.385 | 1 | 9 |
| <b>IFNG-AS11</b>  | 0.00141869 | -0.3524095 | 0.061 | 0.128 | 1 | 9 |
| <b>UQCC2</b>      | 0.00172114 | -0.2899953 | 0.131 | 0.282 | 1 | 9 |
| <b>LSM5</b>       | 0.00178456 | -0.5147475 | 0.182 | 0.325 | 1 | 9 |
| <b>ANXA5</b>      | 0.00191137 | -0.5278774 | 1     | 0.393 | 1 | 9 |
| <b>AQP3</b>       | 0.00198596 | -0.6326021 | 0.919 | 0.368 | 1 | 9 |
| <b>UBA51</b>      | 0.00201325 | -0.301757  | 0.121 | 0.274 | 1 | 9 |
| <b>MYBL2</b>      | 0.00227671 | -0.3253982 | 0.081 | 0.205 | 1 | 9 |
| <b>IGLV1-511</b>  | 0.00300298 | -2.6869771 | 0.313 | 0.077 | 1 | 9 |
| <b>AC007569.1</b> | 0.00307095 | -0.445529  | 0.111 | 0.248 | 1 | 9 |
| <b>ABCB9</b>      | 0.00308656 | -0.3275989 | 0.091 | 0.214 | 1 | 9 |
| <b>ETFA</b>       | 0.00309162 | -0.2769018 | 0.152 | 0.291 | 1 | 9 |
| <b>CCT7</b>       | 0.00339146 | -0.3064526 | 0.121 | 0.265 | 1 | 9 |
| <b>NDUFAB1</b>    | 0.00356206 | -0.5567275 | 1     | 0.402 | 1 | 9 |
| <b>MESD</b>       | 0.00379717 | -0.5781423 | 1     | 0.402 | 1 | 9 |
| <b>GMPPB</b>      | 0.00391715 | -0.3271014 | 0.111 | 0.239 | 1 | 9 |
| <b>IGLV6-571</b>  | 0.00399014 | -1.107723  | 0.364 | 0.145 | 1 | 9 |



|                   |            |            |       |       |   |   |
|-------------------|------------|------------|-------|-------|---|---|
| <b>CCT5</b>       | 0.004353   | -0.2943125 | 0.101 | 0.231 | 1 | 9 |
| <b>JCHAIN</b>     | 0.00450031 | -1.3180961 | 1     | 0.658 | 1 | 9 |
| <b>PA2G41</b>     | 0.00472445 | -0.7480766 | 0.566 | 0.325 | 1 | 9 |
| <b>CCT81</b>      | 0.00523212 | -0.5482899 | 0.879 | 0.368 | 1 | 9 |
| <b>NME1</b>       | 0.00580413 | -0.3369928 | 0.091 | 0.205 | 1 | 9 |
| <b>IGHV4-4</b>    | 0.00696226 | -2.0861234 | 0.141 | 0.026 | 1 | 9 |
| <b>SLC25A4</b>    | 0.00795852 | -0.286086  | 0.111 | 0.231 | 1 | 9 |
| <b>PPBP3</b>      | 0.00841894 | 0.29929251 | 0.212 | 0.06  | 1 | 9 |
| <b>CISD1</b>      | 0.00842355 | -0.344729  | 0.131 | 0.248 | 1 | 9 |
| <b>IGLVI-70</b>   | 0.00886359 | -0.5099871 | 0.101 | 0.017 | 1 | 9 |
| <b>LINC014801</b> | 0.0089407  | -0.5342273 | 0.111 | 0.231 | 1 | 9 |
| <b>AL133467.1</b> | 0.00902724 | -0.3292482 | 0.111 | 0.231 | 1 | 9 |
| <b>BIK</b>        | 0.01027684 | -0.4134852 | 0.111 | 0.222 | 1 | 9 |
| <b>POU2AF1</b>    | 0.01042562 | -0.5541131 | 0.99  | 0.41  | 1 | 9 |
| <b>RPA3</b>       | 0.010721   | -0.472112  | 0.172 | 0.282 | 1 | 9 |
| <b>EPRS</b>       | 0.01165286 | -0.451662  | 0.859 | 0.35  | 1 | 9 |
| <b>IGLC2</b>      | 0.01184923 | -3.0263463 | 0.99  | 0.402 | 1 | 9 |
| <b>TENT5C1</b>    | 0.01232469 | -0.6146131 | 0.939 | 0.385 | 1 | 9 |
| <b>IGHV4-31</b>   | 0.0143894  | -1.8043385 | 0.111 | 0.026 | 1 | 9 |
| <b>MZB1</b>       | 0.0149205  | -1.415292  | 1     | 0.641 | 1 | 9 |
| <b>HIST1H4C2</b>  | 0.01724499 | -1.5669843 | 0.99  | 0.41  | 1 | 9 |
| <b>HLA-DRB11</b>  | 0.0174398  | -0.2914814 | 0.596 | 0.359 | 1 | 9 |

|                  |            |            |       |       |   |   |
|------------------|------------|------------|-------|-------|---|---|
| <b>BOLA3</b>     | 0.019132   | -0.2949101 | 0.111 | 0.214 | 1 | 9 |
| <b>MX12</b>      | 0.01947997 | -0.2991174 | 0.111 | 0.197 | 1 | 9 |
| <b>HSP90B1</b>   | 0.01951132 | -1.4210245 | 1     | 0.641 | 1 | 9 |
| <b>TXN1</b>      | 0.02105069 | -0.8698887 | 1     | 0.427 | 1 | 9 |
| <b>ENTPD1</b>    | 0.02162662 | -0.3082493 | 0.141 | 0.222 | 1 | 9 |
| <b>VBP1</b>      | 0.02163753 | -0.2759591 | 0.101 | 0.188 | 1 | 9 |
| <b>IFI62</b>     | 0.02309894 | -0.3326277 | 0.141 | 0.222 | 1 | 9 |
| <b>PRDX3</b>     | 0.02320692 | -0.4402978 | 0.152 | 0.248 | 1 | 9 |
| <b>ZFP36L21</b>  | 0.02360738 | -0.3281463 | 0.889 | 0.359 | 1 | 9 |
| <b>HSPB11</b>    | 0.02442831 | -0.3056549 | 0.141 | 0.205 | 1 | 9 |
| <b>IGKC1</b>     | 0.02452833 | -1.8077876 | 0.98  | 0.419 | 1 | 9 |
| <b>LDHB</b>      | 0.02524377 | -0.6864856 | 0.98  | 0.419 | 1 | 9 |
| <b>IGHV3-491</b> | 0.02563883 | -2.1131153 | 0.101 | 0.026 | 1 | 9 |
| <b>ATP5MC31</b>  | 0.02965133 | -0.7946385 | 1     | 0.436 | 1 | 9 |
| <b>MRPL3</b>     | 0.02998673 | -0.268139  | 0.121 | 0.214 | 1 | 9 |
| <b>IGLV1-44</b>  | 0.03424788 | -3.8817387 | 0.111 | 0.034 | 1 | 9 |
| <b>ATP5MC1</b>   | 0.04096109 | -0.6765414 | 1     | 0.436 | 1 | 9 |
| <b>HMGB3</b>     | 0.04097839 | -0.3232154 | 0.101 | 0.179 | 1 | 9 |
| <b>TMEM106C</b>  | 0.04820506 | -0.3113654 | 0.111 | 0.188 | 1 | 9 |
| <b>GSTP11</b>    | 0.04910626 | -0.8509528 | 0.97  | 0.427 | 1 | 9 |
| <b>HSPA52</b>    | 0.05294645 | -1.2443054 | 1     | 0.624 | 1 | 9 |

|                  |            |            |       |       |   |   |
|------------------|------------|------------|-------|-------|---|---|
| <b>PSAP</b>      | 0.05604852 | -0.4722358 | 1     | 0.453 | 1 | 9 |
| <b>CORO1A1</b>   | 0.05627203 | -0.370869  | 0.889 | 0.393 | 1 | 9 |
| <b>BRCA1</b>     | 0.05785477 | -0.2675262 | 0.263 | 0.128 | 1 | 9 |
| <b>CDKN1A</b>    | 0.05945543 | -0.2719256 | 0.263 | 0.188 | 1 | 9 |
| <b>IGKV3-201</b> | 0.07658367 | -4.5663441 | 0.111 | 0.043 | 1 | 9 |
| <b>NT5C3A</b>    | 0.07724244 | -0.2703882 | 0.283 | 0.145 | 1 | 9 |
| <b>STMN11</b>    | 0.08538464 | -0.502574  | 0.141 | 0.205 | 1 | 9 |
| <b>RRBP1</b>     | 0.09703905 | -1.0588392 | 0.96  | 0.581 | 1 | 9 |
| <b>SNRPG1</b>    | 0.10071662 | -0.6063611 | 0.859 | 0.376 | 1 | 9 |
| <b>HIST1H1C</b>  | 0.10251137 | -1.0461507 | 0.929 | 0.41  | 1 | 9 |
| <b>TYMS</b>      | 0.10344072 | -0.2942594 | 0.081 | 0.12  | 1 | 9 |
| <b>HNRNPA2B1</b> | 0.10374708 | -1.0215823 | 1     | 0.607 | 1 | 9 |
| <b>PRDM12</b>    | 0.10944293 | -0.6655687 | 0.99  | 0.453 | 1 | 9 |
| <b>DCTPP1</b>    | 0.11318784 | -0.306574  | 0.111 | 0.171 | 1 | 9 |
| <b>ZFP361</b>    | 0.11692649 | -0.7929466 | 1     | 0.47  | 1 | 9 |
| <b>RPN2</b>      | 0.11713748 | -0.6124282 | 1     | 0.479 | 1 | 9 |
| <b>SUB1</b>      | 0.12418748 | -1.2333969 | 1     | 0.598 | 1 | 9 |
| <b>IGKV3-111</b> | 0.12481098 | -3.8692714 | 0.111 | 0.051 | 1 | 9 |
| <b>IGHV3-64</b>  | 0.14300378 | -0.3564697 | 0.111 | 0.051 | 1 | 9 |
| <b>IGHV3-7</b>   | 0.14300378 | -1.9192223 | 0.111 | 0.051 | 1 | 9 |
| <b>DDOST</b>     | 0.14729777 | -0.5145741 | 0.424 | 0.402 | 1 | 9 |
| <b>TAGLN21</b>   | 0.14897517 | -0.7413977 | 0.949 | 0.436 | 1 | 9 |

|                 |            |            |       |       |   |   |
|-----------------|------------|------------|-------|-------|---|---|
| <b>ELL2</b>     | 0.15163765 | -0.8386873 | 1     | 0.462 | 1 | 9 |
| <b>CAV1</b>     | 0.15368374 | -0.2777391 | 0.091 | 0.128 | 1 | 9 |
| <b>NDUFB3</b>   | 0.16527044 | -0.3807758 | 0.384 | 0.35  | 1 | 9 |
| <b>ACTB1</b>    | 0.16758165 | -0.5863406 | 0.949 | 0.684 | 1 | 9 |
| <b>PSME2</b>    | 0.16831613 | -0.896928  | 1     | 0.47  | 1 | 9 |
| <b>MEF2C1</b>   | 0.20644547 | -0.839299  | 0.99  | 0.47  | 1 | 9 |
| <b>JUN</b>      | 0.20644547 | -1.435798  | 0.98  | 0.462 | 1 | 9 |
| <b>CENPU</b>    | 0.21028893 | -0.3511415 | 0.343 | 0.171 | 1 | 9 |
| <b>RPN11</b>    | 0.24120328 | -0.9693639 | 1     | 0.47  | 1 | 9 |
| <b>DERL3</b>    | 0.24414883 | -0.8189151 | 1     | 0.479 | 1 | 9 |
| <b>HSP90AB1</b> | 0.26875704 | -1.0747828 | 1     | 0.573 | 1 | 9 |
| <b>PDIA6</b>    | 0.30855879 | -0.953821  | 1     | 0.487 | 1 | 9 |
| <b>PPIA1</b>    | 0.31383538 | -0.9059551 | 0.99  | 0.487 | 1 | 9 |
| <b>COBLL1</b>   | 0.3256574  | -0.4772664 | 0.354 | 0.316 | 1 | 9 |
| <b>RPLP0</b>    | 0.33258952 | -0.9932215 | 1     | 0.59  | 1 | 9 |
| <b>IGHV3-33</b> | 0.35724087 | -3.4233405 | 0.111 | 0.068 | 1 | 9 |
| <b>SELENOS</b>  | 0.36281184 | -0.7456086 | 1     | 0.487 | 1 | 9 |
| <b>HMGB13</b>   | 0.36303874 | -0.6795949 | 0.97  | 0.59  | 1 | 9 |
| <b>TMEM208</b>  | 0.37229288 | -0.4581888 | 0.404 | 0.342 | 1 | 9 |
| <b>ITM2C</b>    | 0.42061494 | -0.8245716 | 1     | 0.504 | 1 | 9 |
| <b>HDLBP</b>    | 0.42257147 | -0.7182198 | 0.808 | 0.462 | 1 | 9 |

|                   |            |            |       |       |   |   |
|-------------------|------------|------------|-------|-------|---|---|
| <b>MZT1</b>       | 0.43430534 | -0.3163332 | 0.141 | 0.137 | 1 | 9 |
| <b>CANX1</b>      | 0.45264409 | -0.4564405 | 0.899 | 0.444 | 1 | 9 |
| <b>HIST1H3B</b>   | 0.47473679 | -0.3153834 | 0.081 | 0.103 | 1 | 9 |
| <b>CALR</b>       | 0.4816159  | -0.8734727 | 0.869 | 0.419 | 1 | 9 |
| <b>XBP1</b>       | 0.50214421 | -0.855889  | 1     | 0.556 | 1 | 9 |
| <b>PRDX2</b>      | 0.50456381 | -0.7685827 | 0.515 | 0.385 | 1 | 9 |
| <b>PDIA4</b>      | 0.51939137 | -0.7877606 | 1     | 0.504 | 1 | 9 |
| <b>IGHV4-391</b>  | 0.52016136 | -3.1111853 | 0.111 | 0.077 | 1 | 9 |
| <b>MRPL37</b>     | 0.52038977 | -0.3352406 | 0.242 | 0.231 | 1 | 9 |
| <b>DYNLL1</b>     | 0.54305824 | -0.5255634 | 0.414 | 0.333 | 1 | 9 |
| <b>NCL1</b>       | 0.56917664 | -1.0940549 | 1     | 0.504 | 1 | 9 |
| <b>NPM1</b>       | 0.57498158 | -1.0247321 | 1     | 0.496 | 1 | 9 |
| <b>UBE2J1</b>     | 0.59831679 | -0.4541937 | 0.98  | 0.521 | 1 | 9 |
| <b>RPL22L11</b>   | 0.60102363 | -0.9758808 | 1     | 0.504 | 1 | 9 |
| <b>AC007952.4</b> | 0.60729339 | -0.8670747 | 0.758 | 0.393 | 1 | 9 |
| <b>HIST1H2AJ</b>  | 0.62295563 | -0.2846638 | 0.111 | 0.12  | 1 | 9 |
| <b>IGLV2-111</b>  | 0.62432032 | -3.7337892 | 0.101 | 0.103 | 1 | 9 |
| <b>IGHA1</b>      | 0.66540383 | -2.6144627 | 0.99  | 0.504 | 1 | 9 |
| <b>TPM4</b>       | 0.73517288 | -0.4444188 | 0.475 | 0.316 | 1 | 9 |
| <b>FKBP11</b>     | 0.7375871  | -0.8998795 | 1     | 0.521 | 1 | 9 |
| <b>TMEM14C1</b>   | 0.75126637 | -0.3053482 | 0.253 | 0.222 | 1 | 9 |
| <b>FKBP2</b>      | 0.75981586 | -0.8817477 | 0.939 | 0.496 | 1 | 9 |

|                  |            |            |       |       |          |    |
|------------------|------------|------------|-------|-------|----------|----|
| <b>SHMT2</b>     | 0.81128686 | -0.3453338 | 0.354 | 0.282 | 1        | 9  |
| <b>ASPM</b>      | 0.82227797 | -0.3042192 | 0.131 | 0.128 | 1        | 9  |
| <b>HIST1H1E1</b> | 0.82748399 | -1.0123014 | 1     | 0.547 | 1        | 9  |
| <b>GAS6</b>      | 0.83889314 | -0.2911648 | 0.354 | 0.282 | 1        | 9  |
| <b>GAPDH1</b>    | 0.84467554 | -1.0338622 | 1     | 0.547 | 1        | 9  |
| <b>MIF1</b>      | 0.84792061 | -1.2078178 | 1     | 0.521 | 1        | 9  |
| <b>P4HB</b>      | 0.87048649 | -0.7747141 | 0.97  | 0.53  | 1        | 9  |
| <b>SPCS2</b>     | 0.87719036 | -0.9953429 | 0.97  | 0.496 | 1        | 9  |
| <b>SDF2L1</b>    | 0.89129538 | -0.9247711 | 0.97  | 0.521 | 1        | 9  |
| <b>IGLV1-401</b> | 0.9371058  | -4.2499683 | 0.283 | 0.034 | 1        | 9  |
| <b>BUB1</b>      | 1.62E-35   | -0.2797915 | 0.991 | 0.029 | 3.25E-32 | 10 |
| <b>HERC5</b>     | 1.59E-34   | -0.3408593 | 1     | 0.039 | 3.19E-31 | 10 |
| <b>SNRPG2</b>    | 1.36E-32   | -0.318804  | 0.991 | 0.049 | 2.72E-29 | 10 |
| <b>SEL1L31</b>   | 5.46E-32   | -0.2529856 | 0.927 | 0.029 | 1.09E-28 | 10 |
| <b>PSMA51</b>    | 1.28E-31   | -0.3037761 | 1     | 0.058 | 2.56E-28 | 10 |
| <b>PRDX41</b>    | 1.28E-31   | -0.3432647 | 1     | 0.058 | 2.56E-28 | 10 |
| <b>HIST1H1D4</b> | 1.28E-31   | -0.4835561 | 1     | 0.058 | 2.56E-28 | 10 |
| <b>CENPU1</b>    | 2.55E-30   | -0.3670706 | 1     | 0.068 | 5.11E-27 | 10 |
| <b>PSMB5</b>     | 3.00E-30   | -0.3065241 | 1     | 0.068 | 6.00E-27 | 10 |
| <b>GNAI1</b>     | 2.99E-29   | -0.2579841 | 0.927 | 0.049 | 5.99E-26 | 10 |
| <b>HIST1H3B1</b> | 3.48E-29   | -0.2947934 | 0.991 | 0.068 | 6.95E-26 | 10 |

|                   |          |            |       |       |          |    |
|-------------------|----------|------------|-------|-------|----------|----|
| <b>FKBP3</b>      | 7.15E-29 | -0.3730331 | 1     | 0.078 | 1.43E-25 | 10 |
| <b>CAMK1</b>      | 8.53E-29 | -0.2983522 | 0.945 | 0.058 | 1.71E-25 | 10 |
| <b>RGCC1</b>      | 6.99E-28 | -0.2715001 | 0.9   | 0.049 | 1.40E-24 | 10 |
| <b>MRPS341</b>    | 7.20E-28 | -0.3532805 | 0.991 | 0.078 | 1.44E-24 | 10 |
| <b>ABRACL2</b>    | 1.18E-27 | -0.2822631 | 1     | 0.087 | 2.35E-24 | 10 |
| <b>HIST1H1E2</b>  | 1.55E-26 | -0.6925493 | 0.991 | 0.087 | 3.11E-23 | 10 |
| <b>FAM210B</b>    | 2.19E-26 | -0.6237103 | 1     | 0.097 | 4.38E-23 | 10 |
| <b>CKLF1</b>      | 4.40E-26 | -0.4869551 | 0.864 | 0.049 | 8.80E-23 | 10 |
| <b>ADH5</b>       | 5.23E-26 | -0.2978122 | 0.809 | 0.029 | 1.05E-22 | 10 |
| <b>AP005329.3</b> | 9.31E-26 | -0.5965182 | 0.973 | 0.078 | 1.86E-22 | 10 |
| <b>SPCS31</b>     | 4.90E-25 | -0.4156374 | 1     | 0.107 | 9.79E-22 | 10 |
| <b>SOX41</b>      | 2.15E-24 | -0.331246  | 0.827 | 0.049 | 4.31E-21 | 10 |
| <b>HPGD</b>       | 4.25E-24 | -0.3226998 | 1     | 0.117 | 8.49E-21 | 10 |
| <b>CITED21</b>    | 1.11E-23 | -0.2540738 | 0.8   | 0.039 | 2.23E-20 | 10 |
| <b>LINC02284</b>  | 3.32E-23 | -0.3057828 | 0.918 | 0.049 | 6.64E-20 | 10 |
| <b>LGMN</b>       | 3.49E-23 | 0.32317015 | 0.118 | 0.058 | 6.99E-20 | 10 |
| <b>HBA21</b>      | 4.80E-23 | -1.5607626 | 0.718 | 0.019 | 9.60E-20 | 10 |
| <b>SCYGR4</b>     | 5.95E-23 | -0.4354991 | 1     | 0.126 | 1.19E-19 | 10 |
| <b>HLTF</b>       | 6.08E-23 | -0.3342621 | 1     | 0.126 | 1.22E-19 | 10 |
| <b>FKBP21</b>     | 3.36E-22 | -0.3879057 | 0.882 | 0.078 | 6.72E-19 | 10 |
| <b>H1FX6</b>      | 1.01E-21 | -0.5960441 | 1     | 0.136 | 2.02E-18 | 10 |
| <b>TESC</b>       | 1.33E-21 | -0.3783958 | 0.791 | 0.058 | 2.66E-18 | 10 |

|                   |          |            |       |       |          |    |
|-------------------|----------|------------|-------|-------|----------|----|
| <b>CKS2</b>       | 3.63E-21 | -0.2784754 | 0.755 | 0.049 | 7.25E-18 | 10 |
| <b>SMIM1</b>      | 3.87E-21 | 0.35745313 | 1     | 0.155 | 7.74E-18 | 10 |
| <b>ERH2</b>       | 4.96E-21 | -0.3233682 | 0.882 | 0.068 | 9.92E-18 | 10 |
| <b>MDH11</b>      | 9.94E-21 | -0.2737655 | 0.864 | 0.058 | 1.99E-17 | 10 |
| <b>NCL2</b>       | 4.11E-20 | -0.5533765 | 0.909 | 0.087 | 8.23E-17 | 10 |
| <b>HDAC1</b>      | 5.54E-20 | -0.3128595 | 0.927 | 0.087 | 1.11E-16 | 10 |
| <b>HBB2</b>       | 5.88E-19 | -1.0079565 | 0.173 | 0.058 | 1.18E-15 | 10 |
| <b>CHST8</b>      | 1.34E-18 | 0.37919822 | 0.145 | 0.039 | 2.67E-15 | 10 |
| <b>CAV2</b>       | 1.65E-17 | -0.2661435 | 0.991 | 0.175 | 3.29E-14 | 10 |
| <b>ANXA3</b>      | 2.09E-17 | -0.2688105 | 0.909 | 0.097 | 4.17E-14 | 10 |
| <b>CCT21</b>      | 2.76E-17 | -0.5134395 | 0.909 | 0.097 | 5.52E-14 | 10 |
| <b>SAMD14</b>     | 4.19E-17 | 0.27701334 | 0.191 | 0.097 | 8.38E-14 | 10 |
| <b>IGFBP2</b>     | 4.68E-17 | 0.50380221 | 0.873 | 0.068 | 9.35E-14 | 10 |
| <b>HIST1H2AE1</b> | 7.06E-17 | -0.2593997 | 0.964 | 0.155 | 1.41E-13 | 10 |
| <b>CA1</b>        | 2.60E-16 | -0.4389654 | 0.555 | 0.019 | 5.20E-13 | 10 |
| <b>ZNF778</b>     | 3.12E-16 | -0.704542  | 1     | 0.194 | 6.24E-13 | 10 |
| <b>CPNE51</b>     | 3.30E-16 | 0.28076466 | 0.2   | 0.049 | 6.60E-13 | 10 |
| <b>MTSS1</b>      | 7.24E-16 | -0.4590792 | 0.964 | 0.165 | 1.45E-12 | 10 |
| <b>NDUFA8</b>     | 1.78E-15 | -0.263868  | 0.209 | 0.049 | 3.56E-12 | 10 |
| <b>S100A87</b>    | 1.84E-15 | -0.8992143 | 0.218 | 0.155 | 3.67E-12 | 10 |
| <b>MOB1B</b>      | 2.19E-15 | -0.6437291 | 0.991 | 0.194 | 4.38E-12 | 10 |



|                   |          |            |       |       |          |    |
|-------------------|----------|------------|-------|-------|----------|----|
| <b>PARD3</b>      | 2.75E-15 | 0.47406488 | 0.209 | 0.049 | 5.50E-12 | 10 |
| <b>HIST1H2AG1</b> | 3.15E-15 | -0.2770482 | 0.218 | 0.107 | 6.29E-12 | 10 |
| <b>MNDA</b>       | 1.02E-14 | -0.3209176 | 0.564 | 0.039 | 2.03E-11 | 10 |
| <b>GP6</b>        | 5.19E-14 | 0.3442576  | 0.955 | 0.204 | 1.04E-10 | 10 |
| <b>GSTP12</b>     | 6.29E-14 | -0.4989476 | 0.982 | 0.204 | 1.26E-10 | 10 |
| <b>HMGN21</b>     | 2.80E-13 | -0.7299748 | 0.245 | 0.097 | 5.59E-10 | 10 |
| <b>TXN2</b>       | 3.49E-13 | -0.3464176 | 0.955 | 0.194 | 6.98E-10 | 10 |
| <b>MYCT1</b>      | 8.83E-13 | -0.4064753 | 0.909 | 0.155 | 1.77E-09 | 10 |
| <b>PRTFDC1</b>    | 1.16E-12 | -0.4149414 | 0.9   | 0.146 | 2.31E-09 | 10 |
| <b>ANK1</b>       | 2.82E-12 | 0.26447774 | 0.245 | 0.039 | 5.65E-09 | 10 |
| <b>STMN12</b>     | 2.94E-12 | -0.3379279 | 0.518 | 0.049 | 5.88E-09 | 10 |
| <b>GALM1</b>      | 3.54E-12 | -0.3693489 | 0.818 | 0.068 | 7.08E-09 | 10 |
| <b>SMS</b>        | 6.82E-12 | -0.2954784 | 0.982 | 0.233 | 1.36E-08 | 10 |
| <b>PSMA61</b>     | 2.06E-11 | -0.5642046 | 0.873 | 0.136 | 4.12E-08 | 10 |
| <b>GLUL</b>       | 1.21E-10 | 0.29738821 | 0.982 | 0.282 | 2.42E-07 | 10 |
| <b>CTSW1</b>      | 1.23E-10 | 0.37268978 | 0.273 | 0.087 | 2.47E-07 | 10 |
| <b>MEIS1</b>      | 2.04E-10 | -0.2819608 | 0.836 | 0.117 | 4.07E-07 | 10 |
| <b>BEND2</b>      | 2.88E-10 | -0.3118855 | 0.8   | 0.078 | 5.76E-07 | 10 |
| <b>ZFP36L22</b>   | 3.21E-10 | -0.3167602 | 0.455 | 0.049 | 6.42E-07 | 10 |
| <b>SNRPE1</b>     | 3.84E-10 | -0.3302044 | 0.427 | 0.039 | 7.67E-07 | 10 |
| <b>11-Sep</b>     | 4.37E-10 | 0.34430914 | 1     | 0.311 | 8.75E-07 | 10 |
| <b>PPP1R14A</b>   | 5.93E-10 | 0.43489119 | 0.873 | 0.175 | 1.19E-06 | 10 |

|                 |          |            |       |       |            |    |
|-----------------|----------|------------|-------|-------|------------|----|
| <b>NPM11</b>    | 1.73E-09 | -0.6181594 | 0.264 | 0.087 | 3.47E-06   | 10 |
| <b>CALR1</b>    | 1.98E-09 | -0.3436057 | 0.291 | 0.068 | 3.95E-06   | 10 |
| <b>COPS3</b>    | 2.01E-09 | -0.4027681 | 0.773 | 0.078 | 4.02E-06   | 10 |
| <b>HSPA53</b>   | 2.29E-09 | -0.5967027 | 0.655 | 0.087 | 4.59E-06   | 10 |
| <b>SEC61G2</b>  | 3.43E-09 | -1.0324136 | 0.9   | 0.194 | 6.87E-06   | 10 |
| <b>S100A91</b>  | 6.55E-09 | 0.5379231  | 0.3   | 0.087 | 1.31E-05   | 10 |
| <b>SLC25A51</b> | 1.01E-08 | -0.4283975 | 0.836 | 0.146 | 2.03E-05   | 10 |
| <b>TNS1</b>     | 1.10E-08 | -0.2730249 | 0.355 | 0.029 | 2.20E-05   | 10 |
| <b>ZFP362</b>   | 1.33E-08 | -0.4170748 | 0.282 | 0.058 | 2.65E-05   | 10 |
| <b>CTTN</b>     | 1.33E-08 | 0.51924207 | 0.955 | 0.301 | 2.65E-05   | 10 |
| <b>CCT82</b>    | 2.35E-08 | -0.33749   | 0.755 | 0.058 | 4.70E-05   | 10 |
| <b>1-Jun</b>    | 3.74E-08 | -0.503506  | 0.2   | 0.058 | 7.49E-05   | 10 |
| <b>SUB11</b>    | 4.83E-08 | -0.494673  | 0.873 | 0.194 | 9.66E-05   | 10 |
| <b>HBD</b>      | 6.72E-08 | 0.40998362 | 0.736 | 0.049 | 0.00013431 | 10 |
| <b>MTDH1</b>    | 1.17E-07 | -0.3203323 | 0.791 | 0.117 | 0.00023484 | 10 |
| <b>PA2G42</b>   | 2.66E-07 | -0.303838  | 0.355 | 0.049 | 0.0005321  | 10 |
| <b>LXN</b>      | 3.43E-07 | -0.5014015 | 0.791 | 0.126 | 0.00068601 | 10 |
| <b>AATK</b>     | 4.64E-07 | -0.2907361 | 0.764 | 0.097 | 0.00092728 | 10 |
| <b>SLC40A1</b>  | 5.65E-07 | 0.26171642 | 1     | 0.388 | 0.00112993 | 10 |
| <b>PTCRA</b>    | 6.03E-07 | 0.49909694 | 0.982 | 0.447 | 0.0012065  | 10 |
| <b>EEF1A11</b>  | 6.21E-07 | -0.3152576 | 1     | 0.35  | 0.00124106 | 10 |

|                 |          |            |       |       |            |    |
|-----------------|----------|------------|-------|-------|------------|----|
| <b>PPIB1</b>    | 6.27E-07 | -0.6977537 | 0.855 | 0.194 | 0.00125359 | 10 |
| <b>WDR742</b>   | 9.55E-07 | -0.2858942 | 0.282 | 0.019 | 0.00191004 | 10 |
| <b>PLA2G12A</b> | 1.20E-06 | 0.42926294 | 0.982 | 0.398 | 0.0024011  | 10 |
| <b>ATP5MC32</b> | 1.28E-06 | -0.2790126 | 0.764 | 0.107 | 0.00255473 | 10 |
| <b>PDIA61</b>   | 1.81E-06 | -0.3471375 | 0.745 | 0.087 | 0.00361777 | 10 |
| <b>HBG2</b>     | 2.36E-06 | 0.47772213 | 0.336 | 0.049 | 0.00472725 | 10 |
| <b>CDKN1A1</b>  | 3.13E-06 | 0.31466069 | 0.982 | 0.437 | 0.00625066 | 10 |
| <b>RAMP1</b>    | 8.40E-06 | -0.2885911 | 0.355 | 0.068 | 0.01680942 | 10 |
| <b>HBA1</b>     | 1.19E-05 | -1.0054395 | 0.345 | 0.049 | 0.02370242 | 10 |
| <b>SNCA</b>     | 2.17E-05 | 0.28805275 | 0.955 | 0.427 | 0.04339281 | 10 |
| <b>LAT1</b>     | 2.19E-05 | 0.27839337 | 0.9   | 0.369 | 0.0438648  | 10 |
| <b>NT5C3A1</b>  | 3.11E-05 | 0.34262434 | 1     | 0.505 | 0.06213907 | 10 |
| <b>ETFA1</b>    | 3.35E-05 | 0.31494581 | 1     | 0.466 | 0.06702377 | 10 |
| <b>NUDT1</b>    | 3.39E-05 | -0.3731593 | 0.318 | 0.068 | 0.06778689 | 10 |
| <b>RHOC</b>     | 5.93E-05 | 0.50611667 | 0.818 | 0.262 | 0.1186482  | 10 |
| <b>RPN12</b>    | 6.12E-05 | -0.4042341 | 0.727 | 0.107 | 0.12246924 | 10 |
| <b>ARHGAP6</b>  | 6.38E-05 | 0.26756439 | 0.982 | 0.476 | 0.12765146 | 10 |
| <b>HSPE13</b>   | 6.42E-05 | -0.3458659 | 0.264 | 0.049 | 0.12831944 | 10 |
| <b>GUCY1A1</b>  | 7.48E-05 | 0.34974213 | 0.364 | 0.039 | 0.14961449 | 10 |
| <b>MZT11</b>    | 7.64E-05 | -0.2599589 | 0.636 | 0.039 | 0.15274328 | 10 |
| <b>GTF3C61</b>  | 7.85E-05 | 0.40822402 | 0.882 | 0.359 | 0.15693185 | 10 |
| <b>MINDY1</b>   | 8.17E-05 | 0.28633546 | 0.782 | 0.204 | 0.16339408 | 10 |

|                   |            |            |       |       |            |    |
|-------------------|------------|------------|-------|-------|------------|----|
| <b>RPS27L2</b>    | 9.15E-05   | -0.6159107 | 0.818 | 0.214 | 0.18293233 | 10 |
| <b>CNN2</b>       | 0.00016234 | -0.3433552 | 0.418 | 0.175 | 0.32468549 | 10 |
| <b>MAP3K7CL</b>   | 0.00018882 | 0.27467461 | 1     | 0.476 | 0.37763737 | 10 |
| <b>HIST1H4H1</b>  | 0.0002095  | -0.6813678 | 0.736 | 0.136 | 0.41899267 | 10 |
| <b>CMTM5</b>      | 0.00021589 | 0.55406331 | 1     | 0.825 | 0.43178703 | 10 |
| <b>MCM71</b>      | 0.00033789 | -0.3195537 | 0.191 | 0.029 | 0.67578454 | 10 |
| <b>SLIRP1</b>     | 0.00041065 | -0.2704874 | 0.209 | 0.039 | 0.82129861 | 10 |
| <b>RGS18</b>      | 0.00056527 | 0.37056488 | 1     | 0.854 | 1          | 10 |
| <b>SLC35B1</b>    | 0.0006183  | -0.2501348 | 0.555 | 0.049 | 1          | 10 |
| <b>TXNDC171</b>   | 0.00081759 | -0.284855  | 0.7   | 0.107 | 1          | 10 |
| <b>F13A1</b>      | 0.00081812 | -0.7304843 | 0.809 | 0.68  | 1          | 10 |
| <b>RPLP01</b>     | 0.00082471 | -0.9069182 | 0.709 | 0.117 | 1          | 10 |
| <b>SMIM3</b>      | 0.00116364 | 0.50041406 | 0.855 | 0.456 | 1          | 10 |
| <b>FSTL1</b>      | 0.00130146 | 0.56616819 | 0.655 | 0.058 | 1          | 10 |
| <b>CA2</b>        | 0.00148635 | 0.54962464 | 1     | 0.524 | 1          | 10 |
| <b>HNRNPA2B1</b>  | 0.00157316 | -0.4363674 | 0.527 | 0.34  | 1          | 10 |
| <b>ATP5MC11</b>   | 0.00181872 | -0.2953137 | 0.182 | 0.039 | 1          | 10 |
| <b>AL731557.1</b> | 0.00192875 | 0.66731183 | 0.955 | 0.476 | 1          | 10 |
| <b>MIF2</b>       | 0.00210174 | -0.6119289 | 0.727 | 0.155 | 1          | 10 |
| <b>ACRBP</b>      | 0.00226084 | 0.34443016 | 1     | 0.699 | 1          | 10 |
| <b>TSPAN13</b>    | 0.0024578  | 0.47668387 | 0.664 | 0.087 | 1          | 10 |

|                  |            |            |       |       |   |    |
|------------------|------------|------------|-------|-------|---|----|
| <b>TUBA1C</b>    | 0.00309568 | 0.37480297 | 1     | 0.544 | 1 | 10 |
| <b>BCL2L1</b>    | 0.00392692 | 0.38110013 | 0.682 | 0.126 | 1 | 10 |
| <b>SNAP231</b>   | 0.00440288 | 0.42085718 | 0.9   | 0.602 | 1 | 10 |
| <b>HSP90AB11</b> | 0.00546443 | -0.3655581 | 0.409 | 0.078 | 1 | 10 |
| <b>RAN2</b>      | 0.00563513 | -0.4355993 | 0.691 | 0.126 | 1 | 10 |
| <b>PLEK2</b>     | 0.006395   | -0.6628342 | 0.927 | 0.398 | 1 | 10 |
| <b>PPIA2</b>     | 0.00929064 | -0.3561187 | 0.882 | 0.369 | 1 | 10 |
| <b>SMOX</b>      | 0.01018527 | 0.30537437 | 0.482 | 0.291 | 1 | 10 |
| <b>GAS2L1</b>    | 0.01090239 | 0.30895951 | 0.864 | 0.485 | 1 | 10 |
| <b>GP9</b>       | 0.01266934 | 0.25412658 | 1     | 0.893 | 1 | 10 |
| <b>EFHC2</b>     | 0.01474886 | -0.4167103 | 0.655 | 0.097 | 1 | 10 |
| <b>CD742</b>     | 0.0151317  | -0.3322745 | 0.664 | 0.117 | 1 | 10 |
| <b>COTL14</b>    | 0.01513699 | 0.28101536 | 0.973 | 0.718 | 1 | 10 |
| <b>LIMS1</b>     | 0.01696448 | 0.30595125 | 0.991 | 0.777 | 1 | 10 |
| <b>CLEC1B</b>    | 0.01729372 | 0.26354045 | 1     | 0.709 | 1 | 10 |
| <b>ID2</b>       | 0.01865018 | -0.4117448 | 0.155 | 0.049 | 1 | 10 |
| <b>PKHD1L1</b>   | 0.02134879 | -0.361028  | 0.682 | 0.146 | 1 | 10 |
| <b>SLC25A371</b> | 0.02510596 | -0.7928906 | 0.436 | 0.049 | 1 | 10 |
| <b>MCEMP1</b>    | 0.02532917 | -0.5106169 | 0.645 | 0.097 | 1 | 10 |
| <b>PRKAR2B</b>   | 0.02722451 | 0.5230364  | 1     | 0.728 | 1 | 10 |
| <b>ANKRD281</b>  | 0.03221387 | -0.4355567 | 0.691 | 0.165 | 1 | 10 |
| <b>YWHAH</b>     | 0.0338281  | 0.26655067 | 0.964 | 0.806 | 1 | 10 |

|                   |            |            |       |       |   |    |
|-------------------|------------|------------|-------|-------|---|----|
| <b>H2AFV2</b>     | 0.04038168 | -0.4307762 | 0.645 | 0.107 | 1 | 10 |
| <b>MTRNR2L12</b>  | 0.04854072 | -0.2998748 | 0.755 | 0.563 | 1 | 10 |
| <b>SPARC</b>      | 0.05062706 | -0.3342517 | 0.955 | 0.718 | 1 | 10 |
| <b>NME4</b>       | 0.06373456 | 0.25490413 | 0.491 | 0.165 | 1 | 10 |
| <b>ABCC3</b>      | 0.06834343 | 0.33113949 | 0.709 | 0.262 | 1 | 10 |
| <b>S100A63</b>    | 0.07181734 | -1.0351499 | 0.545 | 0.223 | 1 | 10 |
| <b>S100A44</b>    | 0.07375635 | -0.5628848 | 0.7   | 0.204 | 1 | 10 |
| <b>KLHDC8B</b>    | 0.07616635 | 0.42720233 | 0.645 | 0.155 | 1 | 10 |
| <b>CXCL16</b>     | 0.09729291 | -0.291562  | 0.609 | 0.078 | 1 | 10 |
| <b>PSMB81</b>     | 0.09857986 | -0.2509869 | 0.673 | 0.175 | 1 | 10 |
| <b>TPST2</b>      | 0.14519054 | 0.43960304 | 0.764 | 0.447 | 1 | 10 |
| <b>LDHB1</b>      | 0.15741039 | -0.2808119 | 0.491 | 0.097 | 1 | 10 |
| <b>EIF2S21</b>    | 0.16063022 | -0.7095377 | 0.455 | 0.117 | 1 | 10 |
| <b>HIST1H3H</b>   | 0.16422559 | -0.5470152 | 0.645 | 0.398 | 1 | 10 |
| <b>AL031005.1</b> | 0.20221168 | -0.5245346 | 0.582 | 0.058 | 1 | 10 |
| <b>BLVRB1</b>     | 0.2901196  | -0.3010729 | 0.573 | 0.058 | 1 | 10 |
| <b>RHOBTB1</b>    | 0.36251817 | 0.52455765 | 0.564 | 0.058 | 1 | 10 |
| <b>ACTG11</b>     | 0.37505842 | -0.4729819 | 0.891 | 0.621 | 1 | 10 |
| <b>F2R</b>        | 0.38338087 | -0.2685756 | 0.718 | 0.311 | 1 | 10 |
| <b>EIF2AK1</b>    | 0.39845245 | -0.3210074 | 0.718 | 0.427 | 1 | 10 |
| <b>IFI272</b>     | 0.40033576 | 0.60596155 | 0.555 | 0.214 | 1 | 10 |

|                   |            |            |       |       |          |    |
|-------------------|------------|------------|-------|-------|----------|----|
| <b>KDELR21</b>    | 0.40882726 | -0.2719311 | 0.509 | 0.068 | 1        | 10 |
| <b>AC090409.1</b> | 0.41909304 | -0.2584666 | 0.7   | 0.282 | 1        | 10 |
| <b>CCT6A1</b>     | 0.43072113 | 0.28719921 | 0.555 | 0.049 | 1        | 10 |
| <b>MYL91</b>      | 0.43883644 | -0.2706375 | 0.918 | 0.709 | 1        | 10 |
| <b>CST71</b>      | 0.46020167 | 0.57591189 | 0.982 | 0.709 | 1        | 10 |
| <b>ACSM3</b>      | 0.46900149 | -0.850655  | 0.282 | 0.039 | 1        | 10 |
| <b>TRAPPC3L</b>   | 0.47196458 | -0.4690318 | 0.627 | 0.165 | 1        | 10 |
| <b>FRMD3</b>      | 0.63454438 | 0.44802919 | 0.682 | 0.301 | 1        | 10 |
| <b>MMP1</b>       | 0.63530949 | 0.39420247 | 0.491 | 0.029 | 1        | 10 |
| <b>PSMB22</b>     | 0.65420187 | -0.3068711 | 0.527 | 0.087 | 1        | 10 |
| <b>IFITM31</b>    | 0.77313389 | 0.54787437 | 0.891 | 0.777 | 1        | 10 |
| <b>GIPC3</b>      | 0.81118407 | 0.2568133  | 0.5   | 0.019 | 1        | 10 |
| <b>FADS2</b>      | 0.83948605 | -0.3175463 | 0.518 | 0.068 | 1        | 10 |
| <b>NINJ11</b>     | 0.86842895 | -0.2691373 | 0.555 | 0.117 | 1        | 10 |
| <b>GATA2</b>      | 0.90927441 | 0.32091024 | 0.518 | 0.029 | 1        | 10 |
| <b>XK</b>         | 0.91841826 | -0.2540339 | 0.582 | 0.165 | 1        | 10 |
| <b>GGCT</b>       | 0.94567631 | -0.266574  | 0.518 | 0.039 | 1        | 10 |
| <b>MT-CO21</b>    | 0.96184772 | 0.29819738 | 0.964 | 0.883 | 1        | 10 |
| <b>PTCH21</b>     | 4.58E-30   | -0.3551208 | 1     | 0.037 | 9.16E-27 | 11 |
| <b>IGKV1-51</b>   | 9.97E-29   | -0.2631169 | 0.973 | 0.037 | 1.99E-25 | 11 |
| <b>TARS</b>       | 1.15E-26   | -0.3047019 | 0.973 | 0.049 | 2.30E-23 | 11 |
| <b>PDCD52</b>     | 5.37E-26   | -0.3057361 | 0.91  | 0.024 | 1.07E-22 | 11 |

|                  |          |            |       |       |          |    |
|------------------|----------|------------|-------|-------|----------|----|
| <b>CCL4L23</b>   | 6.81E-25 | -0.4782628 | 0.964 | 0.061 | 1.36E-21 | 11 |
| <b>HSPB111</b>   | 1.41E-24 | -0.273662  | 0.946 | 0.037 | 2.82E-21 | 11 |
| <b>C1QC2</b>     | 1.36E-23 | -0.2860715 | 0.892 | 0.049 | 2.71E-20 | 11 |
| <b>LDLRAD4</b>   | 2.98E-23 | -0.3543152 | 0.964 | 0.061 | 5.96E-20 | 11 |
| <b>PDK4</b>      | 6.84E-23 | -0.537797  | 1     | 0.098 | 1.37E-19 | 11 |
| <b>SPARC1</b>    | 3.82E-22 | 0.29786374 | 0.108 | 0     | 7.64E-19 | 11 |
| <b>NDUFAB11</b>  | 6.98E-22 | -0.4778656 | 0.865 | 0.049 | 1.40E-18 | 11 |
| <b>FKBP22</b>    | 1.62E-21 | -0.3719795 | 0.946 | 0.085 | 3.24E-18 | 11 |
| <b>COMTD11</b>   | 1.76E-21 | -0.4185143 | 0.946 | 0.061 | 3.51E-18 | 11 |
| <b>HLA-DQA11</b> | 3.41E-21 | -0.5082185 | 0.91  | 0.073 | 6.82E-18 | 11 |
| <b>HSPA1B</b>    | 2.34E-20 | -0.3076627 | 0.766 | 0.024 | 4.69E-17 | 11 |
| <b>GBP11</b>     | 2.66E-20 | -0.2827568 | 0.946 | 0.073 | 5.32E-17 | 11 |
| <b>KPNA2</b>     | 2.73E-20 | -0.3789009 | 0.946 | 0.073 | 5.46E-17 | 11 |
| <b>LMNB1</b>     | 2.73E-20 | -0.4275344 | 0.946 | 0.073 | 5.46E-17 | 11 |
| <b>BANF1</b>     | 2.81E-20 | -0.3618561 | 0.847 | 0.037 | 5.62E-17 | 11 |
| <b>GLDN</b>      | 3.27E-20 | -0.3114011 | 0.748 | 0.024 | 6.53E-17 | 11 |
| <b>ZNF503</b>    | 5.03E-19 | 0.278329   | 0.883 | 0.024 | 1.01E-15 | 11 |
| <b>CH25H1</b>    | 5.58E-19 | 0.35247775 | 0.874 | 0.037 | 1.12E-15 | 11 |
| <b>SEMA4A1</b>   | 3.95E-18 | -0.387116  | 0.946 | 0.098 | 7.91E-15 | 11 |
| <b>FCGR3A2</b>   | 5.00E-18 | -0.8533754 | 0.964 | 0.122 | 1.00E-14 | 11 |
| <b>PSMB92</b>    | 5.76E-18 | -0.4695057 | 0.946 | 0.098 | 1.15E-14 | 11 |



|                  |          |            |       |       |          |    |
|------------------|----------|------------|-------|-------|----------|----|
| <b>TUBB2A</b>    | 6.65E-18 | -0.3957754 | 0.892 | 0.061 | 1.33E-14 | 11 |
| <b>PTGER41</b>   | 1.31E-17 | -0.4940826 | 0.162 | 0.073 | 2.61E-14 | 11 |
| <b>CENPN</b>     | 1.74E-17 | -0.2504797 | 0.676 | 0.024 | 3.47E-14 | 11 |
| <b>PSMA42</b>    | 1.94E-17 | -0.264961  | 0.937 | 0.098 | 3.87E-14 | 11 |
| <b>THBD</b>      | 1.69E-16 | 0.7871928  | 0.162 | 0     | 3.37E-13 | 11 |
| <b>MGST1</b>     | 2.56E-16 | 0.30406576 | 0.802 | 0.012 | 5.13E-13 | 11 |
| <b>C1QA1</b>     | 4.15E-16 | -0.7185597 | 0.82  | 0.098 | 8.30E-13 | 11 |
| <b>TUFM2</b>     | 7.72E-16 | -0.2954237 | 0.18  | 0.049 | 1.54E-12 | 11 |
| <b>PHTF1</b>     | 1.22E-15 | -0.3164415 | 0.892 | 0.073 | 2.44E-12 | 11 |
| <b>IDH22</b>     | 3.16E-15 | -0.3068202 | 0.18  | 0.024 | 6.33E-12 | 11 |
| <b>RHOB2</b>     | 5.95E-15 | -0.6661561 | 0.946 | 0.134 | 1.19E-11 | 11 |
| <b>TFDP1</b>     | 1.20E-14 | -0.3001096 | 0.829 | 0.024 | 2.39E-11 | 11 |
| <b>HLA-DPA12</b> | 3.90E-14 | -0.6032556 | 0.973 | 0.171 | 7.80E-11 | 11 |
| <b>S100A121</b>  | 1.10E-13 | 0.35756376 | 0.937 | 0.159 | 2.21E-10 | 11 |
| <b>SCGB3A1</b>   | 1.20E-13 | -0.3443286 | 0.532 | 0.012 | 2.40E-10 | 11 |
| <b>MT1X1</b>     | 1.40E-13 | 0.25836927 | 0.82  | 0.024 | 2.79E-10 | 11 |
| <b>C5AR2</b>     | 1.41E-13 | -0.5887204 | 0.883 | 0.098 | 2.81E-10 | 11 |
| <b>RGCC2</b>     | 2.54E-13 | 0.25232899 | 0.982 | 0.207 | 5.09E-10 | 11 |
| <b>PSMA31</b>    | 4.13E-13 | -0.4467314 | 0.919 | 0.134 | 8.25E-10 | 11 |
| <b>MEF2C2</b>    | 4.51E-13 | -0.4515198 | 1     | 0.207 | 9.01E-10 | 11 |
| <b>C1QB1</b>     | 6.19E-13 | -0.9851519 | 0.694 | 0.085 | 1.24E-09 | 11 |
| <b>TNFAIP61</b>  | 7.07E-13 | -0.310417  | 0.865 | 0.085 | 1.41E-09 | 11 |

|                 |          |            |       |       |          |    |
|-----------------|----------|------------|-------|-------|----------|----|
| <b>CXCL8</b>    | 7.28E-13 | 0.53765491 | 0.91  | 0.146 | 1.46E-09 | 11 |
| <b>TMED101</b>  | 7.52E-13 | -0.2579218 | 0.856 | 0.085 | 1.50E-09 | 11 |
| <b>HES41</b>    | 1.73E-12 | -0.5553781 | 0.973 | 0.195 | 3.46E-09 | 11 |
| <b>BZW2</b>     | 1.81E-12 | 0.25177897 | 0.18  | 0.012 | 3.62E-09 | 11 |
| <b>HMOX1</b>    | 3.22E-12 | -0.3973598 | 0.892 | 0.122 | 6.44E-09 | 11 |
| <b>HMGB23</b>   | 5.74E-12 | -0.3615311 | 0.982 | 0.207 | 1.15E-08 | 11 |
| <b>CCL32</b>    | 6.56E-12 | 0.31965903 | 0.838 | 0.073 | 1.31E-08 | 11 |
| <b>FPR1</b>     | 7.40E-12 | -0.2989933 | 0.243 | 0.11  | 1.48E-08 | 11 |
| <b>CENPF</b>    | 8.03E-12 | -0.4170142 | 0.568 | 0.024 | 1.61E-08 | 11 |
| <b>CSF1R</b>    | 1.29E-11 | -0.899464  | 0.252 | 0.122 | 2.58E-08 | 11 |
| <b>EDN1</b>     | 1.31E-11 | -0.273727  | 0.604 | 0.024 | 2.63E-08 | 11 |
| <b>TRGC2</b>    | 1.45E-11 | -0.3222723 | 0.495 | 0.024 | 2.91E-08 | 11 |
| <b>SIGLEC1</b>  | 2.95E-11 | 0.52038186 | 0.793 | 0.037 | 5.91E-08 | 11 |
| <b>CFD</b>      | 4.24E-11 | -0.3561847 | 0.91  | 0.159 | 8.49E-08 | 11 |
| <b>TCF7L2</b>   | 5.36E-11 | -0.6026776 | 0.27  | 0.159 | 1.07E-07 | 11 |
| <b>TUBB1</b>    | 6.75E-11 | 0.25736003 | 0.207 | 0     | 1.35E-07 | 11 |
| <b>P4HB1</b>    | 2.37E-10 | 0.25376428 | 0.261 | 0.11  | 4.74E-07 | 11 |
| <b>MZB11</b>    | 2.92E-10 | -0.3093985 | 0.45  | 0.024 | 5.84E-07 | 11 |
| <b>CUX1</b>     | 4.27E-10 | 0.5732989  | 0.252 | 0.037 | 8.55E-07 | 11 |
| <b>ATP5MC33</b> | 4.80E-10 | 0.26315466 | 0.252 | 0.024 | 9.60E-07 | 11 |
| <b>MYCBP</b>    | 4.96E-10 | -0.2592386 | 0.667 | 0.024 | 9.93E-07 | 11 |

|                 |          |            |       |       |            |    |
|-----------------|----------|------------|-------|-------|------------|----|
| <b>SLC2A61</b>  | 5.00E-10 | -0.3679306 | 0.865 | 0.134 | 1.00E-06   | 11 |
| <b>CTSA</b>     | 6.18E-10 | 0.33452569 | 0.847 | 0.122 | 1.24E-06   | 11 |
| <b>ELL21</b>    | 6.50E-10 | -0.3777304 | 0.856 | 0.122 | 1.30E-06   | 11 |
| <b>GBP5</b>     | 7.05E-10 | -0.3060093 | 0.261 | 0.049 | 1.41E-06   | 11 |
| <b>RPS27L3</b>  | 1.02E-09 | -0.4369935 | 0.27  | 0.073 | 2.05E-06   | 11 |
| <b>TCF41</b>    | 1.31E-09 | -0.5279305 | 0.829 | 0.098 | 2.62E-06   | 11 |
| <b>CTSC2</b>    | 1.59E-09 | -0.3486363 | 0.883 | 0.159 | 3.18E-06   | 11 |
| <b>SMC4</b>     | 1.68E-09 | 0.38986459 | 0.225 | 0.012 | 3.35E-06   | 11 |
| <b>CCT6A2</b>   | 2.35E-09 | -0.4180778 | 0.261 | 0.049 | 4.71E-06   | 11 |
| <b>NLRP3</b>    | 3.74E-09 | 0.340988   | 0.982 | 0.293 | 7.49E-06   | 11 |
| <b>UBE2J11</b>  | 5.15E-09 | -0.4682392 | 0.306 | 0.171 | 1.03E-05   | 11 |
| <b>IFNGR2</b>   | 5.16E-09 | 0.53865874 | 0.91  | 0.244 | 1.03E-05   | 11 |
| <b>SNAP232</b>  | 8.35E-09 | -0.3398092 | 0.793 | 0.073 | 1.67E-05   | 11 |
| <b>ARL6IP1</b>  | 1.14E-08 | -0.5513689 | 0.297 | 0.11  | 2.29E-05   | 11 |
| <b>ATP5F1A1</b> | 1.42E-08 | 0.48663902 | 0.279 | 0.049 | 2.83E-05   | 11 |
| <b>EREG</b>     | 1.57E-08 | 0.35520477 | 0.919 | 0.244 | 3.14E-05   | 11 |
| <b>VMO1</b>     | 2.27E-08 | -0.3265101 | 0.477 | 0.024 | 4.53E-05   | 11 |
| <b>CORO1A2</b>  | 2.36E-08 | -0.2724529 | 0.324 | 0.195 | 4.72E-05   | 11 |
| <b>GSTP13</b>   | 2.58E-08 | 0.27705165 | 0.847 | 0.159 | 5.16E-05   | 11 |
| <b>RNF144B1</b> | 3.11E-08 | -0.391325  | 0.964 | 0.256 | 6.22E-05   | 11 |
| <b>XIST5</b>    | 5.80E-08 | -0.5826041 | 1     | 0.293 | 0.00011609 | 11 |
| <b>XBP11</b>    | 1.45E-07 | 0.52859089 | 0.748 | 0.049 | 0.00029029 | 11 |

|                  |          |            |       |       |            |    |
|------------------|----------|------------|-------|-------|------------|----|
| <b>CDKN1A2</b>   | 1.45E-07 | 0.43646483 | 0.829 | 0.171 | 0.00029074 | 11 |
| <b>ATP1B31</b>   | 2.05E-07 | -0.3058339 | 0.82  | 0.134 | 0.00040986 | 11 |
| <b>FGL2</b>      | 2.10E-07 | -0.4398959 | 0.82  | 0.159 | 0.0004204  | 11 |
| <b>FPR2</b>      | 7.38E-07 | 0.35791011 | 0.532 | 0     | 0.00147521 | 11 |
| <b>LST11</b>     | 8.57E-07 | -0.8810265 | 0.946 | 0.268 | 0.00171342 | 11 |
| <b>F13A11</b>    | 9.33E-07 | -0.2752186 | 0.315 | 0.049 | 0.00186613 | 11 |
| <b>DHFR</b>      | 1.48E-06 | 0.25499181 | 0.532 | 0     | 0.00296899 | 11 |
| <b>CLEC4A</b>    | 1.51E-06 | 0.25375903 | 0.486 | 0.024 | 0.00302616 | 11 |
| <b>LILRB1</b>    | 2.77E-06 | -0.6954236 | 0.396 | 0.256 | 0.00553257 | 11 |
| <b>CSTA</b>      | 4.12E-06 | 0.57299012 | 0.703 | 0.024 | 0.00824087 | 11 |
| <b>HLA-DRB12</b> | 5.69E-06 | -0.3348262 | 0.991 | 0.341 | 0.01137413 | 11 |
| <b>IFI273</b>    | 7.29E-06 | 0.3406102  | 0.676 | 0.012 | 0.01458428 | 11 |
| <b>JAML2</b>     | 1.08E-05 | -0.7000362 | 0.405 | 0.232 | 0.02157994 | 11 |
| <b>HEY1</b>      | 1.18E-05 | -0.2779801 | 0.27  | 0.024 | 0.02361687 | 11 |
| <b>HCK</b>       | 1.68E-05 | -0.3597829 | 0.369 | 0.134 | 0.03350738 | 11 |
| <b>MT2A6</b>     | 1.68E-05 | -0.9713873 | 0.982 | 0.329 | 0.03367007 | 11 |
| <b>CD36</b>      | 1.79E-05 | -0.3633443 | 0.378 | 0.159 | 0.03578283 | 11 |
| <b>CKAP21</b>    | 1.95E-05 | -0.672811  | 0.378 | 0.146 | 0.03906033 | 11 |
| <b>LGALS12</b>   | 2.79E-05 | -0.322474  | 0.865 | 0.244 | 0.05574141 | 11 |
| <b>GADD45B3</b>  | 2.91E-05 | -0.3105573 | 0.901 | 0.28  | 0.0582235  | 11 |
| <b>CXCL21</b>    | 3.90E-05 | -0.3252335 | 0.748 | 0.11  | 0.07808521 | 11 |

|                  |            |            |       |       |            |    |
|------------------|------------|------------|-------|-------|------------|----|
| <b>NUCB21</b>    | 7.92E-05   | -0.2768375 | 0.667 | 0.037 | 0.1584854  | 11 |
| <b>PTGS1</b>     | 9.33E-05   | 0.32952845 | 0.189 | 0     | 0.18659184 | 11 |
| <b>TUBA1C1</b>   | 0.000107   | 0.39605643 | 0.342 | 0.012 | 0.21400727 | 11 |
| <b>MAP3K83</b>   | 0.00012627 | 0.25797778 | 0.973 | 0.402 | 0.2525394  | 11 |
| <b>S100A45</b>   | 0.00012763 | -0.3520595 | 1     | 0.402 | 0.25525285 | 11 |
| <b>HMGB14</b>    | 0.0001396  | 0.3071629  | 0.964 | 0.427 | 0.27920235 | 11 |
| <b>FTH11</b>     | 0.00015929 | -0.3726079 | 0.946 | 0.927 | 0.31857612 | 11 |
| <b>IFI44L4</b>   | 0.00017271 | 0.43619111 | 0.667 | 0.037 | 0.34542008 | 11 |
| <b>NUDT11</b>    | 0.00017575 | -0.352187  | 0.658 | 0.049 | 0.35149967 | 11 |
| <b>WARS1</b>     | 0.00017922 | -0.3177414 | 0.423 | 0.207 | 0.35843129 | 11 |
| <b>ACTN1</b>     | 0.0002007  | 0.32923158 | 0.658 | 0.024 | 0.40139064 | 11 |
| <b>ACTG12</b>    | 0.00023909 | -0.3796666 | 0.432 | 0.232 | 0.4781892  | 11 |
| <b>NCL3</b>      | 0.00027528 | -0.3333016 | 0.414 | 0.171 | 0.55056832 | 11 |
| <b>HDLBP1</b>    | 0.00041519 | -0.3032385 | 0.378 | 0.061 | 0.8303898  | 11 |
| <b>PLAUR</b>     | 0.00054886 | -0.6971453 | 0.486 | 0.293 | 1          | 11 |
| <b>Z93241.12</b> | 0.00061013 | -0.521962  | 0.378 | 0.049 | 1          | 11 |
| <b>SIGLEC10</b>  | 0.0007167  | -0.6228713 | 0.613 | 0.098 | 1          | 11 |
| <b>AIF11</b>     | 0.00073471 | -0.3937071 | 0.829 | 0.244 | 1          | 11 |
| <b>SLC25A372</b> | 0.00088971 | 0.26758494 | 0.793 | 0.244 | 1          | 11 |
| <b>SNRNP25</b>   | 0.00131258 | -0.2839481 | 0.243 | 0.024 | 1          | 11 |
| <b>THBS11</b>    | 0.00181363 | 0.34003085 | 0.432 | 0.22  | 1          | 11 |
| <b>KLF102</b>    | 0.00197735 | -0.2624701 | 0.847 | 0.293 | 1          | 11 |

|                   |            |            |       |       |   |    |
|-------------------|------------|------------|-------|-------|---|----|
| <b>ANXA51</b>     | 0.00208886 | 0.32522748 | 0.739 | 0.183 | 1 | 11 |
| <b>HIST1H2AC1</b> | 0.0020894  | -0.275304  | 0.631 | 0.085 | 1 | 11 |
| <b>C5AR11</b>     | 0.00225692 | -0.2535083 | 0.739 | 0.171 | 1 | 11 |
| <b>PSAP1</b>      | 0.00273404 | -0.5498077 | 0.604 | 0.463 | 1 | 11 |
| <b>CYTOR2</b>     | 0.00389966 | 0.30186494 | 0.64  | 0.037 | 1 | 11 |
| <b>SMIM251</b>    | 0.00419161 | -0.4833369 | 0.432 | 0.122 | 1 | 11 |
| <b>ANPEP</b>      | 0.00494801 | 0.31483134 | 0.423 | 0.11  | 1 | 11 |
| <b>DDAH2</b>      | 0.00586898 | 0.34997611 | 0.396 | 0.024 | 1 | 11 |
| <b>CMC1</b>       | 0.00673221 | 0.25747542 | 0.351 | 0     | 1 | 11 |
| <b>LYN1</b>       | 0.00715314 | -0.4806305 | 0.495 | 0.244 | 1 | 11 |
| <b>S100A88</b>    | 0.0079833  | 0.3180911  | 0.991 | 0.695 | 1 | 11 |
| <b>MS4A7</b>      | 0.0118435  | -0.5483664 | 0.775 | 0.232 | 1 | 11 |
| <b>LILRA1</b>     | 0.01228447 | 0.42603268 | 0.604 | 0.037 | 1 | 11 |
| <b>MT-ATP82</b>   | 0.01510414 | -0.7503499 | 0.874 | 0.744 | 1 | 11 |
| <b>PSMB82</b>     | 0.0203424  | -0.4127196 | 0.658 | 0.098 | 1 | 11 |
| <b>SERPINA11</b>  | 0.02156413 | -0.2689575 | 0.495 | 0.207 | 1 | 11 |
| <b>HLA-DRA2</b>   | 0.02294868 | -0.5460495 | 0.811 | 0.293 | 1 | 11 |
| <b>CCT22</b>      | 0.02307292 | -0.358072  | 0.631 | 0.061 | 1 | 11 |
| <b>S100A92</b>    | 0.02555654 | 0.46016333 | 0.766 | 0.402 | 1 | 11 |
| <b>MT-ND4L3</b>   | 0.02863412 | -0.2672295 | 0.955 | 0.951 | 1 | 11 |
| <b>ISOC21</b>     | 0.03098043 | -0.3329128 | 0.234 | 0.024 | 1 | 11 |

|                  |            |            |       |       |   |    |
|------------------|------------|------------|-------|-------|---|----|
| <b>TPI11</b>     | 0.03755223 | -0.2804112 | 0.631 | 0.11  | 1 | 11 |
| <b>TMEM2081</b>  | 0.04421371 | 0.2506299  | 0.414 | 0.012 | 1 | 11 |
| <b>EIF4A32</b>   | 0.04576569 | -0.3007271 | 0.45  | 0.073 | 1 | 11 |
| <b>PARVB</b>     | 0.04971927 | -0.3802888 | 0.441 | 0.049 | 1 | 11 |
| <b>TRIB1</b>     | 0.06095881 | 0.39145801 | 0.45  | 0.073 | 1 | 11 |
| <b>MINDY11</b>   | 0.06572884 | -0.2528577 | 0.523 | 0.037 | 1 | 11 |
| <b>NR4A1</b>     | 0.06787713 | -0.6874037 | 0.73  | 0.22  | 1 | 11 |
| <b>LDHA2</b>     | 0.07589694 | -0.3975689 | 0.694 | 0.183 | 1 | 11 |
| <b>BCL2A11</b>   | 0.07949952 | -0.6125415 | 0.568 | 0.268 | 1 | 11 |
| <b>CLEC7A</b>    | 0.08567736 | -0.2990333 | 0.892 | 0.427 | 1 | 11 |
| <b>HSH2D3</b>    | 0.09152248 | 0.28830929 | 0.414 | 0.012 | 1 | 11 |
| <b>CCL43</b>     | 0.09676745 | -0.7206158 | 0.604 | 0.061 | 1 | 11 |
| <b>GAPDH2</b>    | 0.10171119 | -0.3134391 | 0.613 | 0.329 | 1 | 11 |
| <b>HLA-DMA</b>   | 0.11505663 | -0.3612782 | 0.622 | 0.11  | 1 | 11 |
| <b>H2AFZ1</b>    | 0.13554916 | -0.4864132 | 0.613 | 0.085 | 1 | 11 |
| <b>HLA-DRB52</b> | 0.15419157 | -0.4756975 | 0.523 | 0.171 | 1 | 11 |
| <b>EIF2S22</b>   | 0.18933458 | -0.3151387 | 0.486 | 0.085 | 1 | 11 |
| <b>IGSF61</b>    | 0.21207728 | -0.3635945 | 0.613 | 0.11  | 1 | 11 |
| <b>NCF12</b>     | 0.2271152  | 0.34400101 | 0.73  | 0.354 | 1 | 11 |
| <b>FTL1</b>      | 0.25823653 | -0.4116565 | 0.829 | 0.585 | 1 | 11 |
| <b>SPI11</b>     | 0.31815189 | -0.3733558 | 0.73  | 0.451 | 1 | 11 |
| <b>ATP5MC12</b>  | 0.32678291 | -0.395329  | 0.495 | 0.073 | 1 | 11 |

|                  |            |            |       |       |          |    |
|------------------|------------|------------|-------|-------|----------|----|
| <b>CDKN1C</b>    | 0.3442168  | -0.4025077 | 0.162 | 0.049 | 1        | 11 |
| <b>CAPG</b>      | 0.35204589 | 0.25064265 | 0.459 | 0.024 | 1        | 11 |
| <b>SLC31A2</b>   | 0.35635701 | -0.4213209 | 0.523 | 0.122 | 1        | 11 |
| <b>PPIA3</b>     | 0.55137654 | -0.3014955 | 0.595 | 0.122 | 1        | 11 |
| <b>NDUFAF31</b>  | 0.61319616 | 0.25825711 | 0.351 | 0.012 | 1        | 11 |
| <b>HLA-DPB12</b> | 0.67004622 | -0.5884151 | 0.604 | 0.146 | 1        | 11 |
| <b>TIMP13</b>    | 0.69080038 | -0.4363464 | 0.649 | 0.293 | 1        | 11 |
| <b>P2RY131</b>   | 0.73253831 | -0.6427795 | 0.577 | 0.11  | 1        | 11 |
| <b>FAM110A</b>   | 0.75163688 | -0.388404  | 0.505 | 0.061 | 1        | 11 |
| <b>ETS21</b>     | 0.76165088 | -0.6038321 | 0.676 | 0.256 | 1        | 11 |
| <b>IFITM24</b>   | 0.77379127 | -0.3201858 | 0.631 | 0.256 | 1        | 11 |
| <b>GRN</b>       | 0.95669214 | -0.2570653 | 0.649 | 0.256 | 1        | 11 |
| <b>JCHAIN1</b>   | 1.34E-21   | -0.2591252 | 0.974 | 0.036 | 2.68E-18 | 12 |
| <b>TRBV10-31</b> | 9.79E-18   | -0.5669549 | 0.842 | 0.036 | 1.96E-14 | 12 |
| <b>TRBV12-31</b> | 5.49E-17   | -0.3062585 | 0.868 | 0.024 | 1.10E-13 | 12 |
| <b>TRBV30</b>    | 1.98E-16   | -0.2882438 | 0.842 | 0.036 | 3.95E-13 | 12 |
| <b>KLRC1</b>     | 3.12E-15   | 0.28397624 | 0.947 | 0.083 | 6.23E-12 | 12 |
| <b>TRAV21</b>    | 6.48E-13   | -0.3900092 | 0.842 | 0.036 | 1.30E-09 | 12 |
| <b>HJURP</b>     | 5.45E-12   | 1.03338088 | 0.895 | 0.155 | 1.09E-08 | 12 |
| <b>LYZ1</b>      | 2.60E-11   | 1.04020701 | 0.184 | 0.083 | 5.20E-08 | 12 |
| <b>TRAV12-3</b>  | 2.95E-11   | -0.5189674 | 0.816 | 0.036 | 5.90E-08 | 12 |



|                  |            |            |       |       |            |    |
|------------------|------------|------------|-------|-------|------------|----|
| <b>HIST1H2BM</b> | 5.87E-11   | 0.35277438 | 0.737 | 0.012 | 1.17E-07   | 12 |
| <b>CPOX</b>      | 1.09E-09   | 0.37363608 | 0.763 | 0.06  | 2.17E-06   | 12 |
| <b>HIST1H3H1</b> | 1.22E-09   | 0.68887941 | 1     | 0.214 | 2.45E-06   | 12 |
| <b>IGKC2</b>     | 5.21E-08   | -1.8484113 | 0.526 | 0.06  | 0.00010415 | 12 |
| <b>HIST1H3G</b>  | 5.95E-08   | 0.74164889 | 0.895 | 0.167 | 0.00011909 | 12 |
| <b>KIF2C</b>     | 1.02E-07   | 0.25012914 | 0.789 | 0.167 | 0.0002043  | 12 |
| <b>CLIC3</b>     | 1.75E-07   | 0.27673723 | 0.237 | 0.048 | 0.00035063 | 12 |
| <b>S100A89</b>   | 3.72E-07   | 0.65938727 | 0.947 | 0.214 | 0.00074336 | 12 |
| <b>PRC1</b>      | 4.74E-07   | 0.5445247  | 0.868 | 0.167 | 0.00094765 | 12 |
| <b>TRBV28</b>    | 5.22E-07   | -0.3008239 | 0.605 | 0.012 | 0.0010437  | 12 |
| <b>PPBP4</b>     | 2.03E-06   | 0.31058193 | 0.737 | 0.036 | 0.00406653 | 12 |
| <b>CENPE</b>     | 2.73E-06   | 0.30838119 | 1     | 0.31  | 0.00545981 | 12 |
| <b>ADGRG1</b>    | 3.41E-06   | 0.32447679 | 0.263 | 0.024 | 0.00681977 | 12 |
| <b>HIST1H2BH</b> | 4.99E-06   | 0.46573638 | 0.289 | 0.107 | 0.00998504 | 12 |
| <b>DTHD11</b>    | 5.67E-06   | 0.36626649 | 0.289 | 0.012 | 0.01133404 | 12 |
| <b>IFI274</b>    | 2.92E-05   | -0.446519  | 0.868 | 0.19  | 0.05833763 | 12 |
| <b>ENC11</b>     | 3.82E-05   | 0.36198801 | 0.789 | 0.119 | 0.07649179 | 12 |
| <b>KIF18B</b>    | 5.28E-05   | 0.3559321  | 0.105 | 0     | 0.10554339 | 12 |
| <b>FANCI</b>     | 0.00010012 | 0.27099259 | 0.947 | 0.393 | 0.20024314 | 12 |
| <b>HIST2H2BF</b> | 0.0001366  | 0.30596706 | 0.763 | 0.107 | 0.27320328 | 12 |
| <b>EBP</b>       | 0.00019968 | 0.26774686 | 1     | 0.452 | 0.39936792 | 12 |
| <b>NCAPG</b>     | 0.00027205 | 0.33264329 | 0.842 | 0.25  | 0.54409229 | 12 |

|                   |            |            |       |       |            |    |
|-------------------|------------|------------|-------|-------|------------|----|
| <b>SGO2</b>       | 0.00032447 | -0.2532543 | 0.895 | 0.238 | 0.64893822 | 12 |
| <b>KIFC1</b>      | 0.00034123 | 0.55379328 | 0.789 | 0.19  | 0.68246971 | 12 |
| <b>IGKV3D-11</b>  | 0.00047998 | -0.3550433 | 0.184 | 0.012 | 0.95995558 | 12 |
| <b>IGHM1</b>      | 0.00059978 | -1.5641324 | 0.342 | 0.06  | 1          | 12 |
| <b>GNLY1</b>      | 0.0006268  | 1.13068313 | 0.816 | 0.214 | 1          | 12 |
| <b>GMNN</b>       | 0.00063222 | 0.29552768 | 0.868 | 0.333 | 1          | 12 |
| <b>CKAP2L</b>     | 0.00074042 | 0.3302547  | 0.737 | 0.179 | 1          | 12 |
| <b>AURKB</b>      | 0.00089349 | 0.30099819 | 0.711 | 0.143 | 1          | 12 |
| <b>MEF2C3</b>     | 0.00091357 | -0.2861995 | 0.342 | 0.06  | 1          | 12 |
| <b>LEF1</b>       | 0.00094246 | -0.3190896 | 0.895 | 0.25  | 1          | 12 |
| <b>HIST2H2AC1</b> | 0.00162488 | 0.26940307 | 1     | 0.44  | 1          | 12 |
| <b>SHCBP1</b>     | 0.00166899 | 0.3920258  | 0.868 | 0.298 | 1          | 12 |
| <b>HACD31</b>     | 0.0021307  | 0.32250909 | 0.921 | 0.345 | 1          | 12 |
| <b>SPON2</b>      | 0.00247189 | 0.32562339 | 0.763 | 0.179 | 1          | 12 |
| <b>EZH21</b>      | 0.00248565 | 0.41746588 | 1     | 0.56  | 1          | 12 |
| <b>KPNA21</b>     | 0.00413733 | 0.28208799 | 0.947 | 0.464 | 1          | 12 |
| <b>HMGA11</b>     | 0.00428758 | 0.393162   | 0.947 | 0.583 | 1          | 12 |
| <b>NCAPD2</b>     | 0.0049988  | 0.56512663 | 0.895 | 0.369 | 1          | 12 |
| <b>CLSPN</b>      | 0.00790906 | 0.44151299 | 1     | 0.536 | 1          | 12 |
| <b>TIMP14</b>     | 0.00846918 | -0.3090333 | 1     | 0.393 | 1          | 12 |
| <b>TUBA1B2</b>    | 0.00927185 | 0.33969749 | 1     | 0.881 | 1          | 12 |

|                  |            |            |       |       |   |    |
|------------------|------------|------------|-------|-------|---|----|
| <b>SOX42</b>     | 0.01025054 | -0.4089225 | 0.395 | 0.048 | 1 | 12 |
| <b>TUBA1C2</b>   | 0.01261396 | 0.32707096 | 0.921 | 0.476 | 1 | 12 |
| <b>S100A46</b>   | 0.01375439 | -0.3872949 | 1     | 0.881 | 1 | 12 |
| <b>HLA-DPB13</b> | 0.01548432 | 0.29650742 | 0.974 | 0.512 | 1 | 12 |
| <b>TRBV20-11</b> | 0.02299212 | -0.3996227 | 0.447 | 0.155 | 1 | 12 |
| <b>ORC6</b>      | 0.02599466 | 0.27993355 | 0.737 | 0.238 | 1 | 12 |
| <b>GZMB2</b>     | 0.02659635 | 0.82963519 | 0.684 | 0.143 | 1 | 12 |
| <b>ESCO2</b>     | 0.03167654 | -0.3832587 | 0.632 | 0.262 | 1 | 12 |
| <b>ENO11</b>     | 0.03287292 | 0.25563143 | 1     | 0.81  | 1 | 12 |
| <b>MATK</b>      | 0.03426545 | 0.44405493 | 0.421 | 0.119 | 1 | 12 |
| <b>SPN</b>       | 0.03478566 | 0.37080241 | 0.947 | 0.512 | 1 | 12 |
| <b>TMPO2</b>     | 0.04448882 | 0.31164545 | 0.947 | 0.679 | 1 | 12 |
| <b>TUBB4B2</b>   | 0.04754575 | 0.41244281 | 0.895 | 0.536 | 1 | 12 |
| <b>FBL1</b>      | 0.0483891  | 0.26224037 | 0.947 | 0.607 | 1 | 12 |
| <b>NASP1</b>     | 0.04991798 | 0.25227563 | 0.947 | 0.667 | 1 | 12 |
| <b>IL321</b>     | 0.06593109 | -0.2960783 | 1     | 0.869 | 1 | 12 |
| <b>HIST1H3C</b>  | 0.07798621 | 0.33694667 | 0.395 | 0.131 | 1 | 12 |
| <b>CCL4L24</b>   | 0.08342632 | -0.2762817 | 0.395 | 0.036 | 1 | 12 |
| <b>SAMD3</b>     | 0.09199454 | -0.3277409 | 0.684 | 0.5   | 1 | 12 |
| <b>TUBB2</b>     | 0.10226029 | 0.37146612 | 1     | 0.893 | 1 | 12 |
| <b>DDX39A</b>    | 0.14323519 | 0.26664805 | 0.921 | 0.69  | 1 | 12 |
| <b>TRBV5-6</b>   | 0.15174856 | -0.2625709 | 0.105 | 0.036 | 1 | 12 |

|                    |            |            |       |       |   |    |
|--------------------|------------|------------|-------|-------|---|----|
| <b>GZMA4</b>       | 0.1709511  | -0.2529889 | 0.868 | 0.417 | 1 | 12 |
| <b>PRDX21</b>      | 0.19523696 | -0.3818949 | 1     | 0.726 | 1 | 12 |
| <b>TMEM1562</b>    | 0.1993634  | -0.3148071 | 0.658 | 0.393 | 1 | 12 |
| <b>CENPU2</b>      | 0.20473817 | 0.2858951  | 1     | 0.631 | 1 | 12 |
| <b>PMAIP1</b>      | 0.21318229 | -0.3907488 | 0.737 | 0.583 | 1 | 12 |
| <b>CTSW2</b>       | 0.21528652 | 0.41580641 | 0.5   | 0.226 | 1 | 12 |
| <b>FRMD4B</b>      | 0.22066787 | -0.2561892 | 0.526 | 0.179 | 1 | 12 |
| <b>CENPF1</b>      | 0.22505404 | 0.67955238 | 1     | 0.702 | 1 | 12 |
| <b>HSP90AB12</b>   | 0.22693005 | 0.26539478 | 1     | 0.881 | 1 | 12 |
| <b>AC245014.32</b> | 0.23260517 | 0.43879996 | 0.711 | 0.25  | 1 | 12 |
| <b>H1FX7</b>       | 0.24658873 | 0.35942404 | 0.947 | 0.607 | 1 | 12 |
| <b>CD8A1</b>       | 0.27910362 | 0.28100768 | 0.632 | 0.143 | 1 | 12 |
| <b>HIST1H1D5</b>   | 0.31548173 | 0.54025406 | 1     | 0.869 | 1 | 12 |
| <b>CD2</b>         | 0.3391898  | 0.3689649  | 1     | 0.762 | 1 | 12 |
| <b>S100A111</b>    | 0.35590344 | -0.2719143 | 0.974 | 0.738 | 1 | 12 |
| <b>UBE2S1</b>      | 0.41642358 | 0.37027767 | 0.632 | 0.274 | 1 | 12 |
| <b>ZFP363</b>      | 0.42533457 | 0.29311574 | 1     | 0.69  | 1 | 12 |
| <b>GRASP</b>       | 0.44416327 | 0.39281165 | 0.474 | 0.024 | 1 | 12 |
| <b>DUSP4</b>       | 0.45493282 | -0.3144182 | 0.816 | 0.369 | 1 | 12 |
| <b>IL7R3</b>       | 0.45697144 | -0.5192762 | 1     | 0.548 | 1 | 12 |
| <b>TYROBP</b>      | 0.46440174 | 0.25220871 | 0.579 | 0.083 | 1 | 12 |

|                  |            |            |       |       |          |    |
|------------------|------------|------------|-------|-------|----------|----|
| <b>LIMS11</b>    | 0.57050344 | -0.3213486 | 0.947 | 0.595 | 1        | 12 |
| <b>HIST1H3B2</b> | 0.69312567 | 0.30832638 | 0.579 | 0.321 | 1        | 12 |
| <b>IGHG11</b>    | 0.72377612 | -1.237727  | 0.184 | 0.024 | 1        | 12 |
| <b>NUSAP1</b>    | 0.73472112 | -0.2881507 | 0.842 | 0.571 | 1        | 12 |
| <b>LTB</b>       | 0.73697278 | -0.6854475 | 0.816 | 0.5   | 1        | 12 |
| <b>NOSIP</b>     | 0.7913364  | -0.2587065 | 1     | 0.643 | 1        | 12 |
| <b>TRBC2</b>     | 0.79233934 | 0.33663103 | 0.947 | 0.75  | 1        | 12 |
| <b>LGALS3</b>    | 0.81011515 | -0.4145208 | 0.868 | 0.488 | 1        | 12 |
| <b>WDR743</b>    | 0.8353098  | 0.67275284 | 0.605 | 0.214 | 1        | 12 |
| <b>PRF11</b>     | 0.85007378 | 0.44536386 | 0.579 | 0.226 | 1        | 12 |
| <b>CORO1B2</b>   | 0.87806483 | -0.2987768 | 0.974 | 0.619 | 1        | 12 |
| <b>GBP51</b>     | 0.88571441 | -0.259333  | 0.842 | 0.512 | 1        | 12 |
| <b>TRBV20-12</b> | 1.72E-17   | -0.467355  | 1     | 0.043 | 3.44E-14 | 13 |
| <b>SPARC2</b>    | 2.92E-16   | -0.2761825 | 0.957 | 0.043 | 5.84E-13 | 13 |
| <b>2-Mar</b>     | 3.41E-16   | 0.3276497  | 0.957 | 0.022 | 6.82E-13 | 13 |
| <b>TRBV24-11</b> | 5.98E-16   | -0.3843183 | 1     | 0.065 | 1.20E-12 | 13 |
| <b>FERMT31</b>   | 9.80E-16   | 0.279046   | 0.971 | 0.043 | 1.96E-12 | 13 |
| <b>IMPDH2</b>    | 3.24E-15   | -0.3258046 | 0.957 | 0.043 | 6.49E-12 | 13 |
| <b>PSMD2</b>     | 7.80E-15   | 0.31428736 | 0.957 | 0.043 | 1.56E-11 | 13 |
| <b>TRBV7-2</b>   | 1.03E-14   | -0.5483363 | 0.957 | 0.043 | 2.06E-11 | 13 |
| <b>CH25H2</b>    | 1.71E-14   | -0.3227537 | 1     | 0.087 | 3.42E-11 | 13 |
| <b>NDUFB31</b>   | 7.78E-14   | -0.2735146 | 0.957 | 0.065 | 1.56E-10 | 13 |

|                  |          |            |       |       |          |    |
|------------------|----------|------------|-------|-------|----------|----|
| <b>KLRF1</b>     | 1.89E-13 | -0.2519565 | 0.957 | 0.065 | 3.77E-10 | 13 |
| <b>PLPP52</b>    | 3.88E-13 | 0.26888955 | 0.928 | 0.043 | 7.77E-10 | 13 |
| <b>CKAP22</b>    | 6.45E-13 | -0.2776531 | 0.971 | 0.087 | 1.29E-09 | 13 |
| <b>NUDT5</b>     | 7.02E-13 | -0.3329624 | 0.971 | 0.087 | 1.40E-09 | 13 |
| <b>TNFSF91</b>   | 7.49E-13 | -0.356651  | 0.986 | 0.109 | 1.50E-09 | 13 |
| <b>CKS21</b>     | 3.40E-12 | -0.3445292 | 0.942 | 0.087 | 6.81E-09 | 13 |
| <b>HIST1H1B1</b> | 4.11E-12 | -0.463225  | 0.957 | 0.087 | 8.23E-09 | 13 |
| <b>RHOC1</b>     | 4.56E-12 | 0.28286425 | 0.13  | 0     | 9.11E-09 | 13 |
| <b>IL2RB</b>     | 4.56E-12 | 0.26507148 | 0.13  | 0     | 9.11E-09 | 13 |
| <b>XCL21</b>     | 5.11E-12 | 0.62800492 | 0.783 | 0.043 | 1.02E-08 | 13 |
| <b>TRGV10</b>    | 6.24E-12 | -0.2745488 | 1     | 0.13  | 1.25E-08 | 13 |
| <b>MAP7D3</b>    | 8.21E-12 | -0.4574568 | 0.928 | 0.065 | 1.64E-08 | 13 |
| <b>CYC11</b>     | 2.27E-11 | -0.3314269 | 0.942 | 0.087 | 4.55E-08 | 13 |
| <b>GRASP1</b>    | 2.41E-11 | 0.29154723 | 0.13  | 0     | 4.83E-08 | 13 |
| <b>SH2D2A1</b>   | 4.64E-11 | -0.5106811 | 0.159 | 0.087 | 9.28E-08 | 13 |
| <b>MX13</b>      | 1.22E-10 | 0.2842446  | 0.159 | 0.043 | 2.44E-07 | 13 |
| <b>TYROBP1</b>   | 1.50E-10 | 0.62367336 | 0.826 | 0     | 2.99E-07 | 13 |
| <b>GNGT2</b>     | 2.54E-10 | -0.3768316 | 0.899 | 0.065 | 5.08E-07 | 13 |
| <b>IFI275</b>    | 4.44E-10 | 0.40102854 | 0.116 | 0     | 8.89E-07 | 13 |
| <b>HES42</b>     | 5.67E-10 | -0.5434755 | 0.986 | 0.152 | 1.13E-06 | 13 |
| <b>WARS2</b>     | 8.62E-10 | 0.46469185 | 0.159 | 0     | 1.72E-06 | 13 |

|                  |          |            |       |       |            |    |
|------------------|----------|------------|-------|-------|------------|----|
| <b>FBL2</b>      | 9.34E-10 | -0.2661382 | 0.188 | 0.109 | 1.87E-06   | 13 |
| <b>RGCC3</b>     | 9.70E-10 | -0.3044748 | 1     | 0.174 | 1.94E-06   | 13 |
| <b>IFI44L5</b>   | 1.03E-09 | 0.51434831 | 0.174 | 0     | 2.06E-06   | 13 |
| <b>TMPO3</b>     | 2.03E-09 | -0.385374  | 0.971 | 0.152 | 4.06E-06   | 13 |
| <b>TSC22D1</b>   | 2.18E-09 | -0.3413878 | 0.855 | 0.065 | 4.37E-06   | 13 |
| <b>UCHL51</b>    | 2.42E-09 | 0.37372957 | 0.855 | 0.043 | 4.84E-06   | 13 |
| <b>EIF1AY</b>    | 3.15E-09 | 0.3833832  | 0.768 | 0     | 6.30E-06   | 13 |
| <b>KIR3DL2</b>   | 4.43E-09 | 0.47233556 | 0.188 | 0.022 | 8.85E-06   | 13 |
| <b>SMC41</b>     | 7.47E-09 | 0.26081905 | 0.884 | 0.087 | 1.49E-05   | 13 |
| <b>TUBA1C3</b>   | 1.06E-08 | -0.3043315 | 0.884 | 0.087 | 2.11E-05   | 13 |
| <b>RGS2</b>      | 2.45E-08 | -0.3821122 | 0.899 | 0.109 | 4.89E-05   | 13 |
| <b>JPT12</b>     | 1.10E-07 | -0.2740358 | 1     | 0.217 | 0.00022098 | 13 |
| <b>BCL2A12</b>   | 1.11E-07 | -0.3892196 | 0.928 | 0.152 | 0.0002214  | 13 |
| <b>FXYD1</b>     | 1.22E-07 | 0.40022113 | 0.217 | 0     | 0.00024449 | 13 |
| <b>TRBV2</b>     | 1.22E-07 | 0.31813722 | 0.217 | 0     | 0.00024449 | 13 |
| <b>APOBEC3G1</b> | 1.67E-07 | -0.4696739 | 0.841 | 0.087 | 0.00033461 | 13 |
| <b>BOLA31</b>    | 3.42E-07 | -0.4893744 | 0.913 | 0.152 | 0.00068447 | 13 |
| <b>CD381</b>     | 4.44E-07 | 0.75677207 | 0.232 | 0.022 | 0.00088837 | 13 |
| <b>DDX39A1</b>   | 4.55E-07 | 0.52143679 | 0.232 | 0.043 | 0.00090992 | 13 |
| <b>MSC</b>       | 6.82E-07 | -0.4356458 | 0.841 | 0.087 | 0.00136356 | 13 |
| <b>STOM</b>      | 1.03E-06 | 0.30232233 | 0.246 | 0.043 | 0.00206074 | 13 |
| <b>DERL11</b>    | 1.18E-06 | 0.47093396 | 0.841 | 0.109 | 0.00236782 | 13 |

|                    |          |            |       |       |            |    |
|--------------------|----------|------------|-------|-------|------------|----|
| <b>IFITM32</b>     | 1.23E-06 | -0.4736747 | 0.29  | 0.217 | 0.00246321 | 13 |
| <b>TCP1</b>        | 1.32E-06 | 0.41480864 | 0.246 | 0.022 | 0.00263618 | 13 |
| <b>STT3A1</b>      | 2.06E-06 | 0.26684376 | 0.246 | 0     | 0.0041244  | 13 |
| <b>JAKMIP1</b>     | 2.06E-06 | -0.4034204 | 0.261 | 0.087 | 0.00412699 | 13 |
| <b>GBP12</b>       | 2.16E-06 | -0.2586314 | 0.826 | 0.087 | 0.00431235 | 13 |
| <b>BZW21</b>       | 3.60E-06 | -0.2712632 | 0.783 | 0.043 | 0.00720506 | 13 |
| <b>CD8A2</b>       | 4.96E-06 | -0.4376102 | 0.971 | 0.239 | 0.00992801 | 13 |
| <b>LYN2</b>        | 6.35E-06 | 0.4058549  | 0.71  | 0.022 | 0.01269728 | 13 |
| <b>CTSH1</b>       | 9.44E-06 | -0.2595183 | 0.551 | 0.043 | 0.01888256 | 13 |
| <b>TPM41</b>       | 1.03E-05 | -0.3325093 | 0.275 | 0.043 | 0.02069268 | 13 |
| <b>HIST1H1C1</b>   | 1.61E-05 | -0.3563421 | 1     | 0.283 | 0.03221561 | 13 |
| <b>LMNB11</b>      | 2.35E-05 | -0.3170457 | 0.797 | 0.087 | 0.04695189 | 13 |
| <b>HSPD13</b>      | 2.49E-05 | -0.2909686 | 0.304 | 0.109 | 0.04982281 | 13 |
| <b>FKBP111</b>     | 3.77E-05 | 0.25708728 | 0.304 | 0.13  | 0.07545221 | 13 |
| <b>ENC12</b>       | 3.85E-05 | 0.71170903 | 0.797 | 0.109 | 0.07700972 | 13 |
| <b>PPM1G1</b>      | 3.85E-05 | 0.35545081 | 0.29  | 0.043 | 0.07709601 | 13 |
| <b>RPL22L12</b>    | 4.12E-05 | 0.32626096 | 0.971 | 0.304 | 0.0824124  | 13 |
| <b>PGAM11</b>      | 4.61E-05 | -0.312177  | 0.319 | 0.13  | 0.09229534 | 13 |
| <b>MIR4435-2HC</b> | 4.96E-05 | -0.3640884 | 0.957 | 0.261 | 0.09916874 | 13 |
| <b>LAG3</b>        | 5.72E-05 | 0.26313114 | 0.304 | 0.087 | 0.11438226 | 13 |
| <b>AC007952.41</b> | 6.64E-05 | 0.35204856 | 0.304 | 0.087 | 0.13271004 | 13 |



|                    |            |            |       |       |            |    |
|--------------------|------------|------------|-------|-------|------------|----|
| <b>FXVD7</b>       | 6.97E-05   | 0.26956368 | 0.145 | 0     | 0.13942052 | 13 |
| <b>CNN21</b>       | 7.12E-05   | -0.2708388 | 0.971 | 0.283 | 0.14248499 | 13 |
| <b>TRBV27</b>      | 7.41E-05   | -0.5153262 | 0.652 | 0.065 | 0.14819956 | 13 |
| <b>HSPE14</b>      | 8.85E-05   | -0.3787454 | 0.971 | 0.283 | 0.1770308  | 13 |
| <b>S100B</b>       | 0.00013002 | -0.2516382 | 0.754 | 0.065 | 0.26004266 | 13 |
| <b>HIST1H2AC2</b>  | 0.00013635 | -0.2506134 | 0.754 | 0.065 | 0.27270831 | 13 |
| <b>H1FX8</b>       | 0.00017485 | 0.28472606 | 0.986 | 0.348 | 0.34970777 | 13 |
| <b>MAP3K84</b>     | 0.00021029 | -0.4263827 | 0.391 | 0.283 | 0.42058392 | 13 |
| <b>TXNDC172</b>    | 0.00021439 | -0.3037187 | 0.333 | 0.109 | 0.42877237 | 13 |
| <b>SELL1</b>       | 0.00028527 | 0.30263437 | 0.725 | 0.043 | 0.57054055 | 13 |
| <b>ERH3</b>        | 0.00029495 | -0.4946978 | 0.841 | 0.174 | 0.58990356 | 13 |
| <b>ITGB71</b>      | 0.00037746 | 0.25609801 | 0.333 | 0.109 | 0.75492034 | 13 |
| <b>PSMA32</b>      | 0.00048547 | 0.66321195 | 0.319 | 0.022 | 0.97093152 | 13 |
| <b>ADGRG11</b>     | 0.00058305 | 0.38027548 | 0.333 | 0.065 | 1          | 13 |
| <b>AC103591.35</b> | 0.00078714 | 0.65436651 | 0.725 | 0.065 | 1          | 13 |
| <b>GATA3</b>       | 0.00082224 | -0.2628553 | 0.362 | 0.13  | 1          | 13 |
| <b>GIMAP4</b>      | 0.0008397  | -0.4232869 | 0.783 | 0.13  | 1          | 13 |
| <b>FCGBP</b>       | 0.00091163 | 0.26778613 | 0.203 | 0     | 1          | 13 |
| <b>CHAF1A</b>      | 0.00098265 | 0.33749255 | 0.29  | 0     | 1          | 13 |
| <b>PTGDS</b>       | 0.00104625 | 0.58492764 | 0.652 | 0     | 1          | 13 |
| <b>DNAJB111</b>    | 0.00118964 | 0.41672976 | 0.333 | 0.022 | 1          | 13 |
| <b>LINC024461</b>  | 0.00188567 | -0.6419685 | 1     | 0.348 | 1          | 13 |

|                  |            |            |       |       |   |    |
|------------------|------------|------------|-------|-------|---|----|
| <b>CD71</b>      | 0.00189606 | 0.29368865 | 0.754 | 0.13  | 1 | 13 |
| <b>MT1E1</b>     | 0.0021685  | -0.3662904 | 0.783 | 0.152 | 1 | 13 |
| <b>PA2G43</b>    | 0.00254328 | -0.2792406 | 0.841 | 0.217 | 1 | 13 |
| <b>RGS1</b>      | 0.00261465 | -0.5047021 | 1     | 0.348 | 1 | 13 |
| <b>SPOCK2</b>    | 0.00342951 | 0.40777976 | 0.377 | 0.152 | 1 | 13 |
| <b>ANXA2R1</b>   | 0.00404347 | -0.2833396 | 1     | 0.37  | 1 | 13 |
| <b>VIM1</b>      | 0.00425079 | -0.4480609 | 0.565 | 0.478 | 1 | 13 |
| <b>SUPT16H</b>   | 0.00441114 | 0.58447662 | 0.348 | 0     | 1 | 13 |
| <b>CDK61</b>     | 0.00441114 | 0.39272558 | 0.652 | 0     | 1 | 13 |
| <b>IRF4</b>      | 0.00441114 | 0.32006123 | 0.348 | 0     | 1 | 13 |
| <b>IL7R4</b>     | 0.00620731 | -0.736547  | 1     | 0.37  | 1 | 13 |
| <b>SLC25A251</b> | 0.00694112 | 0.28869369 | 0.362 | 0.022 | 1 | 13 |
| <b>S100A64</b>   | 0.00773252 | -0.3888272 | 0.986 | 0.848 | 1 | 13 |
| <b>ANXA12</b>    | 0.00899385 | -0.2659068 | 0.928 | 0.348 | 1 | 13 |
| <b>LDLRAD41</b>  | 0.00929212 | 0.30397495 | 0.333 | 0     | 1 | 13 |
| <b>GZMB3</b>     | 0.00996775 | 0.40748502 | 0.406 | 0.152 | 1 | 13 |
| <b>TRBC12</b>    | 0.01076052 | -0.3397845 | 0.986 | 0.391 | 1 | 13 |
| <b>PRDM13</b>    | 0.01112048 | 0.32937785 | 0.87  | 0.391 | 1 | 13 |
| <b>TMED91</b>    | 0.01193801 | -0.3165477 | 0.696 | 0.087 | 1 | 13 |
| <b>IFI63</b>     | 0.01344429 | 0.254203   | 0.391 | 0.065 | 1 | 13 |
| <b>SSR11</b>     | 0.01394838 | -0.2900597 | 0.725 | 0.13  | 1 | 13 |

|                    |            |            |       |       |   |    |
|--------------------|------------|------------|-------|-------|---|----|
| <b>ATP2B1-AS11</b> | 0.01706984 | -0.3412995 | 0.406 | 0.087 | 1 | 13 |
| <b>MT-CO12</b>     | 0.01741683 | 0.53130886 | 1     | 1     | 1 | 13 |
| <b>PRF12</b>       | 0.01810693 | 0.27462024 | 0.406 | 0.109 | 1 | 13 |
| <b>HSH2D4</b>      | 0.01865958 | 0.64958311 | 0.638 | 0.022 | 1 | 13 |
| <b>GZMM</b>        | 0.02049363 | 0.62828838 | 0.725 | 0.174 | 1 | 13 |
| <b>LGALS13</b>     | 0.02145301 | -0.3005124 | 0.493 | 0.304 | 1 | 13 |
| <b>TUBB2A1</b>     | 0.02146288 | -0.4792882 | 0.754 | 0.174 | 1 | 13 |
| <b>HMGN22</b>      | 0.02202867 | 0.29179875 | 0.884 | 0.413 | 1 | 13 |
| <b>MT-CYB2</b>     | 0.02430012 | 0.42198576 | 0.986 | 0.87  | 1 | 13 |
| <b>CCL51</b>       | 0.02504079 | -0.2952357 | 0.971 | 0.978 | 1 | 13 |
| <b>ODC11</b>       | 0.0254251  | -0.3960061 | 0.696 | 0.109 | 1 | 13 |
| <b>TMEM1563</b>    | 0.04056868 | -0.3140624 | 0.435 | 0.109 | 1 | 13 |
| <b>MRTO4</b>       | 0.040587   | -0.2666017 | 0.638 | 0.043 | 1 | 13 |
| <b>TUBA4A2</b>     | 0.04121567 | -0.340643  | 0.986 | 0.435 | 1 | 13 |
| <b>RANBP12</b>     | 0.0418357  | -0.4214773 | 0.754 | 0.196 | 1 | 13 |
| <b>LIPA1</b>       | 0.04206851 | 0.33357968 | 0.391 | 0     | 1 | 13 |
| <b>ADH51</b>       | 0.04234667 | 0.25479522 | 0.406 | 0.043 | 1 | 13 |
| <b>MT-CO32</b>     | 0.04357682 | 0.34451241 | 1     | 0.935 | 1 | 13 |
| <b>TRAV8-2</b>     | 0.04375346 | -0.4610519 | 0.667 | 0.087 | 1 | 13 |
| <b>TOR3A1</b>      | 0.04600734 | -0.3676675 | 0.681 | 0.109 | 1 | 13 |
| <b>COTL15</b>      | 0.04647328 | -0.5297359 | 0.986 | 0.413 | 1 | 13 |
| <b>IL322</b>       | 0.05755676 | -0.5648355 | 0.957 | 0.761 | 1 | 13 |

|                  |            |            |       |       |   |    |
|------------------|------------|------------|-------|-------|---|----|
| <b>ANXA22</b>    | 0.05967307 | 0.64477642 | 0.623 | 0.043 | 1 | 13 |
| <b>ZBP12</b>     | 0.06193447 | 0.54705635 | 0.449 | 0.196 | 1 | 13 |
| <b>HNRNPA2B1</b> | 0.06572804 | 0.46364717 | 0.942 | 0.565 | 1 | 13 |
| <b>HSP90B11</b>  | 0.06979534 | 0.29427622 | 1     | 0.522 | 1 | 13 |
| <b>NME41</b>     | 0.07415403 | -0.4640091 | 0.638 | 0.065 | 1 | 13 |
| <b>SMC1A1</b>    | 0.07817025 | 0.31187814 | 0.594 | 0     | 1 | 13 |
| <b>MT-CO22</b>   | 0.08624435 | 0.35900867 | 1     | 0.957 | 1 | 13 |
| <b>RHOB3</b>     | 0.09592296 | -0.3366018 | 0.522 | 0.239 | 1 | 13 |
| <b>KLRB13</b>    | 0.0980662  | -0.4976088 | 0.71  | 0.174 | 1 | 13 |
| <b>CMC11</b>     | 0.10934105 | 0.51241084 | 0.609 | 0.043 | 1 | 13 |
| <b>POLR2H</b>    | 0.11737039 | -0.3161386 | 0.435 | 0.043 | 1 | 13 |
| <b>HLA-DRB13</b> | 0.11764135 | -0.7169332 | 0.667 | 0.435 | 1 | 13 |
| <b>SNRPE2</b>    | 0.12507184 | 0.34108404 | 0.594 | 0.022 | 1 | 13 |
| <b>ZNF7781</b>   | 0.12515285 | -0.3568629 | 0.623 | 0.065 | 1 | 13 |
| <b>SLAMF71</b>   | 0.12799593 | 0.32172814 | 0.594 | 0.022 | 1 | 13 |
| <b>MT-ATP61</b>  | 0.13240862 | 0.32845657 | 0.957 | 0.804 | 1 | 13 |
| <b>EZH2</b>      | 0.13623374 | 0.47687957 | 0.58  | 0     | 1 | 13 |
| <b>PTGDR</b>     | 0.17459949 | -0.5443596 | 0.464 | 0.109 | 1 | 13 |
| <b>UBE2J12</b>   | 0.18025204 | 0.46346057 | 0.609 | 0.065 | 1 | 13 |
| <b>IFNG1</b>     | 0.19172091 | -0.9967892 | 1     | 0.457 | 1 | 13 |
| <b>ATF51</b>     | 0.20333197 | -0.2768789 | 0.594 | 0.043 | 1 | 13 |

|                  |            |            |       |       |   |    |
|------------------|------------|------------|-------|-------|---|----|
| <b>NINJ12</b>    | 0.21094194 | 0.25185776 | 0.435 | 0.022 | 1 | 13 |
| <b>GAPDH3</b>    | 0.22062601 | -0.2967824 | 0.971 | 0.804 | 1 | 13 |
| <b>MT-ND4L4</b>  | 0.22935243 | 0.32800918 | 1     | 0.804 | 1 | 13 |
| <b>LAT2</b>      | 0.2420034  | -0.4356953 | 0.536 | 0.196 | 1 | 13 |
| <b>HMGB24</b>    | 0.27867654 | -0.3232429 | 0.754 | 0.283 | 1 | 13 |
| <b>SUB12</b>     | 0.30131623 | -0.2988492 | 0.696 | 0.543 | 1 | 13 |
| <b>ALOX5AP1</b>  | 0.30155764 | -0.6142615 | 0.609 | 0.087 | 1 | 13 |
| <b>TXN3</b>      | 0.30511727 | -0.3632484 | 0.594 | 0.283 | 1 | 13 |
| <b>HLA-DPB14</b> | 0.30884882 | -0.4142664 | 0.797 | 0.326 | 1 | 13 |
| <b>FCMR</b>      | 0.31827017 | 0.25353473 | 0.565 | 0.022 | 1 | 13 |
| <b>CD3D</b>      | 0.32583985 | -0.3087353 | 0.971 | 0.522 | 1 | 13 |
| <b>PSMD81</b>    | 0.35975808 | -0.2888269 | 0.536 | 0.174 | 1 | 13 |
| <b>ATP5F1B1</b>  | 0.36748658 | 0.30111774 | 0.507 | 0.13  | 1 | 13 |
| <b>CALR2</b>     | 0.40333066 | 0.3034754  | 0.522 | 0.152 | 1 | 13 |
| <b>CD692</b>     | 0.43581404 | 0.63042503 | 1     | 0.935 | 1 | 13 |
| <b>NCL4</b>      | 0.45100187 | -0.3185062 | 0.739 | 0.5   | 1 | 13 |
| <b>OASL</b>      | 0.48006616 | -0.3276545 | 0.841 | 0.63  | 1 | 13 |
| <b>HIST1H1D6</b> | 0.48334736 | -0.4160165 | 1     | 0.587 | 1 | 13 |
| <b>PRKDC</b>     | 0.51698573 | 0.25739045 | 0.493 | 0.065 | 1 | 13 |
| <b>ALG52</b>     | 0.56018809 | 0.28026269 | 0.464 | 0.022 | 1 | 13 |
| <b>PSMB93</b>    | 0.56865112 | -0.4125583 | 0.971 | 0.522 | 1 | 13 |
| <b>CD3G1</b>     | 0.58446733 | -0.4525622 | 1     | 0.543 | 1 | 13 |

|                 |            |            |       |       |          |    |
|-----------------|------------|------------|-------|-------|----------|----|
| <b>HERC51</b>   | 0.58982399 | 0.30145289 | 0.609 | 0.326 | 1        | 13 |
| <b>PRDX22</b>   | 0.59872382 | -0.6094427 | 0.638 | 0.174 | 1        | 13 |
| <b>CCND22</b>   | 0.62368726 | 0.3356671  | 0.493 | 0.043 | 1        | 13 |
| <b>ACTG13</b>   | 0.68273018 | -0.2879598 | 1     | 0.652 | 1        | 13 |
| <b>RPA1</b>     | 0.68973279 | -0.3748583 | 0.478 | 0.043 | 1        | 13 |
| <b>MIF3</b>     | 0.70807606 | -0.4237355 | 1     | 0.652 | 1        | 13 |
| <b>GSTP14</b>   | 0.74847112 | -0.3371341 | 0.696 | 0.283 | 1        | 13 |
| <b>S100A103</b> | 0.76413638 | -0.261245  | 0.971 | 0.674 | 1        | 13 |
| <b>TNFRSF18</b> | 0.78312773 | 0.29530947 | 0.449 | 0     | 1        | 13 |
| <b>SNRPG3</b>   | 0.78744306 | -0.5257245 | 0.652 | 0.217 | 1        | 13 |
| <b>RPA31</b>    | 0.82137772 | -0.332087  | 0.522 | 0.065 | 1        | 13 |
| <b>MT2A7</b>    | 0.86164522 | -0.3443582 | 1     | 0.696 | 1        | 13 |
| <b>IER3</b>     | 0.96477676 | 0.25102941 | 0.507 | 0.022 | 1        | 13 |
| <b>PPIA4</b>    | 0.97027977 | -0.5354481 | 0.928 | 0.5   | 1        | 13 |
| <b>SMC1A2</b>   | 3.48E-21   | -0.2739933 | 0     | 0.114 | 6.96E-18 | 14 |
| <b>DUT1</b>     | 3.48E-21   | -0.3214159 | 0     | 0.114 | 6.96E-18 | 14 |
| <b>CKLF2</b>    | 1.83E-20   | -0.2731687 | 1     | 0.029 | 3.66E-17 | 14 |
| <b>EZH23</b>    | 6.45E-19   | -0.451887  | 0     | 0.186 | 1.29E-15 | 14 |
| <b>YWHAQ2</b>   | 1.31E-18   | -0.2842215 | 0.027 | 0.157 | 2.61E-15 | 14 |
| <b>CST31</b>    | 1.25E-17   | -0.3499779 | 0.946 | 0.043 | 2.50E-14 | 14 |
| <b>PIF1</b>     | 6.30E-17   | -0.2784312 | 0.919 | 0.043 | 1.26E-13 | 14 |

|                   |          |            |       |       |          |    |
|-------------------|----------|------------|-------|-------|----------|----|
| <b>SNRPG4</b>     | 1.45E-16 | -0.5906708 | 0.054 | 0.214 | 2.89E-13 | 14 |
| <b>HIST1H2AL1</b> | 1.58E-16 | -0.2536272 | 1     | 0.071 | 3.16E-13 | 14 |
| <b>HIST1H4H2</b>  | 1.58E-16 | -0.2602895 | 1     | 0.071 | 3.16E-13 | 14 |
| <b>HIST1H2BC1</b> | 2.31E-15 | -0.3005863 | 1     | 0.086 | 4.63E-12 | 14 |
| <b>NPC2</b>       | 3.38E-15 | -0.2779325 | 0.946 | 0.071 | 6.76E-12 | 14 |
| <b>GAPDH4</b>     | 7.59E-15 | -0.6466456 | 0.081 | 0.243 | 1.52E-11 | 14 |
| <b>IFIT3</b>      | 8.03E-15 | 0.46810611 | 0.108 | 0.014 | 1.61E-11 | 14 |
| <b>CCT71</b>      | 2.32E-14 | -0.3032969 | 1     | 0.1   | 4.64E-11 | 14 |
| <b>ARL6IP11</b>   | 1.37E-13 | -0.8920501 | 0.108 | 0.286 | 2.74E-10 | 14 |
| <b>AQP31</b>      | 2.42E-13 | -0.266114  | 1     | 0.114 | 4.83E-10 | 14 |
| <b>ADI11</b>      | 3.17E-13 | -0.2651118 | 1     | 0.114 | 6.34E-10 | 14 |
| <b>ENDOD1</b>     | 3.17E-13 | -0.2665534 | 1     | 0.114 | 6.34E-10 | 14 |
| <b>CRNDE</b>      | 3.17E-13 | -0.2959545 | 1     | 0.114 | 6.34E-10 | 14 |
| <b>HIST1H2AM1</b> | 3.17E-13 | -0.3072374 | 1     | 0.114 | 6.34E-10 | 14 |
| <b>TPI12</b>      | 3.17E-13 | -0.3216596 | 1     | 0.114 | 6.34E-10 | 14 |
| <b>PSMA62</b>     | 3.17E-13 | -0.3551501 | 1     | 0.114 | 6.34E-10 | 14 |
| <b>TMEM106C1</b>  | 3.17E-13 | -0.3702539 | 1     | 0.114 | 6.34E-10 | 14 |
| <b>CCT6A3</b>     | 3.17E-13 | -0.3761748 | 1     | 0.114 | 6.34E-10 | 14 |
| <b>MYBL21</b>     | 3.17E-13 | -0.4149108 | 1     | 0.114 | 6.34E-10 | 14 |
| <b>HIST1H3G1</b>  | 3.17E-13 | -0.4361595 | 1     | 0.114 | 6.34E-10 | 14 |
| <b>KIFC11</b>     | 3.02E-12 | -0.2696488 | 1     | 0.129 | 6.03E-09 | 14 |
| <b>HLTF1</b>      | 3.02E-12 | -0.3250716 | 1     | 0.129 | 6.03E-09 | 14 |

|                   |          |            |       |       |          |    |
|-------------------|----------|------------|-------|-------|----------|----|
| <b>AURKB1</b>     | 3.02E-12 | -0.3568611 | 1     | 0.129 | 6.03E-09 | 14 |
| <b>ODC12</b>      | 3.02E-12 | -0.3699485 | 1     | 0.129 | 6.03E-09 | 14 |
| <b>MCUR1</b>      | 3.02E-12 | -0.3802549 | 1     | 0.129 | 6.03E-09 | 14 |
| <b>TMED102</b>    | 3.02E-12 | -0.3995326 | 1     | 0.129 | 6.03E-09 | 14 |
| <b>TLN11</b>      | 3.02E-12 | -0.4075522 | 1     | 0.129 | 6.03E-09 | 14 |
| <b>RPN13</b>      | 3.02E-12 | -0.4465143 | 1     | 0.129 | 6.03E-09 | 14 |
| <b>NCL5</b>       | 3.02E-12 | -0.4827787 | 1     | 0.129 | 6.03E-09 | 14 |
| <b>MBOAT2</b>     | 7.72E-12 | -0.6568771 | 0.135 | 0.343 | 1.54E-08 | 14 |
| <b>KCNH2</b>      | 1.88E-11 | -0.3964246 | 1     | 0.143 | 3.76E-08 | 14 |
| <b>ATP5F1A2</b>   | 2.53E-11 | -0.2521249 | 1     | 0.143 | 5.05E-08 | 14 |
| <b>CALR3</b>      | 2.53E-11 | -0.2598044 | 1     | 0.143 | 5.05E-08 | 14 |
| <b>MIR22HG1</b>   | 2.53E-11 | -0.3904169 | 1     | 0.143 | 5.05E-08 | 14 |
| <b>NDUFAB12</b>   | 2.53E-11 | -0.4406391 | 1     | 0.143 | 5.05E-08 | 14 |
| <b>HIST2H2AC2</b> | 2.53E-11 | -0.4548799 | 1     | 0.143 | 5.05E-08 | 14 |
| <b>KIF15</b>      | 2.53E-11 | -0.4934527 | 1     | 0.143 | 5.05E-08 | 14 |
| <b>NFIX</b>       | 2.76E-11 | 0.61595116 | 1     | 0.157 | 5.53E-08 | 14 |
| <b>SLC43A3</b>    | 3.96E-11 | -0.4307219 | 0.811 | 0.086 | 7.93E-08 | 14 |
| <b>TNS11</b>      | 6.57E-11 | -0.4544621 | 0.162 | 0.271 | 1.31E-07 | 14 |
| <b>SEC131</b>     | 7.78E-11 | -0.3195198 | 0.919 | 0.086 | 1.56E-07 | 14 |
| <b>MTCH2</b>      | 1.30E-10 | -0.4240509 | 0.919 | 0.129 | 2.60E-07 | 14 |
| <b>NEK2</b>       | 1.87E-10 | -0.345921  | 1     | 0.157 | 3.75E-07 | 14 |



|                |          |            |       |       |          |    |
|----------------|----------|------------|-------|-------|----------|----|
| <b>KNSTRN</b>  | 1.87E-10 | -0.372269  | 1     | 0.157 | 3.75E-07 | 14 |
| <b>EPRS1</b>   | 1.87E-10 | -0.3937859 | 1     | 0.157 | 3.75E-07 | 14 |
| <b>PPIB2</b>   | 1.87E-10 | -0.4101705 | 1     | 0.157 | 3.75E-07 | 14 |
| <b>EXOSC8</b>  | 1.87E-10 | -0.4245108 | 1     | 0.157 | 3.75E-07 | 14 |
| <b>SPINT2</b>  | 1.87E-10 | -0.4471579 | 1     | 0.157 | 3.75E-07 | 14 |
| <b>VRK1</b>    | 1.87E-10 | -0.5186414 | 1     | 0.157 | 3.75E-07 | 14 |
| <b>MFSD2B</b>  | 2.56E-10 | -0.4240637 | 0.189 | 0.186 | 5.11E-07 | 14 |
| <b>MRPL13</b>  | 2.93E-10 | -0.3431606 | 0.811 | 0.086 | 5.86E-07 | 14 |
| <b>PCK2</b>    | 3.16E-10 | -0.3711502 | 0.811 | 0.1   | 6.32E-07 | 14 |
| <b>TPM1</b>    | 3.16E-10 | -0.3737463 | 0.811 | 0.1   | 6.32E-07 | 14 |
| <b>RPA32</b>   | 1.04E-09 | -0.5520486 | 1     | 0.171 | 2.07E-06 | 14 |
| <b>NDUFA81</b> | 1.24E-09 | -0.2813343 | 1     | 0.171 | 2.48E-06 | 14 |
| <b>PARVB1</b>  | 1.24E-09 | -0.3245847 | 1     | 0.171 | 2.48E-06 | 14 |
| <b>RACGAP1</b> | 1.24E-09 | -0.4207048 | 1     | 0.171 | 2.48E-06 | 14 |
| <b>KIF11</b>   | 1.24E-09 | -0.4346909 | 1     | 0.171 | 2.48E-06 | 14 |
| <b>KIF14</b>   | 1.24E-09 | -0.4955334 | 1     | 0.171 | 2.48E-06 | 14 |
| <b>KIF4A</b>   | 1.24E-09 | -0.5024664 | 1     | 0.171 | 2.48E-06 | 14 |
| <b>SGO21</b>   | 1.24E-09 | -0.553669  | 1     | 0.171 | 2.48E-06 | 14 |
| <b>ANK11</b>   | 1.37E-09 | -0.4232489 | 0.189 | 0.386 | 2.75E-06 | 14 |
| <b>ATP1B32</b> | 1.83E-09 | -0.3122551 | 0.946 | 0.157 | 3.67E-06 | 14 |
| <b>UQCC21</b>  | 2.19E-09 | -0.308871  | 0.811 | 0.114 | 4.37E-06 | 14 |
| <b>SAT1</b>    | 4.59E-09 | -0.2838853 | 1     | 0.186 | 9.18E-06 | 14 |

|                   |          |            |       |       |            |    |
|-------------------|----------|------------|-------|-------|------------|----|
| <b>PSMD82</b>     | 5.00E-09 | -0.287605  | 1     | 0.186 | 1.00E-05   | 14 |
| <b>RRM2</b>       | 7.33E-09 | -0.4205597 | 1     | 0.186 | 1.47E-05   | 14 |
| <b>HIST1H2AC3</b> | 7.33E-09 | -0.4733425 | 1     | 0.186 | 1.47E-05   | 14 |
| <b>HIST1H3B3</b>  | 7.33E-09 | -0.5358474 | 1     | 0.186 | 1.47E-05   | 14 |
| <b>HIST1H1D7</b>  | 7.33E-09 | -0.86063   | 1     | 0.186 | 1.47E-05   | 14 |
| <b>LXN1</b>       | 1.33E-08 | -0.303958  | 0.811 | 0.129 | 2.66E-05   | 14 |
| <b>MTDH2</b>      | 1.61E-08 | -0.3052104 | 0.919 | 0.129 | 3.23E-05   | 14 |
| <b>ISG151</b>     | 1.87E-08 | 0.88761411 | 0.216 | 0.014 | 3.74E-05   | 14 |
| <b>TPST21</b>     | 2.13E-08 | -0.3595109 | 1     | 0.2   | 4.26E-05   | 14 |
| <b>RAB13</b>      | 2.61E-08 | -0.2811238 | 1     | 0.2   | 5.22E-05   | 14 |
| <b>VBP11</b>      | 3.91E-08 | -0.2919977 | 1     | 0.2   | 7.82E-05   | 14 |
| <b>SMC2</b>       | 3.91E-08 | -0.3780042 | 1     | 0.2   | 7.82E-05   | 14 |
| <b>MRPL511</b>    | 3.91E-08 | -0.4026658 | 1     | 0.2   | 7.82E-05   | 14 |
| <b>WDR34</b>      | 3.91E-08 | -0.5557899 | 1     | 0.2   | 7.82E-05   | 14 |
| <b>HSPA54</b>     | 4.32E-08 | -0.4397747 | 0.892 | 0.114 | 8.65E-05   | 14 |
| <b>TFR2</b>       | 7.14E-08 | -0.3684452 | 0.811 | 0.143 | 0.00014281 | 14 |
| <b>H2AFX</b>      | 7.14E-08 | -0.4482733 | 0.811 | 0.143 | 0.00014281 | 14 |
| <b>DHRS13</b>     | 8.09E-08 | -0.2513541 | 1     | 0.214 | 0.00016172 | 14 |
| <b>LMAN21</b>     | 9.27E-08 | -0.3227056 | 0.919 | 0.157 | 0.0001855  | 14 |
| <b>CENPA</b>      | 1.10E-07 | -0.2940807 | 1     | 0.214 | 0.00022065 | 14 |
| <b>SLC40A11</b>   | 1.10E-07 | -0.3667133 | 1     | 0.214 | 0.00022065 | 14 |

|                    |          |            |       |       |            |    |
|--------------------|----------|------------|-------|-------|------------|----|
| <b>AL138963.33</b> | 1.15E-07 | -0.3006219 | 0.243 | 0.114 | 0.00022915 | 14 |
| <b>ADD2</b>        | 1.19E-07 | -0.5010798 | 1     | 0.214 | 0.00023836 | 14 |
| <b>AC103876.1</b>  | 1.39E-07 | -0.5237795 | 1     | 0.214 | 0.000278   | 14 |
| <b>STMN13</b>      | 1.89E-07 | -0.3834721 | 1     | 0.214 | 0.00037727 | 14 |
| <b>PRC11</b>       | 1.89E-07 | -0.517519  | 1     | 0.214 | 0.00037727 | 14 |
| <b>HMMR</b>        | 1.89E-07 | -0.6289883 | 1     | 0.214 | 0.00037727 | 14 |
| <b>EIF2S23</b>     | 1.89E-07 | -0.6395416 | 1     | 0.214 | 0.00037727 | 14 |
| <b>BUB11</b>       | 1.89E-07 | -0.6709477 | 1     | 0.214 | 0.00037727 | 14 |
| <b>CDCA5</b>       | 2.88E-07 | -0.3096516 | 0.568 | 0.071 | 0.00057568 | 14 |
| <b>TARS1</b>       | 3.42E-07 | -0.5455921 | 0.811 | 0.157 | 0.00068457 | 14 |
| <b>HJURP1</b>      | 3.85E-07 | -0.3700774 | 1     | 0.229 | 0.0007703  | 14 |
| <b>ERFE</b>        | 5.36E-07 | -0.425861  | 1     | 0.229 | 0.0010717  | 14 |
| <b>HMGB31</b>      | 5.98E-07 | -0.4724308 | 1     | 0.229 | 0.00119538 | 14 |
| <b>CKAP2L1</b>     | 6.20E-07 | -0.4845513 | 1     | 0.229 | 0.00123959 | 14 |
| <b>AURKA</b>       | 8.27E-07 | -0.4807387 | 1     | 0.229 | 0.00165458 | 14 |
| <b>CKS1B</b>       | 8.27E-07 | -0.494035  | 1     | 0.229 | 0.00165458 | 14 |
| <b>IDH23</b>       | 8.27E-07 | -0.5349229 | 1     | 0.229 | 0.00165458 | 14 |
| <b>TSPAN131</b>    | 8.27E-07 | -0.6664768 | 1     | 0.229 | 0.00165458 | 14 |
| <b>MDH12</b>       | 1.35E-06 | -0.5104768 | 0.919 | 0.171 | 0.00269843 | 14 |
| <b>IFI27L1</b>     | 1.50E-06 | -0.3668718 | 0.568 | 0.086 | 0.00299088 | 14 |
| <b>C2orf88</b>     | 1.55E-06 | -0.3662545 | 1     | 0.243 | 0.00310598 | 14 |
| <b>UBE2S2</b>      | 1.72E-06 | -0.5054985 | 1     | 0.243 | 0.00344831 | 14 |

|                  |          |            |       |       |            |    |
|------------------|----------|------------|-------|-------|------------|----|
| <b>VDAC3</b>     | 1.85E-06 | -0.3436942 | 1     | 0.243 | 0.00369637 | 14 |
| <b>H2AFV3</b>    | 2.35E-06 | -0.3404169 | 1     | 0.243 | 0.00470678 | 14 |
| <b>LSM51</b>     | 3.31E-06 | -0.374326  | 1     | 0.243 | 0.00662082 | 14 |
| <b>NDUFB61</b>   | 3.31E-06 | -0.4946171 | 1     | 0.243 | 0.00662082 | 14 |
| <b>HNRNPAB1</b>  | 3.31E-06 | -0.5971524 | 1     | 0.243 | 0.00662082 | 14 |
| <b>HIST1H2BJ</b> | 3.31E-06 | -0.6066916 | 1     | 0.243 | 0.00662082 | 14 |
| <b>KIF23</b>     | 3.31E-06 | -0.6463377 | 1     | 0.243 | 0.00662082 | 14 |
| <b>RPS27L4</b>   | 5.37E-06 | -0.5058279 | 0.973 | 0.229 | 0.0107319  | 14 |
| <b>RAD51AP1</b>  | 6.69E-06 | -0.4054511 | 0.568 | 0.1   | 0.01337504 | 14 |
| <b>NSD2</b>      | 6.78E-06 | -0.2509555 | 1     | 0.257 | 0.01355706 | 14 |
| <b>PLK1</b>      | 8.52E-06 | -0.6021944 | 1     | 0.257 | 0.01703092 | 14 |
| <b>KPNA22</b>    | 8.79E-06 | -0.6824398 | 0.757 | 0.171 | 0.017574   | 14 |
| <b>DDX39A2</b>   | 9.96E-06 | -0.4684196 | 0.892 | 0.171 | 0.01991823 | 14 |
| <b>BLVRB2</b>    | 1.07E-05 | -0.974629  | 0.73  | 0.8   | 0.02134217 | 14 |
| <b>CDC20</b>     | 1.21E-05 | -0.9746252 | 1     | 0.257 | 0.02426179 | 14 |
| <b>CENPN1</b>    | 1.23E-05 | -0.4335591 | 0.838 | 0.129 | 0.02462985 | 14 |
| <b>GSTM3</b>     | 1.27E-05 | -0.2543482 | 0.811 | 0.1   | 0.02546953 | 14 |
| <b>MMD</b>       | 1.27E-05 | -0.3252786 | 0.811 | 0.1   | 0.02546953 | 14 |
| <b>PDZK1IP1</b>  | 1.74E-05 | 0.25421295 | 1     | 0.286 | 0.03482988 | 14 |
| <b>CCNB2</b>     | 1.80E-05 | -0.5667492 | 0.351 | 0.3   | 0.03600908 | 14 |
| <b>GLUL1</b>     | 2.06E-05 | -0.2788304 | 0.324 | 0.357 | 0.04120169 | 14 |

|                    |           |            |       |       |            |    |
|--------------------|-----------|------------|-------|-------|------------|----|
| <b>MZT12</b>       | 2.84E-05  | -0.4341001 | 1     | 0.271 | 0.05681765 | 14 |
| <b>KNL1</b>        | 2.84E-05  | -0.5544755 | 1     | 0.271 | 0.05681765 | 14 |
| <b>MT-ATP62</b>    | 3.11E-05  | -0.7456499 | 1     | 0.271 | 0.06225626 | 14 |
| <b>TMEM14C2</b>    | 3.52E-05  | -0.3518678 | 1     | 0.286 | 0.07046108 | 14 |
| <b>BOLA32</b>      | 3.73E-05  | -0.3719497 | 0.811 | 0.129 | 0.07468696 | 14 |
| <b>CCNA2</b>       | 3.77E-05  | -0.7429713 | 0.027 | 0.214 | 0.0753384  | 14 |
| <b>SEC61G3</b>     | 4.08E-05  | -0.3866594 | 1     | 0.271 | 0.08169659 | 14 |
| <b>SKA2</b>        | 4.08E-05  | -0.5843172 | 1     | 0.271 | 0.08169659 | 14 |
| <b>CENPU3</b>      | 4.08E-05  | -0.7140362 | 1     | 0.271 | 0.08169659 | 14 |
| <b>HSP90B12</b>    | 4.08E-05  | -0.7466039 | 1     | 0.271 | 0.08169659 | 14 |
| <b>SUB13</b>       | 4.08E-05  | -0.8673695 | 1     | 0.271 | 0.08169659 | 14 |
| <b>GTSE1</b>       | 4.17E-05  | -0.5285396 | 0.027 | 0.2   | 0.08342787 | 14 |
| <b>PPIA5</b>       | 4.83E-05  | -0.5465814 | 0.946 | 0.243 | 0.0966603  | 14 |
| <b>SLC1A5</b>      | 5.03E-05  | -0.3366566 | 1     | 0.3   | 0.10066396 | 14 |
| <b>BCL2L11</b>     | 5.66E-05  | -0.3057117 | 0.351 | 0.429 | 0.11318011 | 14 |
| <b>UBE2T</b>       | 6.55E-05  | -0.6800004 | 0.811 | 0.214 | 0.13105506 | 14 |
| <b>MIR4435-2HC</b> | 8.28E-05  | -0.6303697 | 1     | 0.286 | 0.16551052 | 14 |
| <b>HIST1H2AI</b>   | 9.02E-05  | -0.5118353 | 0.568 | 0.129 | 0.18042038 | 14 |
| <b>NUF2</b>        | 0.0001268 | -0.5281519 | 1     | 0.286 | 0.25359171 | 14 |
| <b>CCNB1</b>       | 0.0001268 | -0.9224257 | 1     | 0.286 | 0.25359171 | 14 |
| <b>UBE2C</b>       | 0.0001268 | -1.039939  | 1     | 0.286 | 0.25359171 | 14 |
| <b>HIST1H4C3</b>   | 0.0001268 | -1.7003534 | 1     | 0.286 | 0.25359171 | 14 |

|                  |            |            |       |       |            |    |
|------------------|------------|------------|-------|-------|------------|----|
| <b>EPB42</b>     | 0.00017718 | -0.6062016 | 0.459 | 0.457 | 0.35436969 | 14 |
| <b>KIF2C1</b>    | 0.00019445 | -0.6297123 | 0.811 | 0.229 | 0.38889414 | 14 |
| <b>ELL22</b>     | 0.00024521 | -0.2526853 | 0.784 | 0.114 | 0.49042465 | 14 |
| <b>FBXO5</b>     | 0.0002786  | -0.4509137 | 0.568 | 0.143 | 0.55719537 | 14 |
| <b>PRDX23</b>    | 0.00028643 | -1.0762319 | 1     | 0.843 | 0.57285393 | 14 |
| <b>HBA11</b>     | 0.0002886  | 0.4865947  | 1     | 1     | 0.57720508 | 14 |
| <b>ERH4</b>      | 0.00036389 | -0.5912806 | 1     | 0.3   | 0.72778816 | 14 |
| <b>DLGAP5</b>    | 0.00036389 | -0.8614347 | 1     | 0.3   | 0.72778816 | 14 |
| <b>TUBA1C4</b>   | 0.00036389 | -1.1992258 | 1     | 0.3   | 0.72778816 | 14 |
| <b>TOP2A</b>     | 0.00037268 | -1.0133885 | 0     | 0.286 | 0.74536654 | 14 |
| <b>TUBB2A2</b>   | 0.00049214 | -0.5173571 | 1     | 0.314 | 0.98427899 | 14 |
| <b>HBA22</b>     | 0.0005241  | 0.41037301 | 1     | 1     | 1          | 14 |
| <b>CENPW1</b>    | 0.00053214 | -0.6554443 | 0.811 | 0.243 | 1          | 14 |
| <b>HIST1H1B2</b> | 0.00053214 | -1.1490819 | 0.811 | 0.243 | 1          | 14 |
| <b>NUCB22</b>    | 0.00065811 | -0.4935637 | 0.811 | 0.157 | 1          | 14 |
| <b>SELENBP1</b>  | 0.00095668 | -0.5004049 | 0.514 | 0.543 | 1          | 14 |
| <b>CDCA8</b>     | 0.00096826 | -0.701206  | 1     | 0.314 | 1          | 14 |
| <b>TMPO4</b>     | 0.00096826 | -0.7499629 | 1     | 0.314 | 1          | 14 |
| <b>TYMS1</b>     | 0.00122954 | -0.6940749 | 0     | 0.243 | 1          | 14 |
| <b>MYL4</b>      | 0.00136954 | -0.5090044 | 0.486 | 0.529 | 1          | 14 |
| <b>JPT13</b>     | 0.00143795 | -0.7319006 | 1     | 0.329 | 1          | 14 |

|                  |            |            |       |       |   |    |
|------------------|------------|------------|-------|-------|---|----|
| <b>SPCS21</b>    | 0.00149762 | -0.3390128 | 0.811 | 0.171 | 1 | 14 |
| <b>DHFR1</b>     | 0.00149762 | -0.3896966 | 0.811 | 0.171 | 1 | 14 |
| <b>CDK1</b>      | 0.00180993 | -0.7572006 | 0     | 0.229 | 1 | 14 |
| <b>PIP5K1B</b>   | 0.00253784 | -0.4022232 | 0.784 | 0.257 | 1 | 14 |
| <b>SPTB</b>      | 0.0026505  | -0.8803234 | 0     | 0.214 | 1 | 14 |
| <b>USP1</b>      | 0.00289891 | -0.3065165 | 0.486 | 0.129 | 1 | 14 |
| <b>YWHAH1</b>    | 0.00297825 | -0.8243602 | 0.973 | 0.314 | 1 | 14 |
| <b>RGCC4</b>     | 0.0032361  | -0.3098573 | 1     | 0.357 | 1 | 14 |
| <b>MAD2L1</b>    | 0.00346566 | -0.2501735 | 0     | 0.143 | 1 | 14 |
| <b>NCAPG1</b>    | 0.0038625  | -0.491303  | 0     | 0.2   | 1 | 14 |
| <b>PFN13</b>     | 0.00420977 | -0.7563014 | 0.514 | 0.371 | 1 | 14 |
| <b>NDUFAF32</b>  | 0.0044221  | -0.3598326 | 0.946 | 0.314 | 1 | 14 |
| <b>FAM210B1</b>  | 0.00488577 | -0.5095089 | 0.703 | 0.729 | 1 | 14 |
| <b>SLC4A1</b>    | 0.00507856 | -0.4306237 | 1     | 0.829 | 1 | 14 |
| <b>DEPDC1</b>    | 0.00560308 | -0.6469269 | 0     | 0.186 | 1 | 14 |
| <b>LMNA</b>      | 0.0061585  | -0.3388639 | 0.324 | 0.086 | 1 | 14 |
| <b>HEMGN</b>     | 0.00662176 | -1.0903288 | 0.865 | 0.671 | 1 | 14 |
| <b>HIST1H1E3</b> | 0.00769305 | -1.1545063 | 1     | 0.357 | 1 | 14 |
| <b>CCNF</b>      | 0.00809396 | -0.4901527 | 0     | 0.171 | 1 | 14 |
| <b>KIF20A</b>    | 0.00809396 | -0.5637508 | 0     | 0.171 | 1 | 14 |
| <b>SLIRP2</b>    | 0.00878571 | -0.3792753 | 0.649 | 0.114 | 1 | 14 |
| <b>NUCKS11</b>   | 0.00997337 | -0.6430788 | 1     | 0.357 | 1 | 14 |

|                  |            |            |       |       |   |    |
|------------------|------------|------------|-------|-------|---|----|
| <b>ALAD</b>      | 0.01016902 | -0.4082313 | 1     | 0.371 | 1 | 14 |
| <b>ARHGAP11A</b> | 0.01081222 | -0.3043979 | 0     | 0.129 | 1 | 14 |
| <b>CCDC34</b>    | 0.01164816 | -0.3749101 | 0     | 0.157 | 1 | 14 |
| <b>DIAPH3</b>    | 0.01164816 | -0.3946882 | 0     | 0.157 | 1 | 14 |
| <b>CDCA2</b>     | 0.01164816 | -0.6657215 | 0     | 0.157 | 1 | 14 |
| <b>MOB1B1</b>    | 0.01188701 | -0.7840367 | 1     | 0.357 | 1 | 14 |
| <b>TPX2</b>      | 0.01188701 | -0.7863077 | 1     | 0.357 | 1 | 14 |
| <b>SMC42</b>     | 0.01188701 | -1.092122  | 1     | 0.357 | 1 | 14 |
| <b>MTRNR2L12</b> | 0.01319538 | 0.41049212 | 1     | 0.471 | 1 | 14 |
| <b>HBD1</b>      | 0.01365836 | -0.379178  | 1     | 0.929 | 1 | 14 |
| <b>ASNS</b>      | 0.01474975 | -0.461399  | 0.324 | 0.1   | 1 | 14 |
| <b>TUBG1</b>     | 0.01492361 | -0.5371691 | 1     | 0.371 | 1 | 14 |
| <b>NUSAP11</b>   | 0.0154929  | -0.9774556 | 1     | 0.371 | 1 | 14 |
| <b>OSBP2</b>     | 0.01634604 | -0.6127294 | 1     | 0.386 | 1 | 14 |
| <b>DEPDC1B</b>   | 0.01670835 | -0.2662842 | 0     | 0.143 | 1 | 14 |
| <b>ATP5MC34</b>  | 0.01894884 | -0.475581  | 0.757 | 0.171 | 1 | 14 |
| <b>MINPP1</b>    | 0.01932679 | -0.7715601 | 1     | 0.371 | 1 | 14 |
| <b>RAN3</b>      | 0.01932679 | -0.8644618 | 1     | 0.371 | 1 | 14 |
| <b>ASPM1</b>     | 0.02089675 | -1.2315346 | 0.189 | 0.343 | 1 | 14 |
| <b>CKAP23</b>    | 0.02153751 | -1.2984247 | 1     | 0.371 | 1 | 14 |
| <b>ANP32E1</b>   | 0.02257421 | -0.4767957 | 1     | 0.4   | 1 | 14 |



|                 |            |            |       |       |   |    |
|-----------------|------------|------------|-------|-------|---|----|
| <b>RHD</b>      | 0.02265644 | -0.4659385 | 1     | 0.386 | 1 | 14 |
| <b>CDKN3</b>    | 0.02265644 | -0.4685186 | 1     | 0.386 | 1 | 14 |
| <b>SRP92</b>    | 0.02280251 | -0.6330313 | 0.811 | 0.229 | 1 | 14 |
| <b>CCT23</b>    | 0.02280251 | -0.7597039 | 0.811 | 0.229 | 1 | 14 |
| <b>CISD21</b>   | 0.0234739  | -0.657262  | 1     | 0.386 | 1 | 14 |
| <b>ACTB2</b>    | 0.0238878  | -0.5638268 | 0.973 | 0.8   | 1 | 14 |
| <b>CCDC1671</b> | 0.02389343 | -0.3965784 | 0.432 | 0.157 | 1 | 14 |
| <b>OIP5</b>     | 0.0239031  | -0.2720251 | 0     | 0.129 | 1 | 14 |
| <b>TTK</b>      | 0.0239031  | -0.2852278 | 0     | 0.129 | 1 | 14 |
| <b>ANLN</b>     | 0.0239031  | -0.3507979 | 0     | 0.129 | 1 | 14 |
| <b>NCAPD21</b>  | 0.0239031  | -0.3597381 | 0     | 0.129 | 1 | 14 |
| <b>ESCO21</b>   | 0.0239031  | -0.5192662 | 0     | 0.129 | 1 | 14 |
| <b>BIRC5</b>    | 0.02396521 | -0.6392697 | 1     | 0.371 | 1 | 14 |
| <b>SOX6</b>     | 0.02396521 | -0.7411873 | 1     | 0.371 | 1 | 14 |
| <b>H1FX9</b>    | 0.02396521 | -1.0705514 | 1     | 0.371 | 1 | 14 |
| <b>PNP</b>      | 0.02784394 | -0.2716337 | 1     | 0.4   | 1 | 14 |
| <b>MPP1</b>     | 0.02897277 | 0.27721513 | 1     | 0.529 | 1 | 14 |
| <b>CPOX1</b>    | 0.0331577  | -0.5620208 | 1     | 0.386 | 1 | 14 |
| <b>SKA1</b>     | 0.03413111 | -0.2721191 | 0     | 0.114 | 1 | 14 |
| <b>SGO1</b>     | 0.03680366 | -0.6729877 | 0.568 | 0.229 | 1 | 14 |
| <b>ALAS2</b>    | 0.03803576 | 0.37982031 | 0.892 | 0.829 | 1 | 14 |
| <b>MT-ND4L5</b> | 0.04145649 | -0.7500004 | 0.946 | 0.357 | 1 | 14 |

|                   |            |            |       |       |   |    |
|-------------------|------------|------------|-------|-------|---|----|
| <b>HMGB15</b>     | 0.0570008  | -1.3521647 | 1     | 0.629 | 1 | 14 |
| <b>MT-CO13</b>    | 0.05842766 | -1.0616305 | 1     | 0.671 | 1 | 14 |
| <b>SMIM11</b>     | 0.06270263 | 0.4803907  | 1     | 0.743 | 1 | 14 |
| <b>UROD</b>       | 0.07196828 | -1.3506529 | 1     | 0.614 | 1 | 14 |
| <b>AC092490.1</b> | 0.08852017 | 0.32362122 | 0.432 | 0.057 | 1 | 14 |
| <b>DYNLL11</b>    | 0.09024368 | -0.3564808 | 0.892 | 0.371 | 1 | 14 |
| <b>GLRX5</b>      | 0.09237145 | 0.31315124 | 1     | 0.543 | 1 | 14 |
| <b>SNCA1</b>      | 0.0941578  | -0.3837001 | 0.703 | 0.614 | 1 | 14 |
| <b>EIF2AK11</b>   | 0.09805381 | -0.6525012 | 0.703 | 0.514 | 1 | 14 |
| <b>SSRP11</b>     | 0.1046219  | -0.3255691 | 0.297 | 0.129 | 1 | 14 |
| <b>NFE2</b>       | 0.10557244 | -0.3707219 | 0.973 | 0.457 | 1 | 14 |
| <b>TFRC</b>       | 0.10787207 | -1.4006475 | 1     | 0.614 | 1 | 14 |
| <b>MT-CYB3</b>    | 0.10932107 | -1.0682513 | 1     | 0.414 | 1 | 14 |
| <b>SDHC</b>       | 0.12402988 | -0.2599958 | 0.459 | 0.114 | 1 | 14 |
| <b>GATA1</b>      | 0.13533817 | -0.8672695 | 1     | 0.414 | 1 | 14 |
| <b>MKI67</b>      | 0.13533817 | -1.4549101 | 1     | 0.414 | 1 | 14 |
| <b>STOM1</b>      | 0.14791642 | -0.5033793 | 1     | 0.443 | 1 | 14 |
| <b>PPP1CA1</b>    | 0.15405272 | -0.4918339 | 0.514 | 0.186 | 1 | 14 |
| <b>GYPA</b>       | 0.1888089  | -0.4530284 | 1     | 0.657 | 1 | 14 |
| <b>UBAC1</b>      | 0.20169176 | -0.9050015 | 0.919 | 0.386 | 1 | 14 |
| <b>RHCE</b>       | 0.20716265 | -0.6804226 | 0.595 | 0.286 | 1 | 14 |

|                  |            |            |       |       |   |    |
|------------------|------------|------------|-------|-------|---|----|
| <b>PTTG11</b>    | 0.20892166 | -0.66464   | 1     | 0.457 | 1 | 14 |
| <b>MT-CO33</b>   | 0.21381881 | -1.1137733 | 1     | 0.457 | 1 | 14 |
| <b>NT5C3A2</b>   | 0.22144643 | -0.2784471 | 0.649 | 0.129 | 1 | 14 |
| <b>CENPE1</b>    | 0.24910038 | -1.0497171 | 0.189 | 0.243 | 1 | 14 |
| <b>CTSL</b>      | 0.2635969  | -0.6986547 | 1     | 0.443 | 1 | 14 |
| <b>CYTOR3</b>    | 0.29427533 | -0.6357268 | 1     | 0.457 | 1 | 14 |
| <b>TXN4</b>      | 0.31640246 | -0.9083923 | 1     | 0.457 | 1 | 14 |
| <b>HMGB25</b>    | 0.31939735 | -1.2326902 | 1     | 0.586 | 1 | 14 |
| <b>CAT</b>       | 0.33854587 | -0.7345225 | 1     | 0.571 | 1 | 14 |
| <b>KLF1</b>      | 0.3507258  | -0.6775195 | 1     | 0.471 | 1 | 14 |
| <b>S100A810</b>  | 0.35487144 | -0.4656771 | 0.514 | 0.129 | 1 | 14 |
| <b>HMBS</b>      | 0.35999335 | -0.8852276 | 1     | 0.6   | 1 | 14 |
| <b>CKS22</b>     | 0.36384823 | -1.3523532 | 1     | 0.457 | 1 | 14 |
| <b>MT-CO23</b>   | 0.38685946 | -1.3217763 | 1     | 0.557 | 1 | 14 |
| <b>SLC25A52</b>  | 0.4259687  | -0.5059969 | 0.676 | 0.2   | 1 | 14 |
| <b>CENPF2</b>    | 0.45089626 | -1.2530936 | 1     | 0.457 | 1 | 14 |
| <b>RPLP02</b>    | 0.49303224 | -1.039164  | 1     | 0.571 | 1 | 14 |
| <b>MTHFD21</b>   | 0.52205312 | -0.3695613 | 0.189 | 0.1   | 1 | 14 |
| <b>HSPA82</b>    | 0.53721431 | -0.6707045 | 0.622 | 0.143 | 1 | 14 |
| <b>HMG23</b>     | 0.588911   | -0.5841268 | 1     | 0.557 | 1 | 14 |
| <b>HNRNPA2B1</b> | 0.59086067 | -0.9467135 | 1     | 0.486 | 1 | 14 |
| <b>ORC61</b>     | 0.62347727 | -0.2570803 | 0.189 | 0.129 | 1 | 14 |

|                  |            |            |       |       |          |    |
|------------------|------------|------------|-------|-------|----------|----|
| <b>H2AFZ2</b>    | 0.62510685 | -1.3454218 | 1     | 0.529 | 1        | 14 |
| <b>RAD51C</b>    | 0.67512375 | -0.2567513 | 0.162 | 0.114 | 1        | 14 |
| <b>TUBB3</b>     | 0.67904949 | -1.1493844 | 0.892 | 0.429 | 1        | 14 |
| <b>RFESD</b>     | 0.68177101 | -0.509845  | 1     | 0.5   | 1        | 14 |
| <b>H1F0</b>      | 0.68753541 | -0.7562441 | 0.919 | 0.529 | 1        | 14 |
| <b>PSMA43</b>    | 0.72011893 | -0.2924224 | 0.568 | 0.086 | 1        | 14 |
| <b>CACYBP1</b>   | 0.72011893 | -0.342136  | 0.568 | 0.086 | 1        | 14 |
| <b>SLC2A1</b>    | 0.72707563 | -0.4385101 | 1     | 0.529 | 1        | 14 |
| <b>CCT51</b>     | 0.86708433 | -0.2528658 | 0.135 | 0.086 | 1        | 14 |
| <b>TROAP</b>     | 0.89492321 | -0.797596  | 0.811 | 0.386 | 1        | 14 |
| <b>TUBB4B3</b>   | 0.90725278 | -1.0575696 | 1     | 0.514 | 1        | 14 |
| <b>TUBA1B3</b>   | 0.92309787 | -1.7073071 | 1     | 0.514 | 1        | 14 |
| <b>HIST1H1C2</b> | 0.93394242 | -1.1757887 | 1     | 0.557 | 1        | 14 |
| <b>ILK</b>       | 0.94019494 | -0.281563  | 0.135 | 0.114 | 1        | 14 |
| <b>CD361</b>     | 0.9495712  | -1.0419541 | 1     | 0.514 | 1        | 14 |
| <b>RHAG</b>      | 0.9495712  | -1.2759532 | 1     | 0.514 | 1        | 14 |
| <b>FECH</b>      | 0.9549972  | -0.6929643 | 1     | 0.543 | 1        | 14 |
| <b>EEF1A12</b>   | 0.95505321 | -0.4383434 | 1     | 0.557 | 1        | 14 |
| <b>NDC80</b>     | 0.96258593 | -0.5650065 | 0.568 | 0.2   | 1        | 14 |
| <b>CENPK</b>     | 0.96392013 | -0.4357319 | 0.189 | 0.143 | 1        | 14 |
| <b>TUBA4A3</b>   | 2.04E-13   | 0.45340115 | 1     | 0.037 | 4.07E-10 | 15 |

|                   |          |            |       |       |            |    |
|-------------------|----------|------------|-------|-------|------------|----|
| <b>CYB5D2</b>     | 7.17E-11 | 0.32511598 | 1     | 0.074 | 1.43E-07   | 15 |
| <b>CD14</b>       | 1.30E-10 | 0.32080423 | 0.875 | 0.019 | 2.60E-07   | 15 |
| <b>SERPINA12</b>  | 1.30E-10 | 0.27253435 | 0.875 | 0.019 | 2.60E-07   | 15 |
| <b>HIST2H2BF1</b> | 9.55E-10 | -0.2835226 | 0.938 | 0.074 | 1.91E-06   | 15 |
| <b>NCF13</b>      | 7.00E-09 | 0.38882286 | 0.875 | 0.019 | 1.40E-05   | 15 |
| <b>GP91</b>       | 1.30E-08 | -0.2524205 | 0.125 | 0.019 | 2.61E-05   | 15 |
| <b>CXCL22</b>     | 4.36E-08 | -0.6768673 | 0.125 | 0.167 | 8.72E-05   | 15 |
| <b>APOC1</b>      | 5.40E-08 | -0.3007207 | 0.812 | 0.074 | 0.00010796 | 15 |
| <b>VCAN</b>       | 2.98E-07 | 0.50964884 | 0.188 | 0     | 0.00059594 | 15 |
| <b>ZNF385A</b>    | 5.15E-07 | 0.27443364 | 0.938 | 0.111 | 0.00102995 | 15 |
| <b>C1QTNF4</b>    | 6.43E-07 | -0.2609176 | 0.125 | 0.13  | 0.00128575 | 15 |
| <b>CENPN2</b>     | 7.00E-07 | 0.39167491 | 0.188 | 0.037 | 0.00140038 | 15 |
| <b>EGR11</b>      | 1.67E-06 | -0.5127263 | 1     | 0.167 | 0.00333399 | 15 |
| <b>IL1B2</b>      | 3.01E-06 | 0.29845351 | 1     | 0.185 | 0.00602211 | 15 |
| <b>IFIT31</b>     | 3.82E-06 | 0.3903721  | 0.188 | 0.019 | 0.00764485 | 15 |
| <b>HLA-DMB1</b>   | 4.14E-06 | -0.3780456 | 0.188 | 0.222 | 0.0082772  | 15 |
| <b>G0S21</b>      | 4.43E-06 | 0.27859347 | 0.125 | 0     | 0.00886804 | 15 |
| <b>S100A93</b>    | 5.02E-06 | 1.46958292 | 0.875 | 0.093 | 0.01004876 | 15 |
| <b>HIST1H2AI1</b> | 5.32E-06 | 0.28197803 | 0.188 | 0.056 | 0.01064478 | 15 |
| <b>CA11</b>       | 6.97E-06 | -0.2788015 | 0.188 | 0.111 | 0.01393035 | 15 |
| <b>MAP1A</b>      | 7.69E-06 | 0.33660614 | 0.188 | 0.074 | 0.01537731 | 15 |
| <b>IGHM2</b>      | 1.10E-05 | 0.32939254 | 1     | 0.204 | 0.02204359 | 15 |

|                    |            |            |       |       |            |    |
|--------------------|------------|------------|-------|-------|------------|----|
| <b>AC123912.4</b>  | 2.86E-05   | -0.3994571 | 0.188 | 0.111 | 0.05729527 | 15 |
| <b>FADS21</b>      | 4.01E-05   | 0.28451666 | 0.875 | 0.185 | 0.08029934 | 15 |
| <b>NOLC11</b>      | 4.10E-05   | -0.2575474 | 0.25  | 0.259 | 0.08205748 | 15 |
| <b>HSPA1B1</b>     | 4.72E-05   | -0.318088  | 0.25  | 0.111 | 0.09435416 | 15 |
| <b>PTGS2</b>       | 4.88E-05   | -0.4130744 | 0.875 | 0.167 | 0.09754115 | 15 |
| <b>TEX9</b>        | 4.88E-05   | -0.2609783 | 0.25  | 0.074 | 0.09765942 | 15 |
| <b>S100A811</b>    | 6.11E-05   | -0.2940198 | 0.938 | 0.185 | 0.12212158 | 15 |
| <b>CDKN1A3</b>     | 6.95E-05   | 0.29044426 | 0.25  | 0.037 | 0.13890579 | 15 |
| <b>OTOF</b>        | 0.00010164 | 0.28931885 | 0.188 | 0     | 0.20328928 | 15 |
| <b>CD362</b>       | 0.00015661 | 0.26953304 | 0.25  | 0.111 | 0.31321236 | 15 |
| <b>RBBP8</b>       | 0.00020487 | 0.29231961 | 0.25  | 0.167 | 0.40973358 | 15 |
| <b>CYC12</b>       | 0.00028995 | 0.46081937 | 1     | 0.296 | 0.57989867 | 15 |
| <b>NUDT12</b>      | 0.00034003 | 0.44357489 | 1     | 0.315 | 0.68005317 | 15 |
| <b>PCDH9</b>       | 0.00062224 | 0.29315467 | 1     | 0.278 | 1          | 15 |
| <b>RAB27B</b>      | 0.00081608 | -0.2749765 | 0.312 | 0.185 | 1          | 15 |
| <b>EIF2AK12</b>    | 0.00112376 | 0.33040662 | 1     | 0.333 | 1          | 15 |
| <b>RFX2</b>        | 0.00154298 | -0.3073826 | 0.312 | 0.074 | 1          | 15 |
| <b>MIR4435-2HC</b> | 0.00166897 | 0.30900789 | 1     | 0.37  | 1          | 15 |
| <b>SRP93</b>       | 0.00177023 | 0.42189954 | 1     | 0.389 | 1          | 15 |
| <b>IFI44L6</b>     | 0.00191187 | 0.33597986 | 0.875 | 0.204 | 1          | 15 |
| <b>PPBP5</b>       | 0.00196617 | -1.0289677 | 0.312 | 0.019 | 1          | 15 |

|                    |            |            |       |       |   |    |
|--------------------|------------|------------|-------|-------|---|----|
| <b>HES1</b>        | 0.00202851 | 0.39107421 | 0.312 | 0.037 | 1 | 15 |
| <b>LGALS31</b>     | 0.00202851 | 0.26080213 | 0.312 | 0.037 | 1 | 15 |
| <b>IFI276</b>      | 0.0021332  | 0.7035382  | 0.312 | 0     | 1 | 15 |
| <b>NAAA1</b>       | 0.00215479 | -0.3144594 | 1     | 0.278 | 1 | 15 |
| <b>HERC52</b>      | 0.00215627 | 0.39689659 | 0.312 | 0.037 | 1 | 15 |
| <b>RGS21</b>       | 0.00219265 | 0.69242414 | 0.312 | 0.056 | 1 | 15 |
| <b>MIR22HG2</b>    | 0.00242314 | 0.61166832 | 0.312 | 0.111 | 1 | 15 |
| <b>HIST1H1B3</b>   | 0.00251203 | -0.3967203 | 1     | 0.278 | 1 | 15 |
| <b>LAG31</b>       | 0.00271048 | -0.2634297 | 0.312 | 0.111 | 1 | 15 |
| <b>ATP2B1-AS12</b> | 0.00277946 | 0.7799813  | 0.938 | 0.278 | 1 | 15 |
| <b>AC103591.36</b> | 0.00292062 | 0.5126304  | 0.312 | 0.204 | 1 | 15 |
| <b>MPP11</b>       | 0.00303965 | 0.29417776 | 1     | 0.389 | 1 | 15 |
| <b>PSMB51</b>      | 0.00354354 | 0.25990969 | 0.938 | 0.333 | 1 | 15 |
| <b>ANGPT1</b>      | 0.0037686  | -0.3778393 | 0.812 | 0.204 | 1 | 15 |
| <b>PGAM12</b>      | 0.0045053  | -0.4235261 | 0.375 | 0.315 | 1 | 15 |
| <b>LMAN11</b>      | 0.00525264 | 0.25955196 | 0.938 | 0.333 | 1 | 15 |
| <b>HIST1H2AC4</b>  | 0.005968   | -0.2724689 | 1     | 0.315 | 1 | 15 |
| <b>HIST1H2BF1</b>  | 0.00651577 | -0.4252633 | 0.375 | 0.204 | 1 | 15 |
| <b>SLC1A51</b>     | 0.00762091 | 0.57396632 | 0.312 | 0.185 | 1 | 15 |
| <b>DRAM1</b>       | 0.00835203 | -0.3291673 | 0.375 | 0.185 | 1 | 15 |
| <b>MEG3</b>        | 0.00922637 | 0.3953671  | 0.312 | 0.056 | 1 | 15 |
| <b>FLT3</b>        | 0.00986668 | -0.3166038 | 0.375 | 0.333 | 1 | 15 |

|                   |            |            |       |       |   |    |
|-------------------|------------|------------|-------|-------|---|----|
| <b>PTMS</b>       | 0.01230791 | 0.32469792 | 1     | 0.463 | 1 | 15 |
| <b>FABP52</b>     | 0.01276755 | -0.3564047 | 1     | 0.333 | 1 | 15 |
| <b>SPRY1</b>      | 0.01543006 | -0.4680374 | 0.938 | 0.278 | 1 | 15 |
| <b>AL133415.1</b> | 0.01639913 | -0.5155579 | 1     | 0.333 | 1 | 15 |
| <b>HDLBP2</b>     | 0.01928929 | -0.3257739 | 0.438 | 0.352 | 1 | 15 |
| <b>PGRMC1</b>     | 0.0197534  | -0.3830437 | 0.375 | 0.185 | 1 | 15 |
| <b>CAVIN2</b>     | 0.02088745 | -0.3802367 | 1     | 0.352 | 1 | 15 |
| <b>SYTL4</b>      | 0.02230098 | 0.48008749 | 0.375 | 0.111 | 1 | 15 |
| <b>PSMD83</b>     | 0.02251843 | 0.27405112 | 0.875 | 0.37  | 1 | 15 |
| <b>MMRN1</b>      | 0.0273007  | -0.3146859 | 1     | 0.37  | 1 | 15 |
| <b>NPDC1</b>      | 0.02896641 | 0.35551594 | 1     | 0.463 | 1 | 15 |
| <b>TPST22</b>     | 0.03052346 | -0.3066846 | 0.875 | 0.259 | 1 | 15 |
| <b>WDR744</b>     | 0.03321187 | 0.26185102 | 1     | 0.426 | 1 | 15 |
| <b>CTSC3</b>      | 0.03600456 | -0.3725367 | 0.5   | 0.463 | 1 | 15 |
| <b>FHL1</b>       | 0.03608491 | 0.26970921 | 1     | 0.5   | 1 | 15 |
| <b>UQCC22</b>     | 0.038182   | -0.2570596 | 0.375 | 0.222 | 1 | 15 |
| <b>HIST1H2BC2</b> | 0.04163644 | 0.83579255 | 0.875 | 0.296 | 1 | 15 |
| <b>MT2A8</b>      | 0.04722879 | -0.3903837 | 0.938 | 0.37  | 1 | 15 |
| <b>ACTB3</b>      | 0.04940264 | -0.3365382 | 1     | 0.963 | 1 | 15 |
| <b>TXNDC173</b>   | 0.04958088 | -0.4844268 | 0.938 | 0.333 | 1 | 15 |
| <b>MARCKSL11</b>  | 0.05469975 | -0.2671624 | 0.5   | 0.352 | 1 | 15 |



|                  |            |            |       |       |   |    |
|------------------|------------|------------|-------|-------|---|----|
| <b>NUCB23</b>    | 0.05595017 | 0.27059532 | 0.938 | 0.667 | 1 | 15 |
| <b>DUSP62</b>    | 0.0635843  | -0.8739441 | 1     | 0.389 | 1 | 15 |
| <b>ANXA61</b>    | 0.06810003 | 0.50140004 | 0.75  | 0.222 | 1 | 15 |
| <b>CCT72</b>     | 0.07018128 | -0.3627522 | 0.562 | 0.389 | 1 | 15 |
| <b>PROM1</b>     | 0.07056852 | -0.4281006 | 0.5   | 0.296 | 1 | 15 |
| <b>CITED22</b>   | 0.07458552 | -0.3274868 | 0.5   | 0.333 | 1 | 15 |
| <b>CCT24</b>     | 0.07621889 | -0.299401  | 0.625 | 0.648 | 1 | 15 |
| <b>CFH</b>       | 0.07841144 | -0.2687238 | 0.438 | 0.148 | 1 | 15 |
| <b>TMSB4X1</b>   | 0.07911823 | 0.51131426 | 1     | 0.889 | 1 | 15 |
| <b>CMBL</b>      | 0.08090351 | -0.2728147 | 0.438 | 0.315 | 1 | 15 |
| <b>SRM1</b>      | 0.08924456 | -0.2542939 | 0.438 | 0.222 | 1 | 15 |
| <b>IFI64</b>     | 0.10681803 | 0.28998956 | 0.812 | 0.37  | 1 | 15 |
| <b>VDAC13</b>    | 0.10737213 | -0.2722307 | 0.562 | 0.444 | 1 | 15 |
| <b>LINC02573</b> | 0.11143319 | 0.26193837 | 1     | 0.5   | 1 | 15 |
| <b>TPM42</b>     | 0.11143319 | -0.3309875 | 0.562 | 0.5   | 1 | 15 |
| <b>SAT11</b>     | 0.11300748 | 0.35138015 | 1     | 0.685 | 1 | 15 |
| <b>MT1X2</b>     | 0.12142174 | -0.3254263 | 0.5   | 0.296 | 1 | 15 |
| <b>MEF2C4</b>    | 0.12423277 | -0.2695871 | 1     | 0.444 | 1 | 15 |
| <b>MGLL</b>      | 0.13780046 | -0.2787165 | 0.5   | 0.278 | 1 | 15 |
| <b>TPI13</b>     | 0.14189045 | -0.4655602 | 0.875 | 0.722 | 1 | 15 |
| <b>HSP90AB13</b> | 0.14385092 | -0.3378129 | 1     | 0.963 | 1 | 15 |
| <b>MIF4</b>      | 0.15528543 | -0.3240243 | 0.875 | 0.833 | 1 | 15 |

|                 |            |            |       |       |   |    |
|-----------------|------------|------------|-------|-------|---|----|
| <b>CXCL81</b>   | 0.16197022 | 0.46168351 | 0.438 | 0.13  | 1 | 15 |
| <b>PA2G44</b>   | 0.17123622 | -0.4055864 | 0.75  | 0.611 | 1 | 15 |
| <b>H1FX10</b>   | 0.17259641 | -0.5285575 | 1     | 0.907 | 1 | 15 |
| <b>TAGLN22</b>  | 0.18612584 | 0.30169741 | 1     | 0.889 | 1 | 15 |
| <b>GSTM1</b>    | 0.19254973 | -0.621594  | 0.875 | 0.685 | 1 | 15 |
| <b>S100A104</b> | 0.21353588 | 0.33948648 | 1     | 0.722 | 1 | 15 |
| <b>TSC22D11</b> | 0.21645301 | -0.4960325 | 0.812 | 0.315 | 1 | 15 |
| <b>PHB</b>      | 0.217274   | -0.2823673 | 0.562 | 0.352 | 1 | 15 |
| <b>VIM2</b>     | 0.2262668  | 0.57989527 | 1     | 0.907 | 1 | 15 |
| <b>FTL2</b>     | 0.22630743 | 0.26979808 | 1     | 0.926 | 1 | 15 |
| <b>ID31</b>     | 0.23055029 | 0.30524104 | 0.5   | 0.519 | 1 | 15 |
| <b>HLA-DRA3</b> | 0.24805456 | -0.3185509 | 1     | 0.833 | 1 | 15 |
| <b>MX14</b>     | 0.25144418 | 0.47760792 | 0.625 | 0.111 | 1 | 15 |
| <b>TYROBP2</b>  | 0.25515581 | 0.69695625 | 0.438 | 0.037 | 1 | 15 |
| <b>HLA-DMA1</b> | 0.25813294 | 0.3652017  | 0.688 | 0.5   | 1 | 15 |
| <b>DUSP24</b>   | 0.26743207 | -0.3811049 | 0.5   | 0.204 | 1 | 15 |
| <b>HSPA55</b>   | 0.29620772 | -0.2900742 | 0.938 | 0.778 | 1 | 15 |
| <b>TAF9</b>     | 0.31284944 | -0.5350211 | 0.688 | 0.537 | 1 | 15 |
| <b>LYZ2</b>     | 0.31290671 | 0.41406002 | 0.5   | 0.241 | 1 | 15 |
| <b>HSPD14</b>   | 0.31750569 | -0.4132167 | 0.875 | 0.611 | 1 | 15 |
| <b>LMNA1</b>    | 0.33486315 | 0.53977778 | 0.688 | 0.352 | 1 | 15 |

|                    |            |            |       |       |   |    |
|--------------------|------------|------------|-------|-------|---|----|
| <b>AC020916.14</b> | 0.35039545 | -0.4429139 | 0.875 | 0.407 | 1 | 15 |
| <b>LIPA2</b>       | 0.39704928 | 0.25612057 | 0.5   | 0.185 | 1 | 15 |
| <b>HSPA83</b>      | 0.42689004 | -0.2846473 | 1     | 0.537 | 1 | 15 |
| <b>MAP7</b>        | 0.43813205 | 0.31202248 | 0.5   | 0.278 | 1 | 15 |
| <b>CD34</b>        | 0.44008008 | 0.3260082  | 0.75  | 0.407 | 1 | 15 |
| <b>EREG1</b>       | 0.45043207 | 0.30641027 | 1     | 0.667 | 1 | 15 |
| <b>HNRNPR1</b>     | 0.49805422 | -0.4406074 | 0.75  | 0.444 | 1 | 15 |
| <b>LMAN22</b>      | 0.51277636 | -0.3096104 | 0.812 | 0.333 | 1 | 15 |
| <b>ZFP364</b>      | 0.52348839 | 0.61309229 | 1     | 0.778 | 1 | 15 |
| <b>DUT2</b>        | 0.52807247 | -0.2523169 | 0.75  | 0.611 | 1 | 15 |
| <b>AREG5</b>       | 0.61812586 | -0.2931795 | 1     | 0.741 | 1 | 15 |
| <b>FBL3</b>        | 0.62226237 | -0.3879438 | 0.875 | 0.407 | 1 | 15 |
| <b>ID21</b>        | 0.63094291 | 0.32551747 | 0.688 | 0.389 | 1 | 15 |
| <b>HIST1H4B</b>    | 0.65773403 | -0.2778506 | 0.188 | 0.074 | 1 | 15 |
| <b>SOCS2</b>       | 0.68720799 | -0.2808874 | 0.875 | 0.648 | 1 | 15 |
| <b>TIPARP</b>      | 0.70121224 | 0.75846666 | 0.625 | 0.333 | 1 | 15 |
| <b>RPS27L5</b>     | 0.72650702 | -0.3384807 | 1     | 0.556 | 1 | 15 |
| <b>ATP8B4</b>      | 0.72716507 | -0.300629  | 0.938 | 0.574 | 1 | 15 |
| <b>MGST11</b>      | 0.83028789 | -0.3209752 | 0.812 | 0.389 | 1 | 15 |
| <b>H2AFV4</b>      | 0.8595871  | -0.2692908 | 0.938 | 0.63  | 1 | 15 |
| <b>CD743</b>       | 0.87221144 | 0.29508779 | 1     | 0.944 | 1 | 15 |
| <b>ABRACL3</b>     | 0.87728521 | 0.25818099 | 0.688 | 0.407 | 1 | 15 |

|                  |            |            |       |       |            |    |
|------------------|------------|------------|-------|-------|------------|----|
| <b>RRM11</b>     | 0.88339905 | -0.2705323 | 0.562 | 0.093 | 1          | 15 |
| <b>HIST1H1C3</b> | 0.89353767 | 0.45133661 | 0.812 | 0.685 | 1          | 15 |
| <b>GADD45B4</b>  | 0.94145381 | 0.41673441 | 0.562 | 0.167 | 1          | 15 |
| <b>PHTF11</b>    | 0.9433354  | 0.48282821 | 0.562 | 0.222 | 1          | 15 |
| <b>AVP</b>       | 0.97094136 | 0.78480572 | 0.688 | 0.444 | 1          | 15 |
| <b>DNAJB112</b>  | 0.98090433 | 0.28604595 | 0.562 | 0.204 | 1          | 15 |
| <b>TUBA1B4</b>   | 0.99428889 | -0.3310602 | 0.875 | 0.537 | 1          | 15 |
| <b>CCL4L25</b>   | 4.31E-05   | 0.27809491 | 1     | 0     | 0.08618494 | 16 |
| <b>ID11</b>      | 0.01749416 | -0.7221782 | 0.25  | 0.25  | 1          | 16 |
| <b>CXCL23</b>    | 0.03793243 | 0.30658697 | 0.85  | 0.125 | 1          | 16 |
| <b>RAB32</b>     | 0.03849419 | -0.3006524 | 1     | 0.25  | 1          | 16 |
| <b>RNASE1</b>    | 0.04354407 | -0.4050504 | 1     | 0.25  | 1          | 16 |
| <b>C1QA2</b>     | 0.07790844 | -0.7343515 | 0.95  | 0.25  | 1          | 16 |
| <b>C1orf54</b>   | 0.08600819 | 0.51156511 | 0.8   | 0.125 | 1          | 16 |
| <b>CSTA1</b>     | 0.12088485 | -0.3587833 | 1     | 1     | 1          | 16 |
| <b>CKS23</b>     | 0.14412627 | 0.3080757  | 0.75  | 0.125 | 1          | 16 |
| <b>S100A122</b>  | 0.16190375 | -0.7581612 | 0.95  | 0.75  | 1          | 16 |
| <b>BZW22</b>     | 0.19408996 | -0.3276166 | 0.55  | 0.5   | 1          | 16 |
| <b>NAPSA</b>     | 0.19445686 | 0.35447386 | 0.95  | 0.625 | 1          | 16 |
| <b>RG22</b>      | 0.2127858  | -0.2784071 | 0.75  | 0.875 | 1          | 16 |
| <b>IFI277</b>    | 0.22663786 | 1.01166818 | 0.35  | 0     | 1          | 16 |

|                  |            |            |      |       |   |    |
|------------------|------------|------------|------|-------|---|----|
| <b>TNFRSF21</b>  | 0.22663786 | 0.26556966 | 0.35 | 0     | 1 | 16 |
| <b>NR4A23</b>    | 0.23205307 | -0.2976619 | 0.8  | 0.875 | 1 | 16 |
| <b>DUT3</b>      | 0.23205307 | -0.4796305 | 0.9  | 0.875 | 1 | 16 |
| <b>H1FX11</b>    | 0.23205307 | -0.5074311 | 1    | 0.875 | 1 | 16 |
| <b>THBS12</b>    | 0.25024608 | -0.8153411 | 0.85 | 0.25  | 1 | 16 |
| <b>GSTM31</b>    | 0.25122604 | -0.3199072 | 1    | 0.375 | 1 | 16 |
| <b>GLUL2</b>     | 0.25187746 | -0.3315137 | 0.55 | 0.5   | 1 | 16 |
| <b>SNRPD31</b>   | 0.25226758 | -0.4438311 | 0.8  | 0.625 | 1 | 16 |
| <b>SEC61G4</b>   | 0.25246244 | -0.3520176 | 0.9  | 0.75  | 1 | 16 |
| <b>RNASE61</b>   | 0.25252737 | -0.3031768 | 1    | 0.875 | 1 | 16 |
| <b>EMP1</b>      | 0.27291163 | -0.2764115 | 1    | 0.375 | 1 | 16 |
| <b>C1QB2</b>     | 0.27291163 | -0.7596166 | 1    | 0.375 | 1 | 16 |
| <b>MT1E2</b>     | 0.29584391 | -0.2964601 | 1    | 0.375 | 1 | 16 |
| <b>CD83</b>      | 0.34653655 | 0.6997948  | 0.95 | 0.625 | 1 | 16 |
| <b>LYZ3</b>      | 0.34680064 | -0.2586785 | 1    | 1     | 1 | 16 |
| <b>HSPA56</b>    | 0.37348825 | 0.55664891 | 1    | 0.875 | 1 | 16 |
| <b>VCAN1</b>     | 0.37348825 | -0.5642944 | 1    | 0.875 | 1 | 16 |
| <b>S100A94</b>   | 0.37348825 | -0.7137846 | 0.95 | 0.875 | 1 | 16 |
| <b>TMEM2082</b>  | 0.42517904 | 0.27645455 | 0.4  | 0     | 1 | 16 |
| <b>CD1E</b>      | 0.43048809 | -0.3534831 | 1    | 0.75  | 1 | 16 |
| <b>MTRNR2L12</b> | 0.43048809 | -0.4102794 | 1    | 0.75  | 1 | 16 |
| <b>NDUFAF33</b>  | 0.45872302 | 0.29741567 | 0.7  | 0.25  | 1 | 16 |

|                 |            |            |      |       |   |    |
|-----------------|------------|------------|------|-------|---|----|
| <b>CD141</b>    | 0.45965174 | -0.5013689 | 0.95 | 0.375 | 1 | 16 |
| <b>S100A812</b> | 0.46088275 | -1.2579575 | 1    | 0.875 | 1 | 16 |
| <b>2-Jun</b>    | 0.49237309 | -0.2738521 | 0.8  | 1     | 1 | 16 |
| <b>RHOB4</b>    | 0.52384388 | -0.2544874 | 0.9  | 0.375 | 1 | 16 |
| <b>LILRA5</b>   | 0.52441398 | -0.3338201 | 1    | 0.5   | 1 | 16 |
| <b>STXBP2</b>   | 0.55812306 | -0.2693371 | 1    | 0.5   | 1 | 16 |
| <b>CLEC10A</b>  | 0.55812306 | -0.3430085 | 0.75 | 0.5   | 1 | 16 |
| <b>CUX11</b>    | 0.59234399 | -0.2623319 | 0.65 | 0.375 | 1 | 16 |
| <b>PDE4B1</b>   | 0.59285235 | -0.250593  | 1    | 0.5   | 1 | 16 |
| <b>ALOX5AP2</b> | 0.59315646 | -0.4515364 | 0.9  | 0.625 | 1 | 16 |
| <b>LYN3</b>     | 0.59335882 | -0.2506994 | 1    | 0.875 | 1 | 16 |
| <b>HBEGF</b>    | 0.6653764  | -0.323356  | 1    | 0.625 | 1 | 16 |
| <b>SPI12</b>    | 0.66554847 | -0.2518831 | 1    | 1     | 1 | 16 |
| <b>RAB131</b>   | 0.70153394 | -0.2684394 | 0.7  | 0.25  | 1 | 16 |
| <b>VDAC31</b>   | 0.70251054 | -0.255832  | 1    | 0.5   | 1 | 16 |
| <b>TMED92</b>   | 0.70251054 | -0.2803219 | 0.8  | 0.5   | 1 | 16 |
| <b>MPEG1</b>    | 0.7027435  | -0.2625419 | 1    | 0.625 | 1 | 16 |
| <b>CD693</b>    | 0.7027435  | -0.2772111 | 1    | 0.625 | 1 | 16 |
| <b>PLEK3</b>    | 0.70289851 | 0.26545775 | 0.95 | 0.875 | 1 | 16 |
| <b>PHACTR1</b>  | 0.70289851 | -0.3131011 | 0.85 | 0.875 | 1 | 16 |
| <b>EREG2</b>    | 0.74084313 | -0.7154835 | 1    | 0.625 | 1 | 16 |

|                    |            |            |      |       |   |    |
|--------------------|------------|------------|------|-------|---|----|
| <b>HIST1H1E4</b>   | 0.74094574 | -0.2862263 | 0.9  | 0.75  | 1 | 16 |
| <b>CD68</b>        | 0.77941251 | -0.2509002 | 0.85 | 0.5   | 1 | 16 |
| <b>F13A12</b>      | 0.77941251 | -0.3693585 | 1    | 0.5   | 1 | 16 |
| <b>HIST1H1D8</b>   | 0.81896393 | -0.455964  | 0.9  | 0.75  | 1 | 16 |
| <b>AL133415.11</b> | 0.85764603 | 0.34676694 | 0.5  | 0.125 | 1 | 16 |
| <b>ICAM1</b>       | 0.85764603 | 0.33552373 | 0.55 | 0.125 | 1 | 16 |
| <b>MRPL131</b>     | 0.85805525 | -0.3446591 | 0.7  | 0.25  | 1 | 16 |
| <b>CTSB1</b>       | 0.85853785 | -0.2519294 | 0.7  | 0.5   | 1 | 16 |
| <b>CISD22</b>      | 0.85865295 | -0.250185  | 1    | 0.625 | 1 | 16 |
| <b>SRM2</b>        | 0.89805205 | 0.31684602 | 0.5  | 0.125 | 1 | 16 |
| <b>MT2A9</b>       | 0.89877692 | 0.32953822 | 1    | 0.625 | 1 | 16 |
| <b>STOML21</b>     | 0.89877692 | -0.2781341 | 1    | 0.625 | 1 | 16 |
| <b>CYBB</b>        | 0.89877692 | -0.3196092 | 1    | 0.625 | 1 | 16 |
| <b>ANKRD282</b>    | 0.89877692 | -0.4383737 | 0.95 | 0.625 | 1 | 16 |
| <b>SOX43</b>       | 0.93902786 | 0.61223372 | 0.65 | 0.375 | 1 | 16 |
| <b>TNF2</b>        | 1          | 0.7194576  | 0.5  | 0     | 1 | 16 |
| <b>EIF4A33</b>     | 1          | 0.36901005 | 0.5  | 0     | 1 | 16 |

ers
